# Supplementary material for: Combinatorial synthesis of functionalized chiral and doubly chiral ionic liquids and their applications as asymmetric covalent/non-covalent bifunctional organocatalysts
Source: Royal Society of Chemistry journal article supplement (doi:10.1039/b713843a), 2008-01-01

## Supporting Information for

### Combinatorial Synthesis of Functionalized Chiral and Double Chiral Ionic Liquids and Their Applications as Asymmetric Non-Covalent Bifunctional Organocatalysts

Long Zhang,<sup>a</sup> Sanzhong Luo,<sup>\*,b</sup> Xueling Mi,<sup>b</sup> Song Liu,<sup>b</sup> Yupu Qiao,<sup>b</sup> Hui Xu<sup>b</sup> and Jin-Pei Cheng<sup>\*,a</sup>

<sup>a</sup> Department of Chemistry, State Key Laboratory of elemento-organic Chemistry, Nankai University, Tianjin, 300071, China and <sup>b</sup> Beijing National Laboratory for Molecular Sciences (BNLMS), Center for Molecular Science, Institute of Chemistry, Chinese Academy of Sciences, Beijing, 100080, China.

[luosz@iccas.ac.cn](mailto:luosz@iccas.ac.cn), [chengjp@mail.most.gov.cn](mailto:chengjp@mail.most.gov.cn)

**Synthesis of chiral cyclic sulfate and cyclic sulfamidates followed previous publications with minor modifications (*Tetrahedron*, 2003, 59, 2581-2616; *J. Org. Chem.* 2002, 67, 5164-5169):**

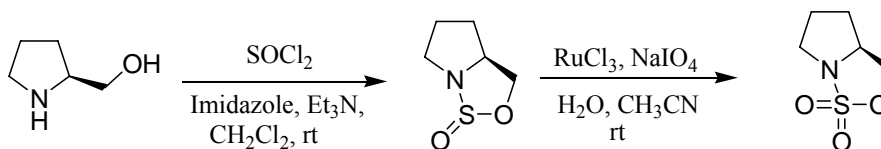

To a solution of imidazole (10.88 g, 0.16 mol) in 400 ml CH<sub>2</sub>Cl<sub>2</sub> was added triethylamine (12.24 mL, 0.088 mol) and prolinol (4.046 g, 0.04 mol) with stirring, the reaction was cooled to 0°C, followed by the dropwise addition of thionyl chloride (3.28 mL, 0.042 mol), the mixture was allowed to warm to rt and stirred overnight, then 200 ml

# Supplementary Material (ESI) for Organic and Biomolecular Chemistry  
# This journal is © The Royal Society of Chemistry 2007

water was added, the organic phase was separated and the aqueous phase was washed with  $\text{CH}_2\text{Cl}_2$  (40 mL  $\times$  2) twice, the combined organic phase was washed with water (40 mL), dried with  $\text{Na}_2\text{SO}_4$  and concentrated in *vacuo* after filtration to give a yellow oil, which was used without any purification in the next step.

The yellow oil was dissolved in  $\text{CH}_3\text{CN}$  (250 mL) under ice-water bath,  $\text{RuCl}_3$  (80 mg, 0.38 mmol) and  $\text{NaIO}_4$  (12.8 g, 0.06 mol) was added in portion, followed by the addition of 200 ml water, the solution was stirred overnight under rt, quenched with 200 ml  $\text{Et}_2\text{O}$ , the organic phase was collected, the aqueous phase was filtered and then transferred to a separatory funnel, washed with  $\text{Et}_2\text{O}$  (40 mL  $\times$  2), the combined organic phase was washed with 50 ml saturated aqueous  $\text{NaHCO}_3$ , 50 ml brine, dried with  $\text{Na}_2\text{SO}_4$ , filtered, concentrated in *vacuo*, the residue was purified by flash chromatography on silica gel to afford the sulfamidate as a white solid (5.62 g, total yield of 86%).  $[\alpha]_{\text{D}}^{20\text{C}} = +40.1^\circ$  (C=1.0,  $\text{CHCl}_3$ );  $^1\text{H}$  NMR (300 MHz,  $\text{CDCl}_3$ ):  $\delta$  1.74-1.83 (1H, m), 1.86-1.95 (2H, m), 2.08-2.20 (1H, m), 3.17-3.26 (1H, m), 3.57-3.65 (1H, m), 3.98-4.04 (1H, m), 4.19-4.27 (1H, m), 4.48-4.54 (1H, m);  $^{13}\text{C}$  NMR ( $\text{CDCl}_3$ , 75 MHz):  $\delta$  25.13, 31.30, 51.06, 62.44, 71.73; HRMS (EI) for  $\text{C}_5\text{H}_9\text{NO}_3\text{S}$  (M): calcd. 163.0303, found 163.0305.

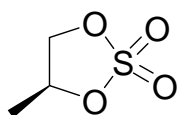

$[\alpha]_{\text{D}}^{20\text{C}} = +0.6^\circ$  (C=1.0,  $\text{CHCl}_3$ );  $^1\text{H}$  NMR (300 MHz,  $\text{CDCl}_3$ ):  $\delta$  1.55 (3H, d,  $J=6.22\text{Hz}$ ), 4.29 (1H, t,  $J=8.67\text{Hz}$ ), 4.72 (1H, dd,  $J=5.65\text{ Hz}$ , 5.65Hz, 8.67 Hz), 5.07-5.14 (1H, m);  $^{13}\text{C}$  NMR ( $\text{CDCl}_3$ , 75 MHz):  $\delta$  17.60, 74.33, 80.15. HRMS (EI) for  $\text{C}_3\text{H}_5\text{O}_4\text{S}$  (M-1): calcd. 136.9909, found 136.9907.

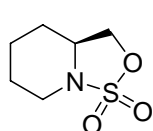  $[\alpha]_D^{20} = +48.4^\circ$  (C=1.0, CHCl<sub>3</sub>); <sup>1</sup>H NMR (300 MHz, CDCl<sub>3</sub>): δ 1.26-1.45 (2H, m), 1.51-1.64 (1H, m), 1.74-1.88 (3H, m), 2.70 (1H, td, *J* = 11.87 Hz, 2.83 Hz), 3.35-3.49 (2H, m), 4.13 (1H, dd, *J* = 7.91 Hz, 8.1 Hz, 9.79 Hz), 4.54 (1H, dd, *J* = 5.27 Hz, 5.84 Hz, 7.91 Hz); <sup>13</sup>C NMR (CDCl<sub>3</sub>, 75 MHz): δ 21.79, 23.32, 27.63, 43.58, 57.16, 73.75; HRMS (EI) for C<sub>6</sub>H<sub>11</sub>NO<sub>3</sub>S (M): calcd. 177.0460, found 177.0459.

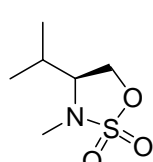  $[\alpha]_D^{20} = +33.6^\circ$  (C=1.0, CHCl<sub>3</sub>); <sup>1</sup>H NMR (300 MHz, CDCl<sub>3</sub>): δ 0.96 (6H, dd, *J* = 4.90 Hz, 4.90 Hz, 6.97 Hz), 1.96-2.08 (1H, m), 2.77 (3H, s), 3.30-3.36 (1H, m), 4.23 (1H, dd, *J* = 7.35 Hz, 7.91 Hz, 8.67 Hz), 4.44 (1H, dd, *J* = 7.35 Hz, 7.35 Hz, 8.48 Hz); <sup>13</sup>C NMR (CDCl<sub>3</sub>, 75 MHz): δ 21.79, 23.32, 27.63, 43.58, 57.16, 73.75; HRMS (EI) for C<sub>6</sub>H<sub>13</sub>NO<sub>3</sub>S (M): calcd. 179.0616, found 179.0615.

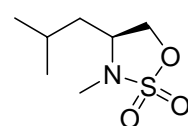  $[\alpha]_D^{20} = +67.7^\circ$  (C=1.0, CHCl<sub>3</sub>); <sup>1</sup>H NMR (300 MHz, CDCl<sub>3</sub>): δ 0.92 (6H, t, *J* = 6.4 Hz), 1.38-1.46 (1H, m), 1.54-1.67 (2H, m), 2.72 (3H, s), 3.46-3.55 (1H, m), 4.10 (1H, t, *J* = 8.28 Hz), 4.55 (1H, dd, *J* = 6.60 Hz, 6.78 Hz, 8.29 Hz); <sup>13</sup>C NMR (CDCl<sub>3</sub>, 75 MHz): δ 22.04, 23.33, 24.38, 32.22, 40.36, 59.21, 71.92; HRMS (EI) for C<sub>7</sub>H<sub>15</sub>NO<sub>3</sub>S (M): calcd. 193.0773, found 193.0772.

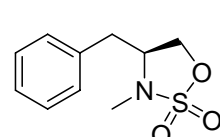  $[\alpha]_D^{20} = +25.1^\circ$  (C=1.0, CHCl<sub>3</sub>); <sup>1</sup>H NMR (300 MHz, CDCl<sub>3</sub>): δ 2.72-2.84 (4H, m), 3.16 (1H, dd, *J* = 5.66 Hz, 5.84 Hz, 13.57 Hz), 3.65-3.76 (1H, m), 4.19 (1H, dd, *J* = 7.5 Hz, 7.72 Hz, 8.67 Hz), 4.35 (1H, dd, *J* = 6.6 Hz, 6.6 Hz, 8.66 Hz), 7.15-7.21 (2H, m), 7.27-7.37 (3H, m); <sup>13</sup>C NMR (CDCl<sub>3</sub>, 75 MHz): δ

# Supplementary Material (ESI) for Organic and Biomolecular Chemistry  
# This journal is © The Royal Society of Chemistry 2007

32.69, 37.93, 61.72, 71.81, 127.53, 129.04, 129.07, 134.65; HRMS (EI) for C<sub>10</sub>H<sub>13</sub>NO<sub>3</sub>S  
(M): calcd. 227.0616, found 227.0613.

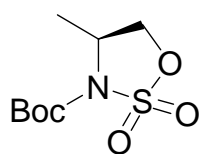

$[\alpha]_D^{20} = +3.7^\circ$  (C=1.0, CHCl<sub>3</sub>); <sup>1</sup>H NMR (300 MHz, CDCl<sub>3</sub>):  $\delta$

1.50 (3H, d,  $J = 6.41$  Hz), 1.55 (9H, s), 4.19 (1H, dd,  $J = 3.02$  Hz, 9.04 Hz), 4.36-4.48 (1H, m), 4.66 (1H, dd,  $J = 6.02$  Hz, 9.05 Hz); <sup>13</sup>C

NMR (CDCl<sub>3</sub>, 75 MHz):  $\delta$  18.31, 27.94, 53.80, 71.31, 85.36, 148.47; HRMS (EI) for C<sub>8</sub>H<sub>15</sub>NO<sub>5</sub>S (M): calcd. 237.0671, found 237.0673.

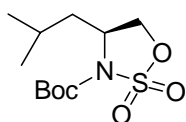

$[\alpha]_D^{20} = +14.5^\circ$  (C=1.0, CHCl<sub>3</sub>); <sup>1</sup>H NMR (300 MHz, CDCl<sub>3</sub>):  $\delta$  0.96

(6H, dd,  $J = 6.59$  Hz, 6.59 Hz, 9.23 Hz), 1.54 (9H, s), 1.57-1.84 (3H, m),

4.27-4.36 (2H, m), 4.63 (1H, dd,  $J = 6.03$  Hz, 9.23 Hz); <sup>13</sup>C NMR (CDCl<sub>3</sub>, 75 MHz):  $\delta$  21.66, 23.23, 24.68, 27.92, 40.96, 56.30, 70.03, 85.32, 148.61; HRMS (EI) for C<sub>11</sub>H<sub>21</sub>NO<sub>5</sub>S (M): calcd. 279.1140, found 279.1143.

NMR Spectra:

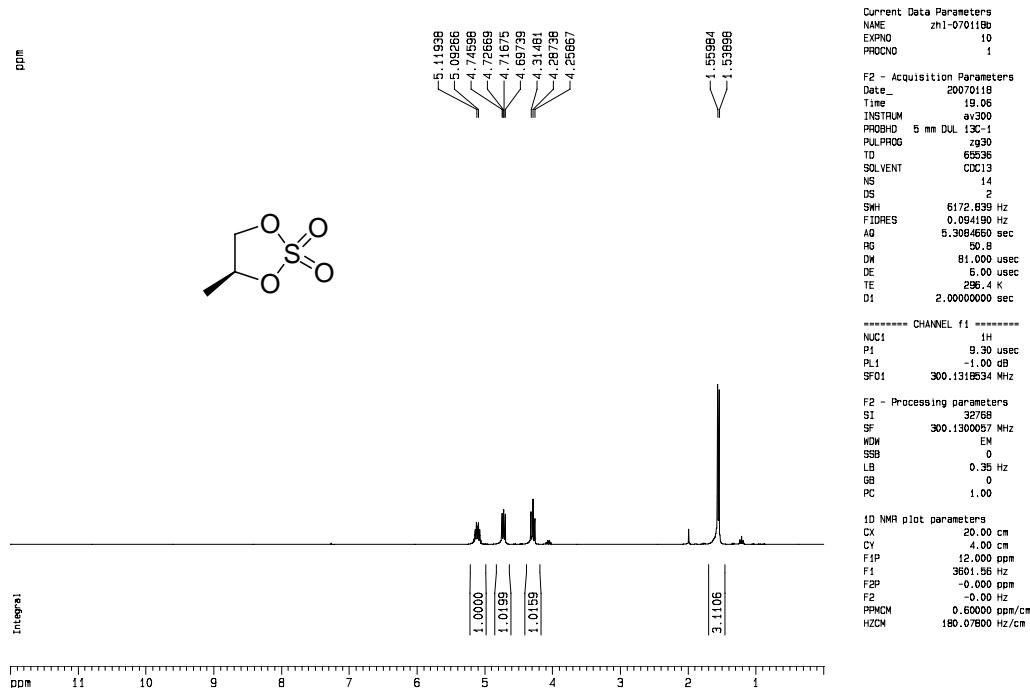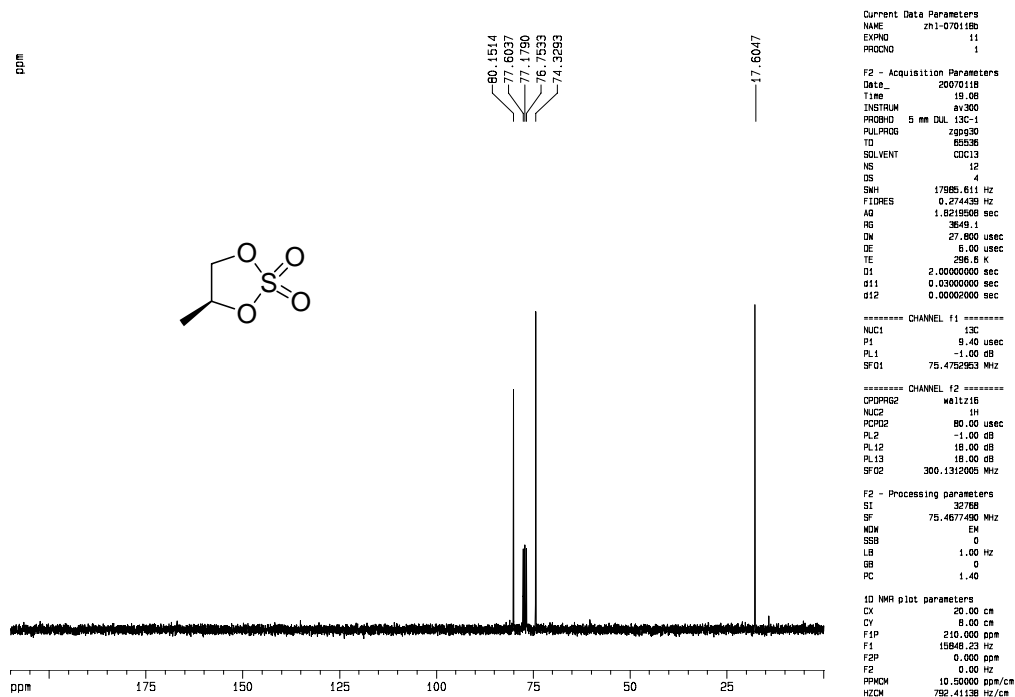

# Supplementary Material (ESI) for Organic and Biomolecular Chemistry  
 # This journal is © The Royal Society of Chemistry 2007

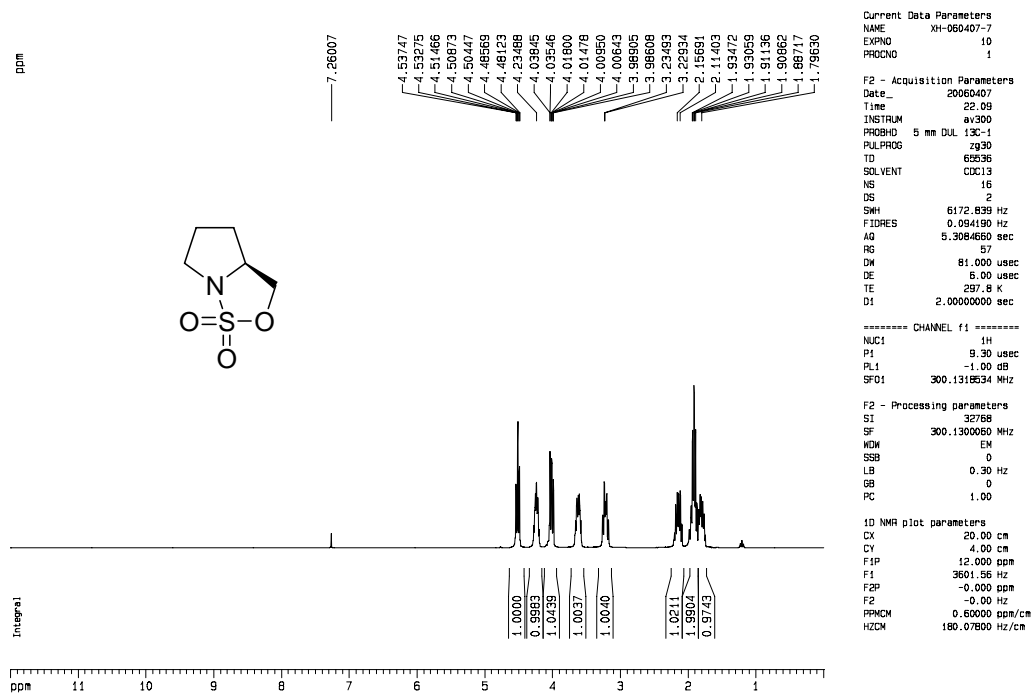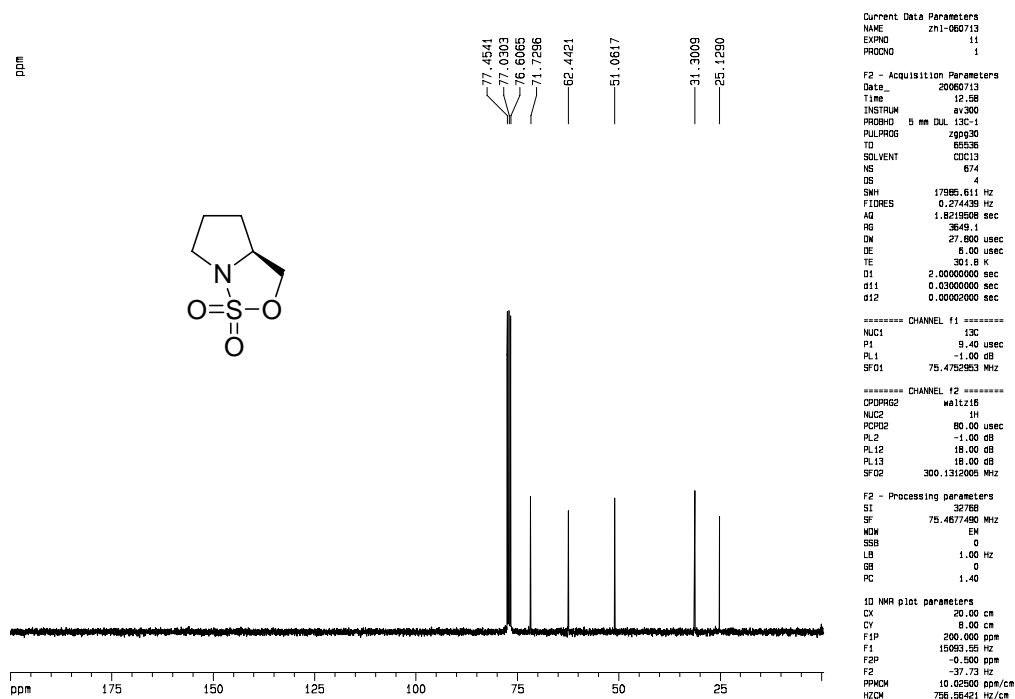

# Supplementary Material (ESI) for Organic and Biomolecular Chemistry  
 # This journal is © The Royal Society of Chemistry 2007

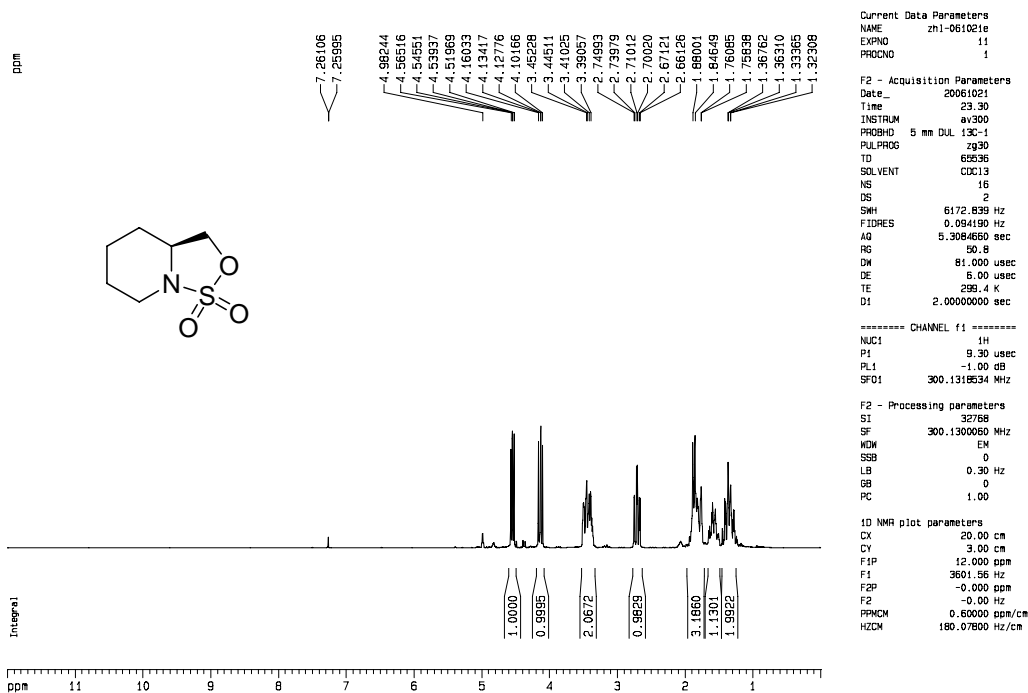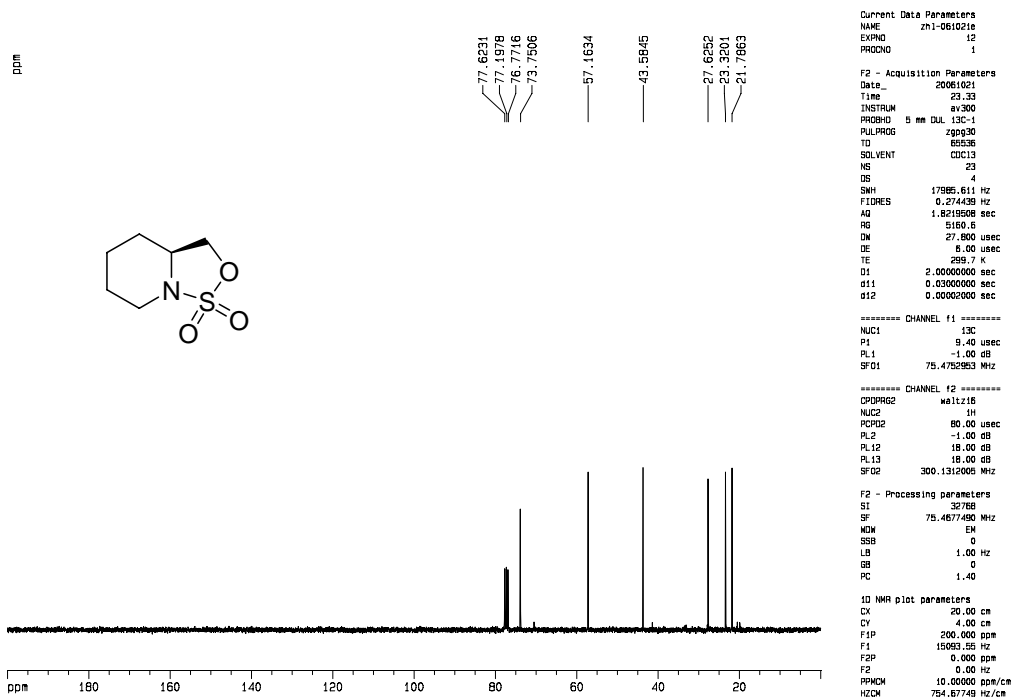

# Supplementary Material (ESI) for Organic and Biomolecular Chemistry  
 # This journal is © The Royal Society of Chemistry 2007

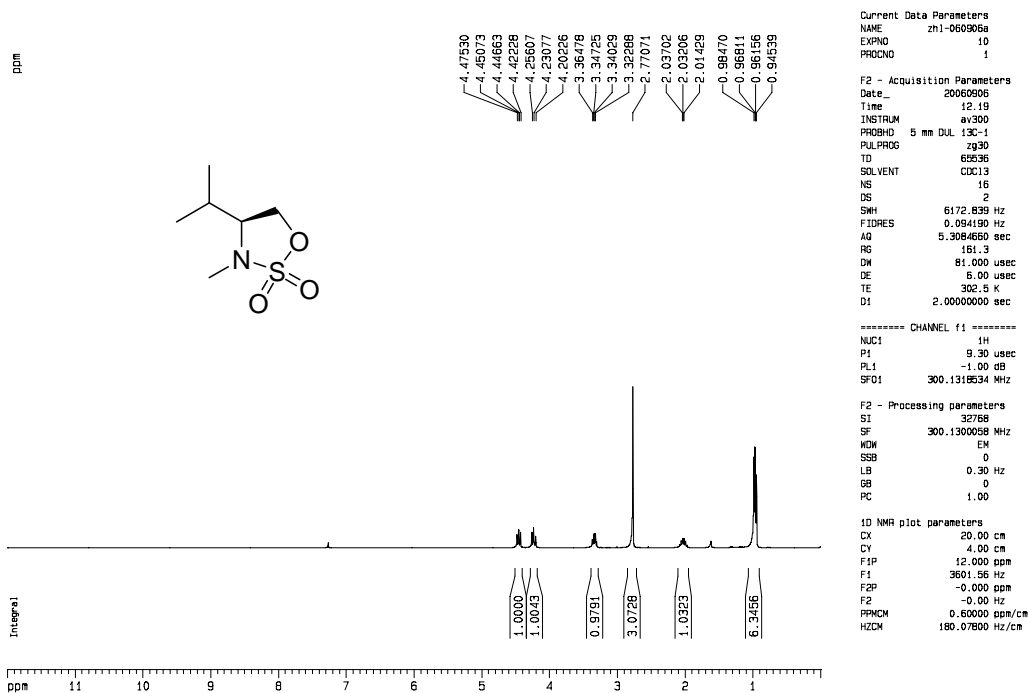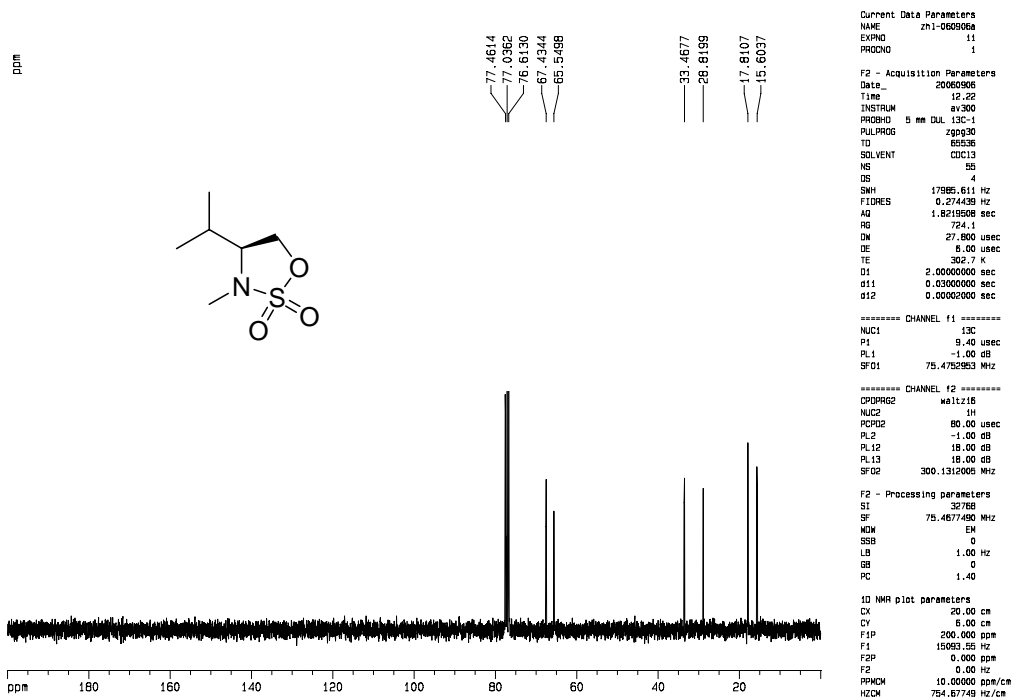



# Supplementary Material (ESI) for Organic and Biomolecular Chemistry  
 # This journal is © The Royal Society of Chemistry 2007

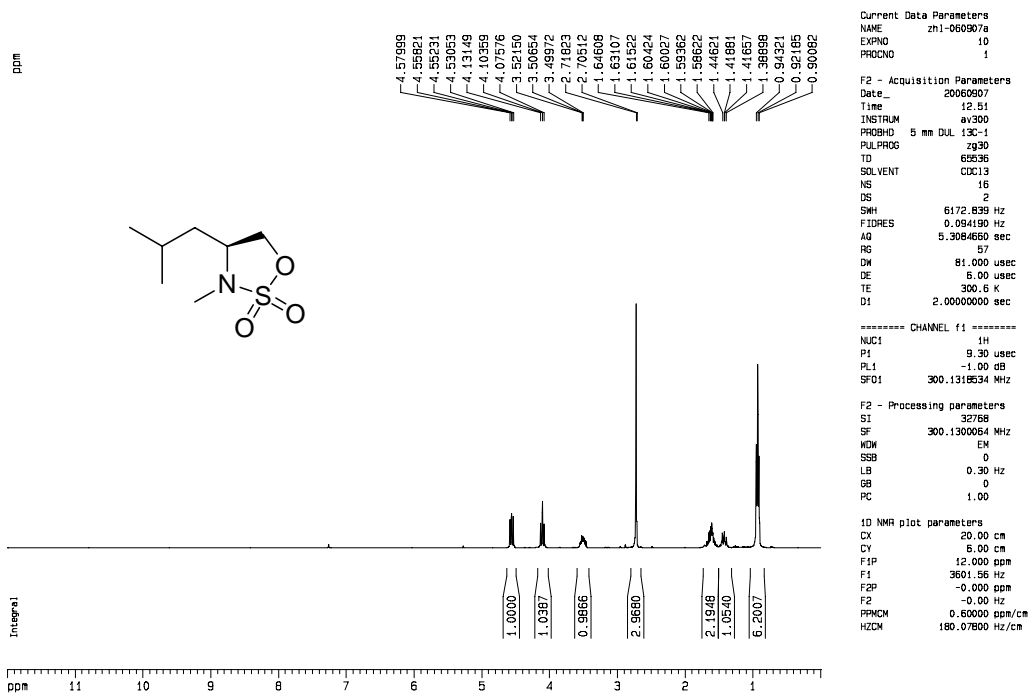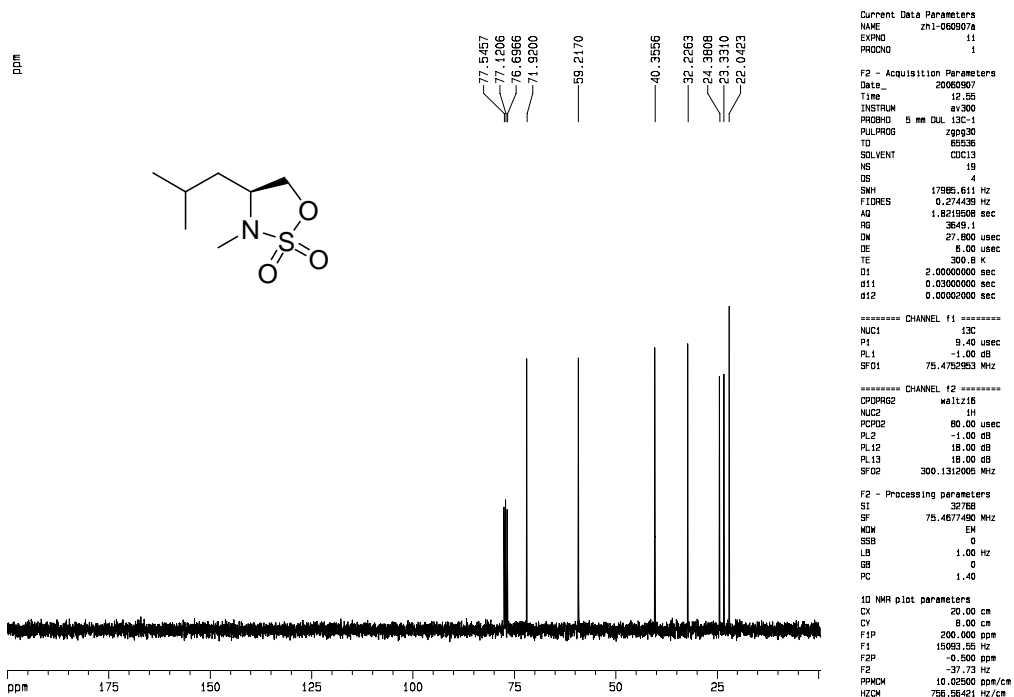

# Supplementary Material (ESI) for Organic and Biomolecular Chemistry  
 # This journal is © The Royal Society of Chemistry 2007

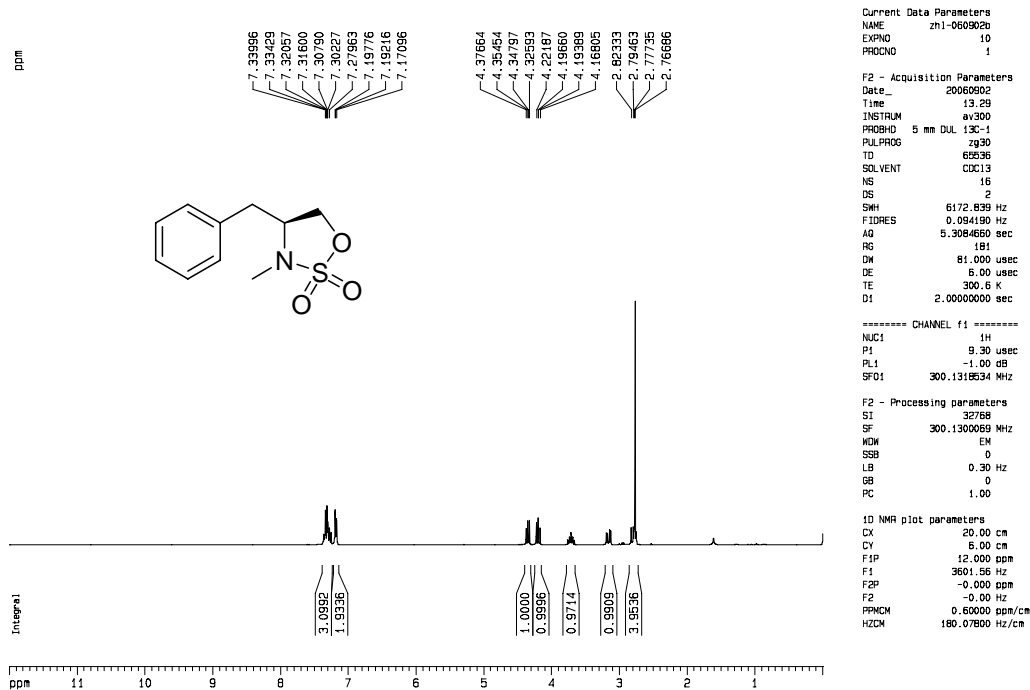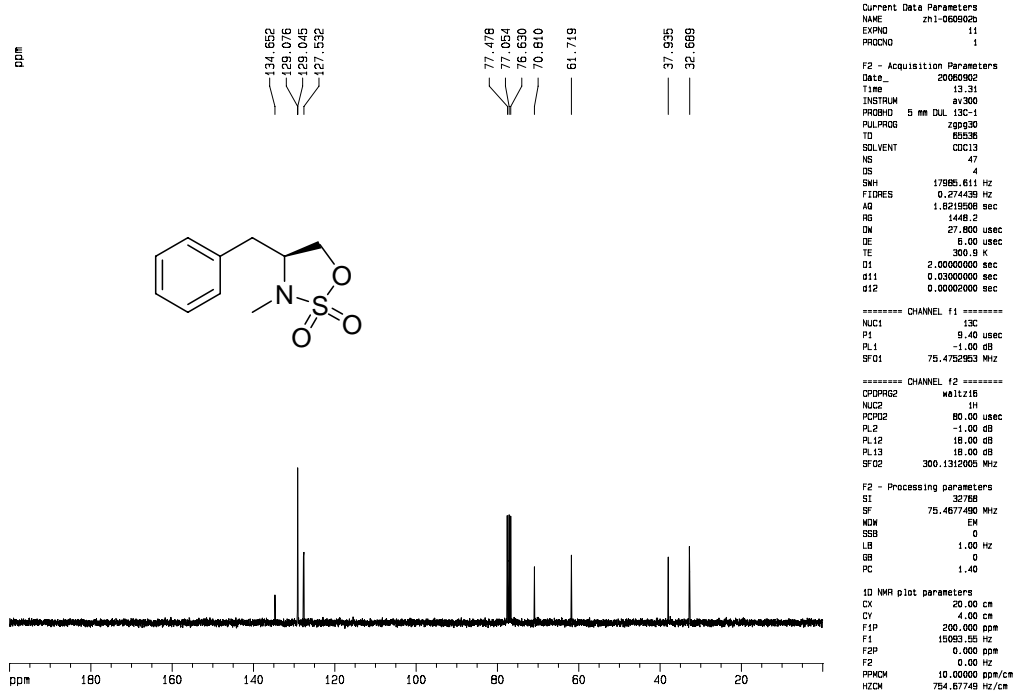

# Supplementary Material (ESI) for Organic and Biomolecular Chemistry  
 # This journal is © The Royal Society of Chemistry 2007

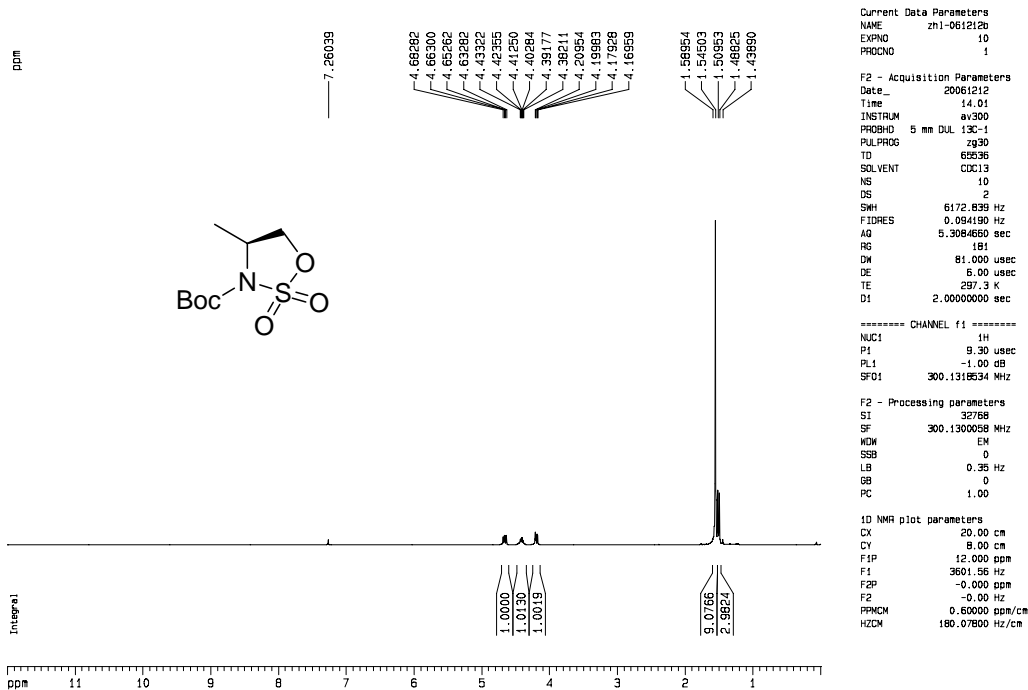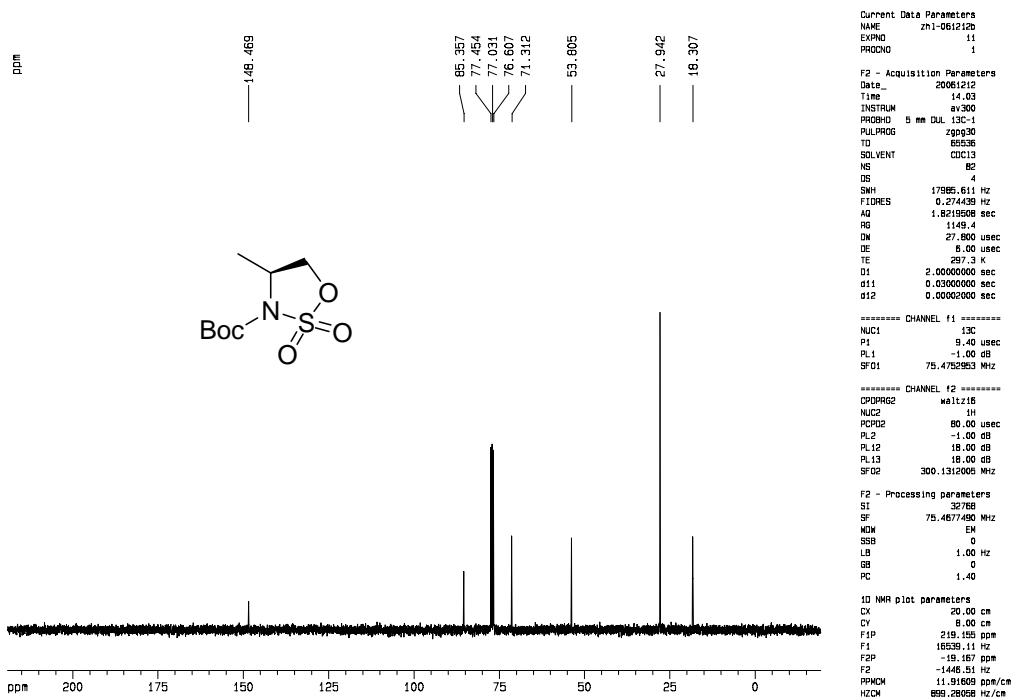

# Supplementary Material (ESI) for Organic and Biomolecular Chemistry  
 # This journal is © The Royal Society of Chemistry 2007

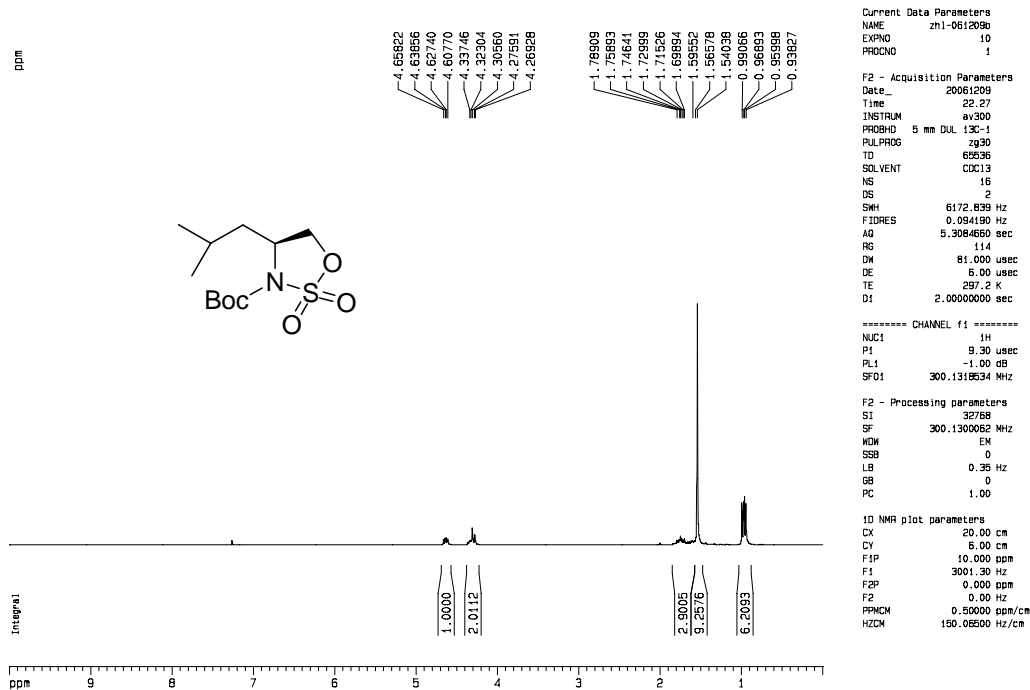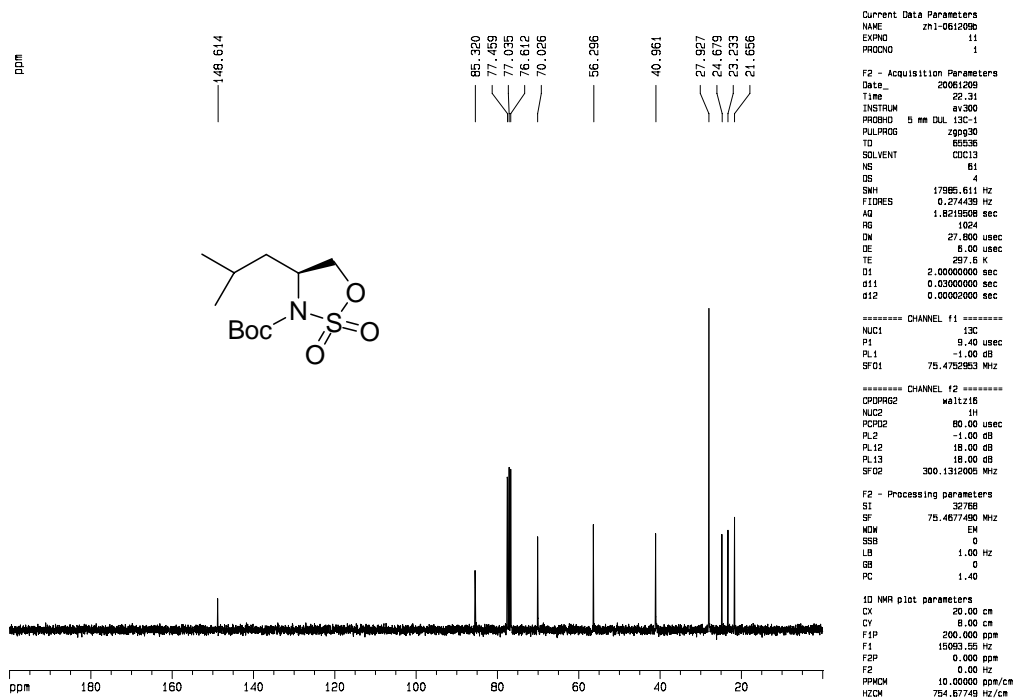

# Supplementary Material (ESI) for Organic and Biomolecular Chemistry  
 # This journal is © The Royal Society of Chemistry 2007

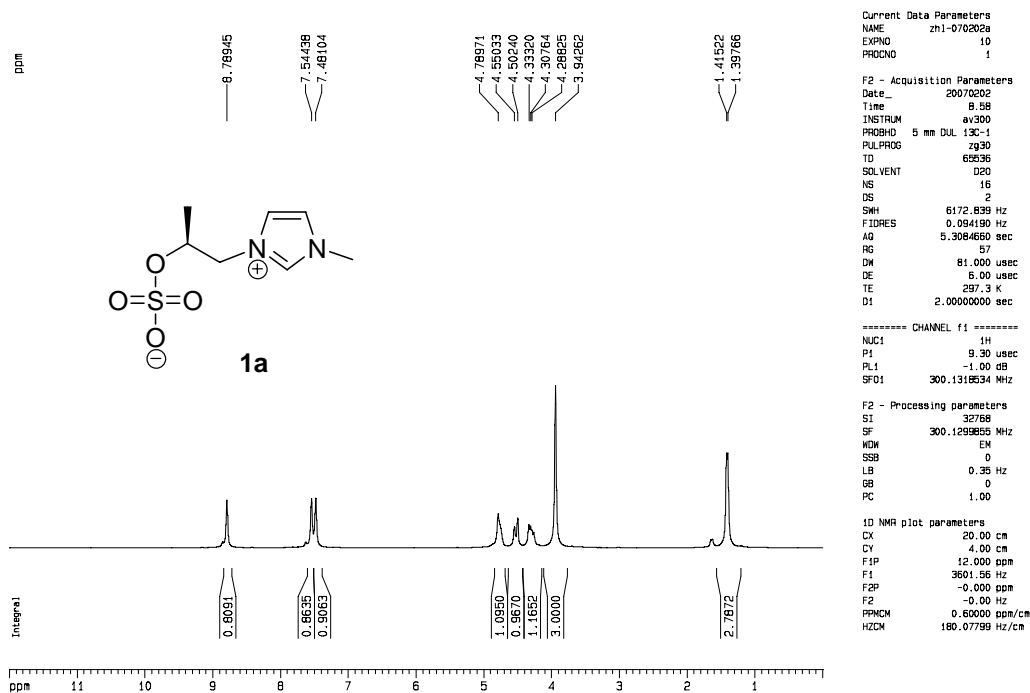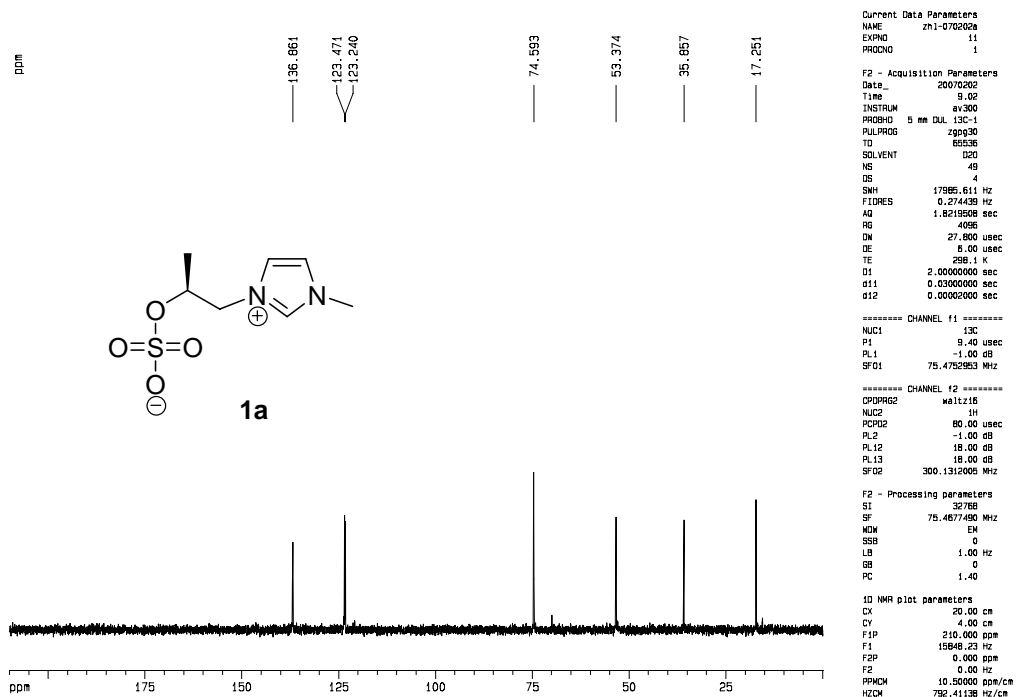

# Supplementary Material (ESI) for Organic and Biomolecular Chemistry  
 # This journal is © The Royal Society of Chemistry 2007

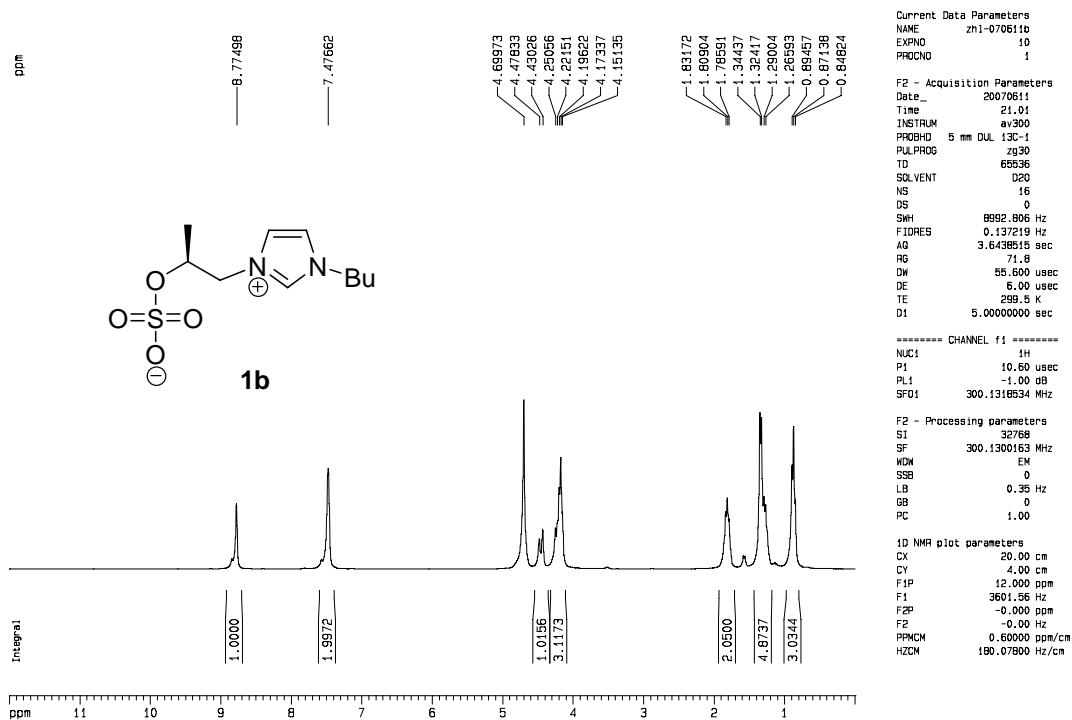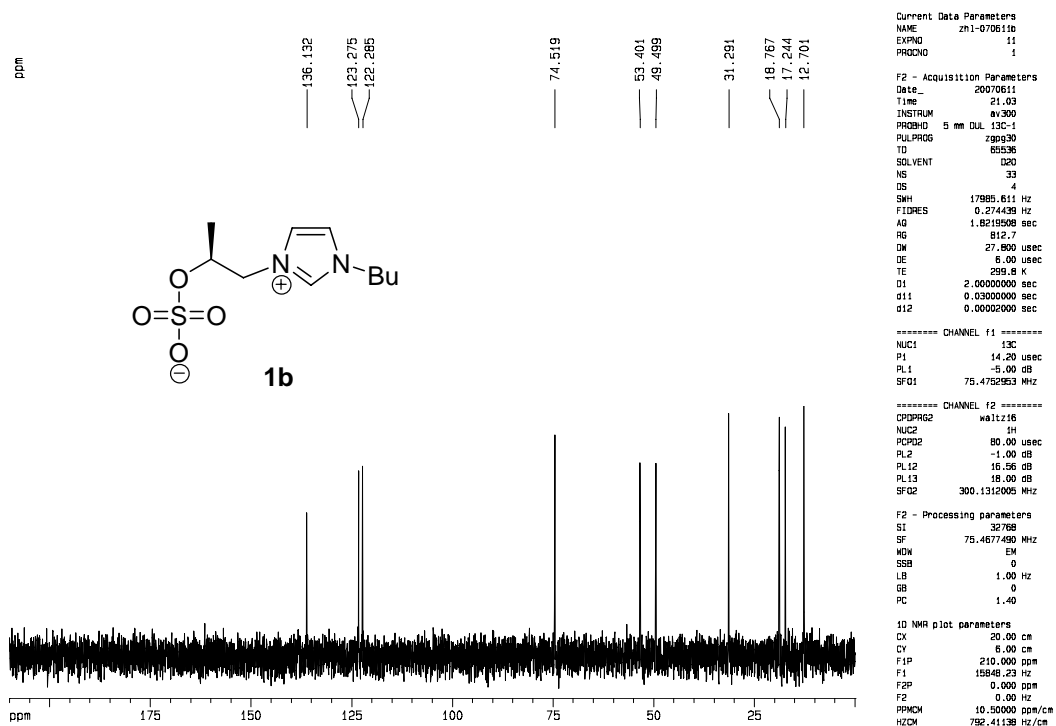

# Supplementary Material (ESI) for Organic and Biomolecular Chemistry  
 # This journal is © The Royal Society of Chemistry 2007

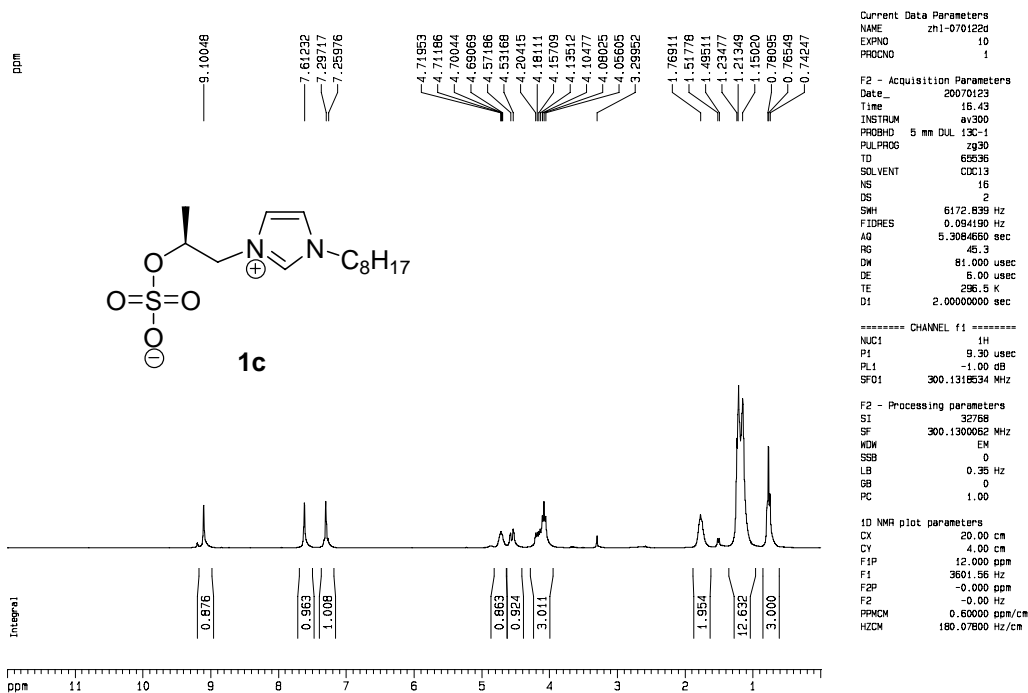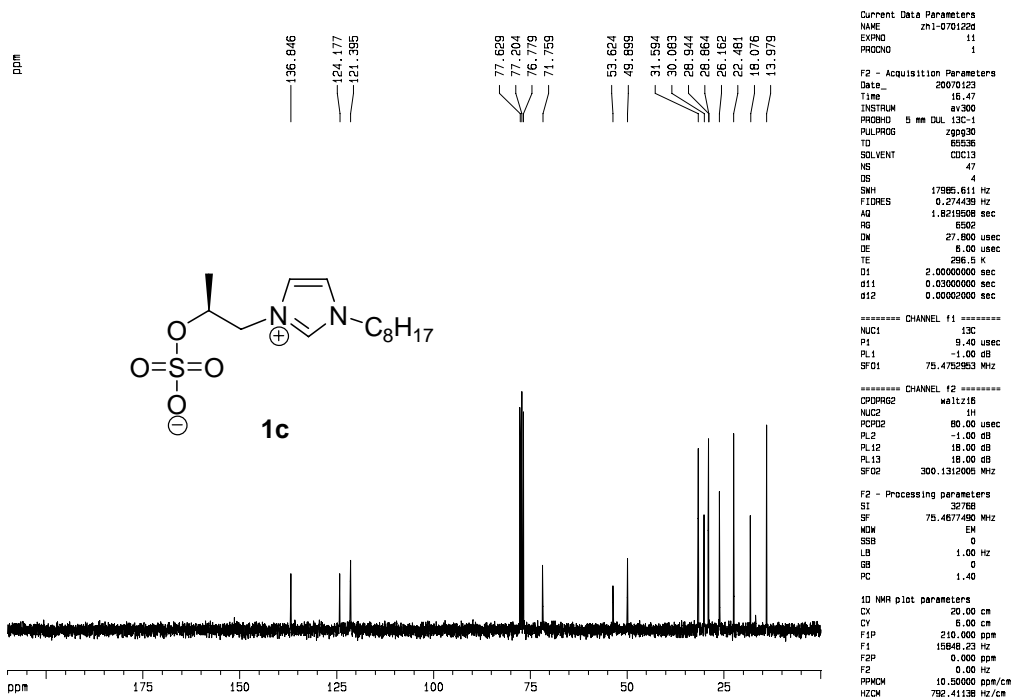

# Supplementary Material (ESI) for Organic and Biomolecular Chemistry  
 # This journal is © The Royal Society of Chemistry 2007

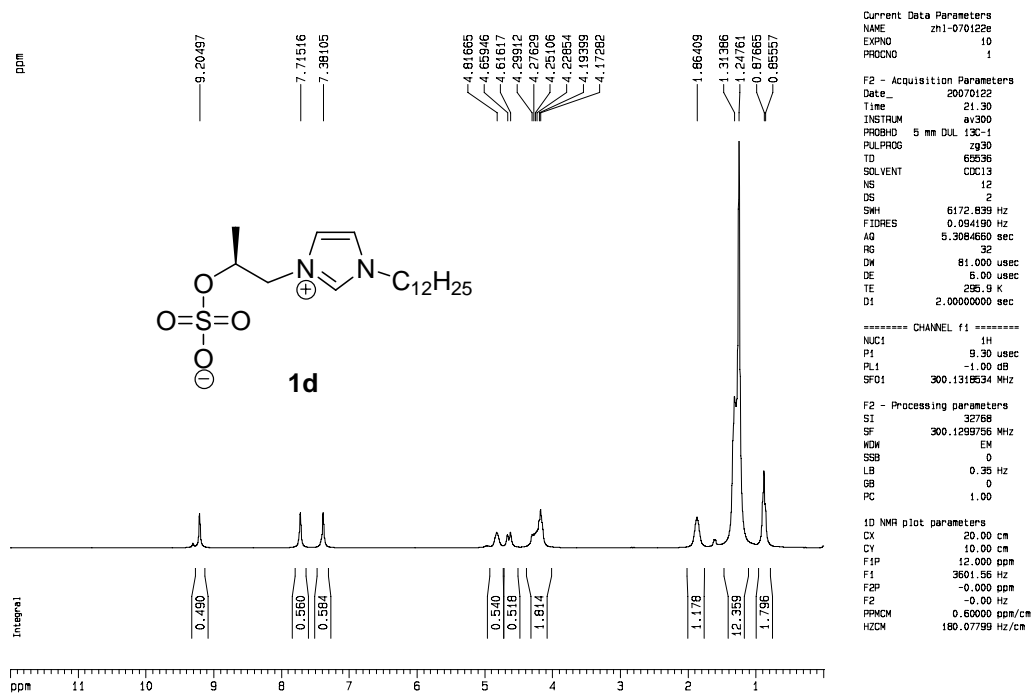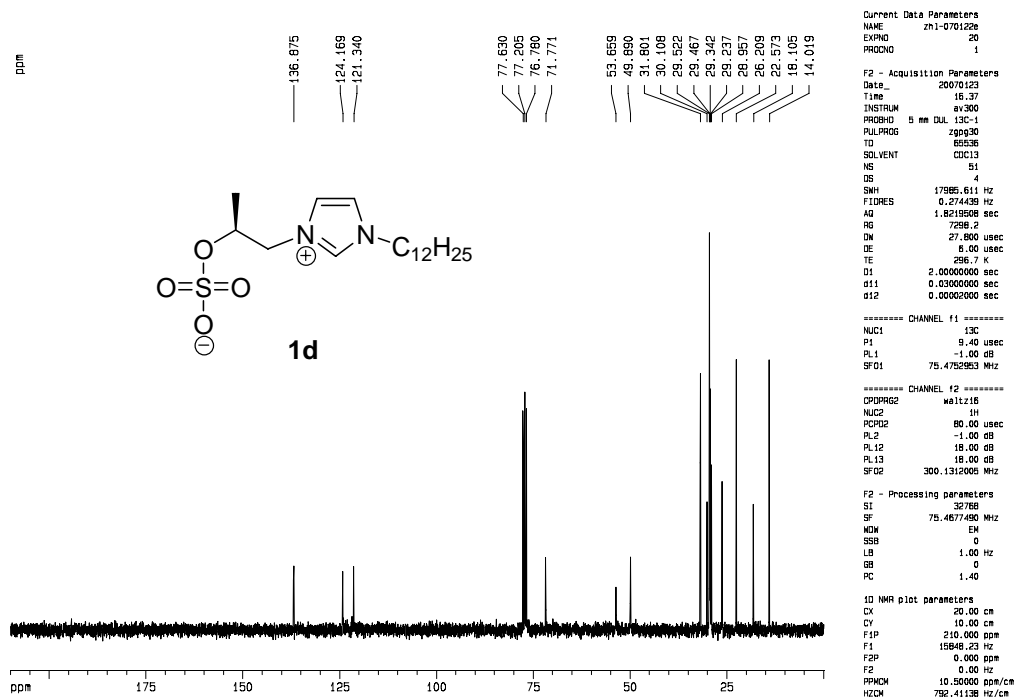



# Supplementary Material (ESI) for Organic and Biomolecular Chemistry  
 # This journal is © The Royal Society of Chemistry 2007

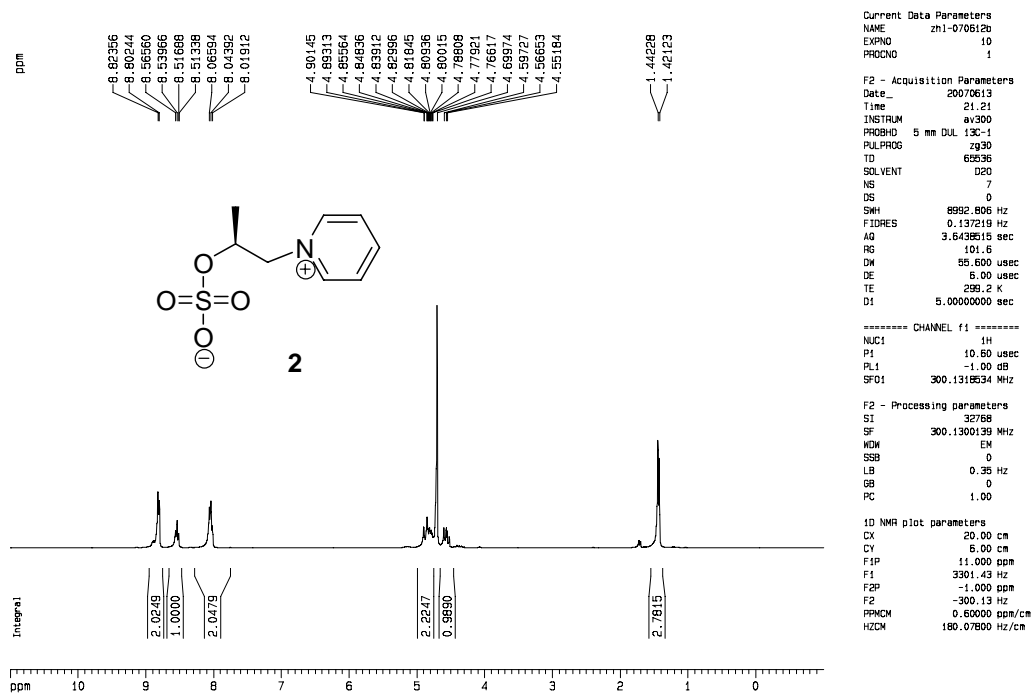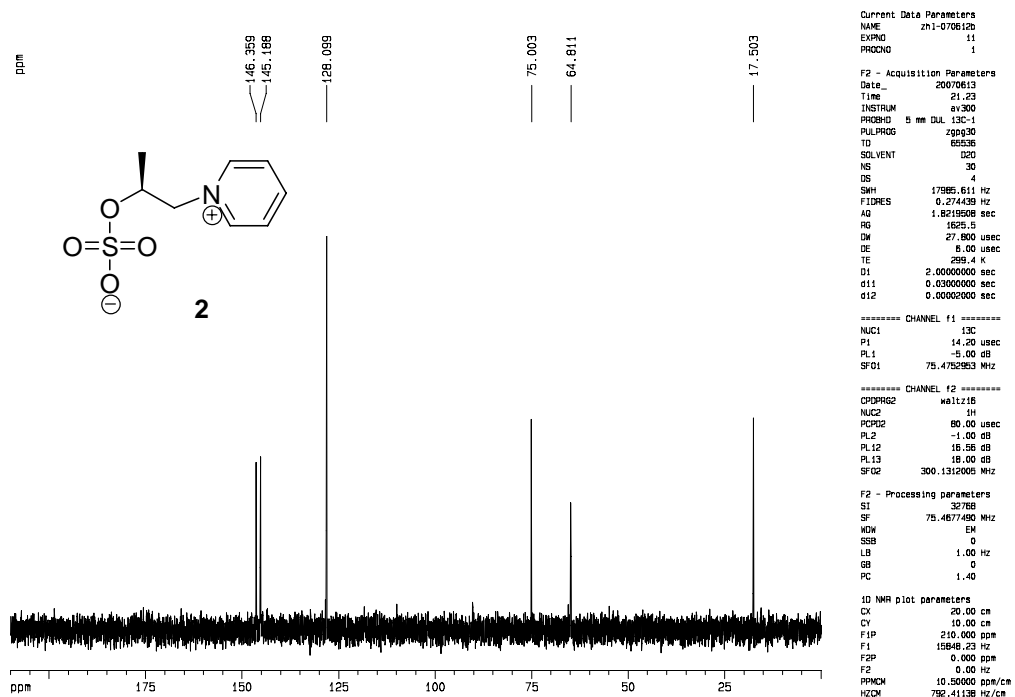

# Supplementary Material (ESI) for Organic and Biomolecular Chemistry  
 # This journal is © The Royal Society of Chemistry 2007

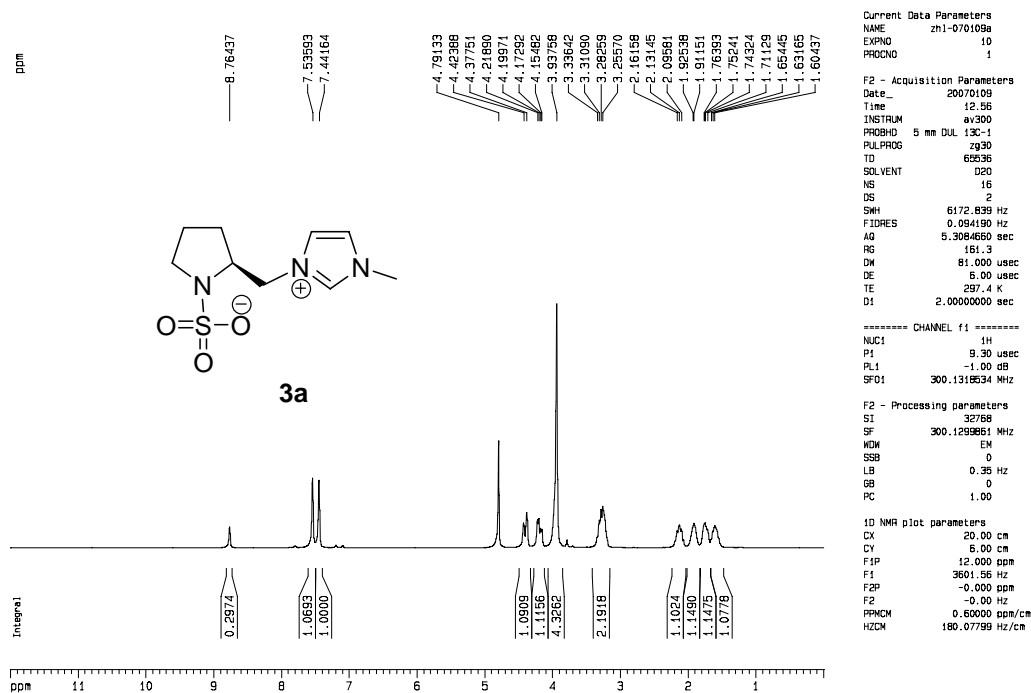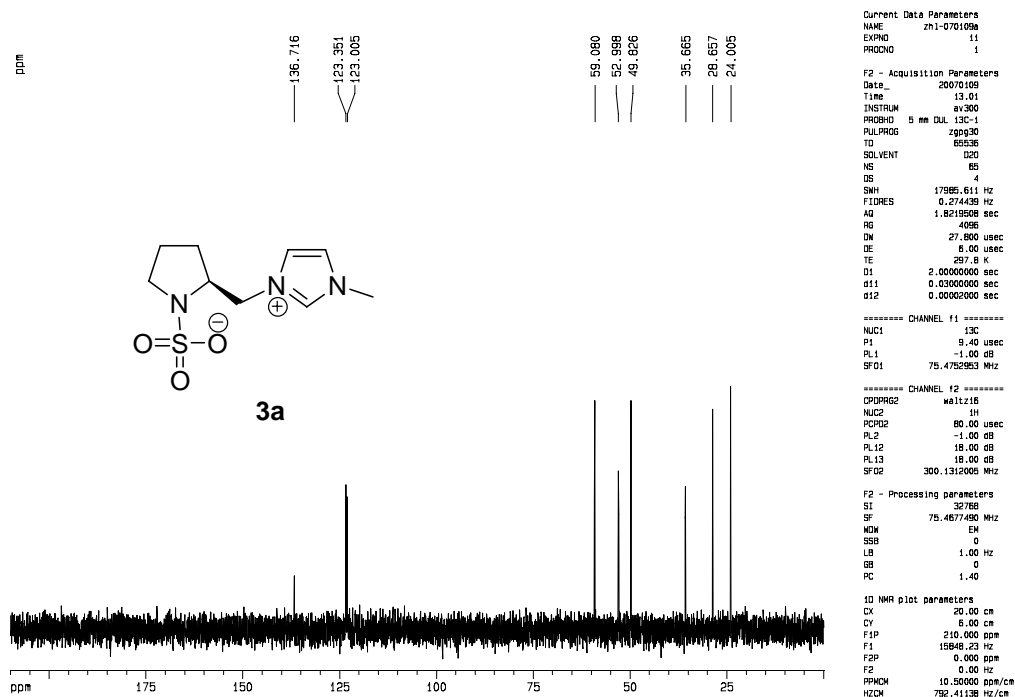

# Supplementary Material (ESI) for Organic and Biomolecular Chemistry  
 # This journal is © The Royal Society of Chemistry 2007

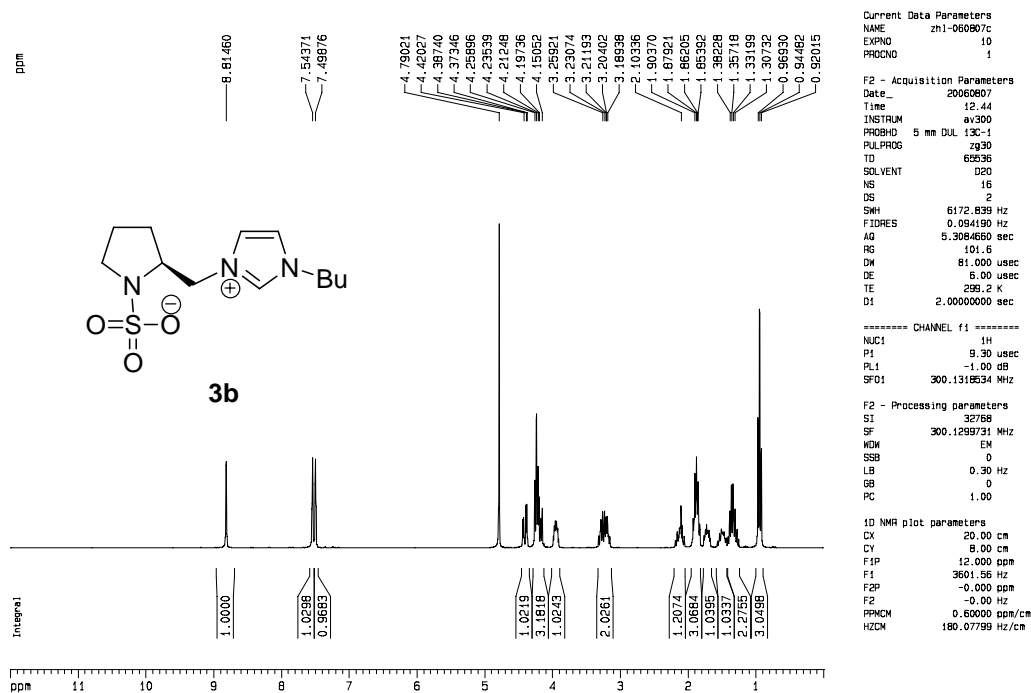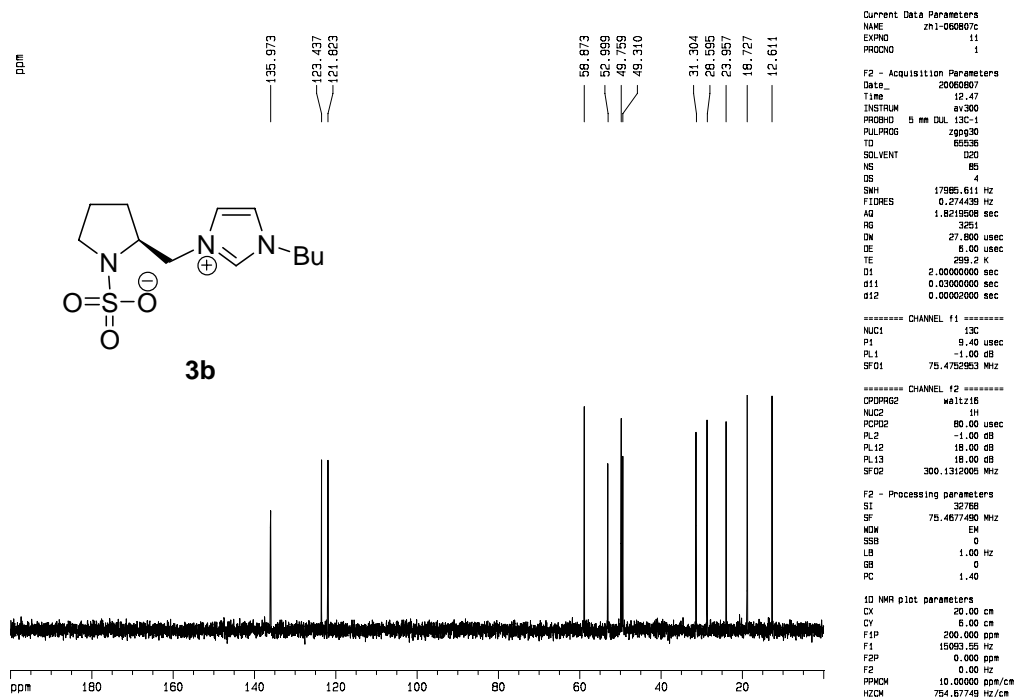

# Supplementary Material (ESI) for Organic and Biomolecular Chemistry  
 # This journal is © The Royal Society of Chemistry 2007

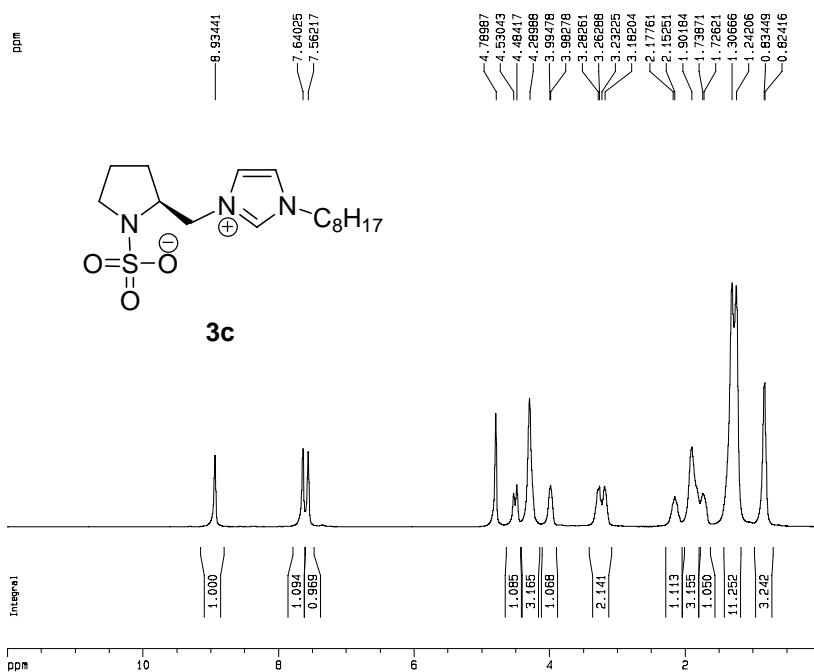

Current Data Parameters  
 NAME znl-070109b  
 EXPNO 10  
 PROCNO 1

F2 - Acquisition Parameters  
 Date\_ 20070109  
 Time 12:44  
 INSTRUM av300  
 PROBHD 5 mm DUL 13C-1  
 PULPROG zg30  
 TD 65536  
 SOLVENT D2O  
 NS 16  
 DS 2  
 SWH 6172.839 Hz  
 FIDRES 0.094190 Hz  
 AQ 5.3084660 sec  
 RG 71.8  
 DM 81.000 usec  
 DE 6.00 usec  
 TE 297.5 K  
 D1 2.0000000 sec

===== CHANNEL f1 =====  
 NUC1 1H  
 P1 9.30 usec  
 PL1 -1.00 dB  
 SFO1 300.1318534 MHz

F2 - Processing parameters  
 S1 32768  
 SF 300.1299837 MHz  
 MDW EM  
 SSB 0  
 LB 0.35 Hz  
 GB 0  
 PC 1.00

ID NMR plot parameters  
 CX 20.00 cm  
 CY 6.00 cm  
 F1P 12.000 ppm  
 F1 3601.56 Hz  
 F2P -0.000 ppm  
 F2 -0.00 Hz  
 FPCMC 0.60000 ppm/cm  
 HZCM 180.07799 Hz/cm

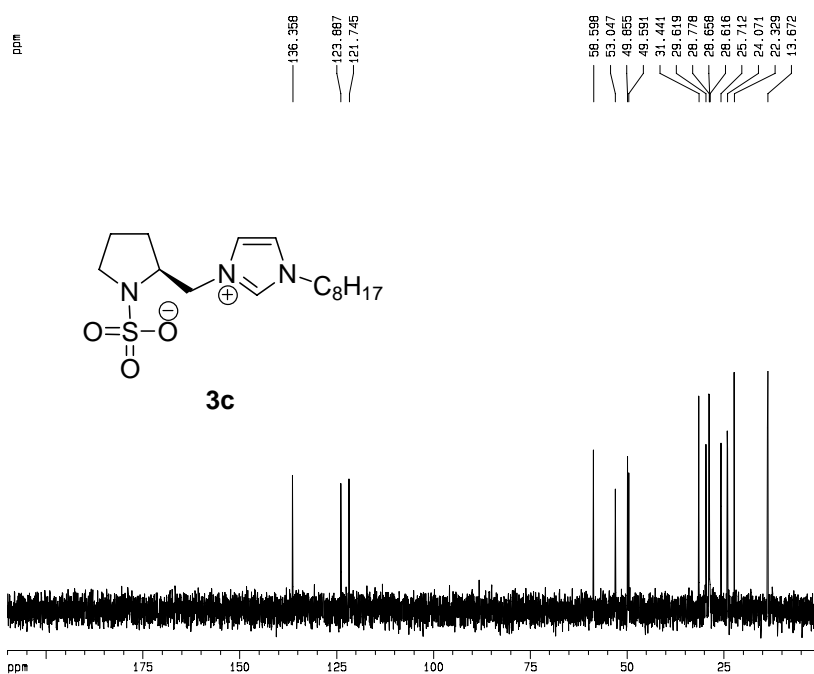

Current Data Parameters  
 NAME znl-070109b  
 EXPNO 11  
 PROCNO 1

F2 - Acquisition Parameters  
 Date\_ 20070109  
 Time 12:49  
 INSTRUM av300  
 PROBHD 5 mm DUL 13C-1  
 PULPROG zgpg30  
 TD 65536  
 SOLVENT D2O  
 NS 82  
 DS 4  
 SWH 17865.611 Hz  
 FIDRES 0.274459 Hz  
 AQ 1.8219508 sec  
 RG 3649.1  
 DM 27.800 usec  
 DE 8.00 usec  
 TE 297.7 K  
 D1 2.0000000 sec  
 d11 0.0300000 sec  
 d12 0.0002000 sec

===== CHANNEL f1 =====  
 NUC1 13C  
 P1 9.40 usec  
 PL1 -1.00 dB  
 SFO1 75.4782983 MHz

===== CHANNEL f2 =====  
 CPDPRG2 waltz16  
 NUC2 1H  
 PCPD2 80.00 usec  
 PL2 -1.00 dB  
 PL12 18.00 dB  
 PL13 18.00 dB  
 SFO2 300.1318505 MHz

F2 - Processing parameters  
 S1 32768  
 SF 75.4677490 MHz  
 MDW EM  
 SSB 0  
 LB 1.00 Hz  
 GB 0  
 PC 1.40

ID NMR plot parameters  
 CX 20.00 cm  
 CY 6.00 cm  
 F1P 210.000 ppm  
 F1 15846.23 Hz  
 F2P 0.000 ppm  
 F2 0.00 Hz  
 FPCMC 10.50000 ppm/cm  
 HZCM 792.41138 Hz/cm

# Supplementary Material (ESI) for Organic and Biomolecular Chemistry  
 # This journal is © The Royal Society of Chemistry 2007

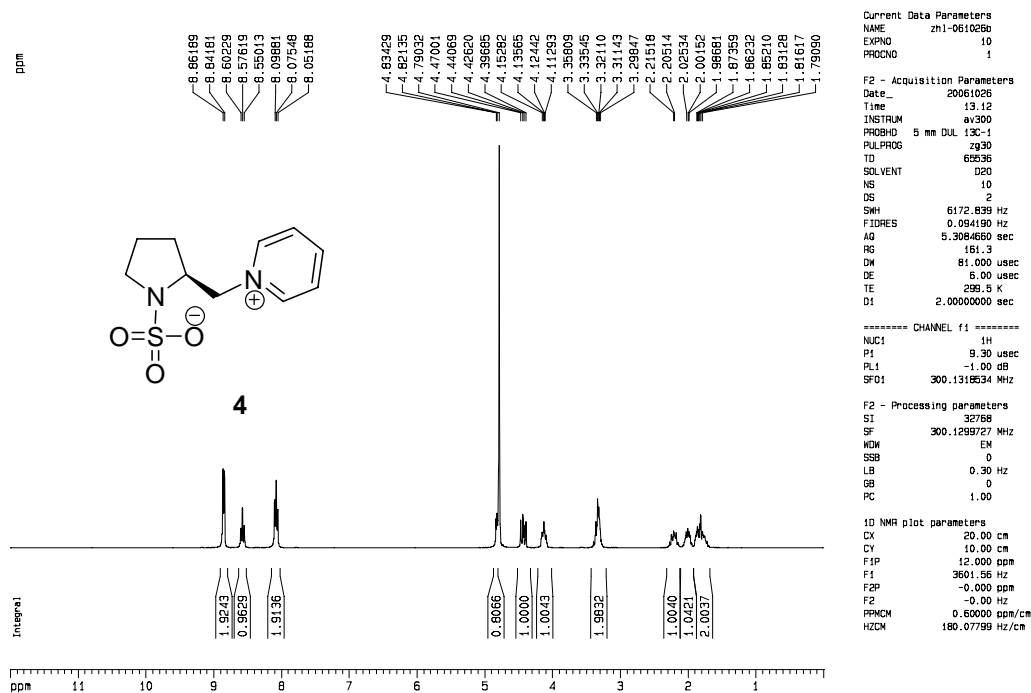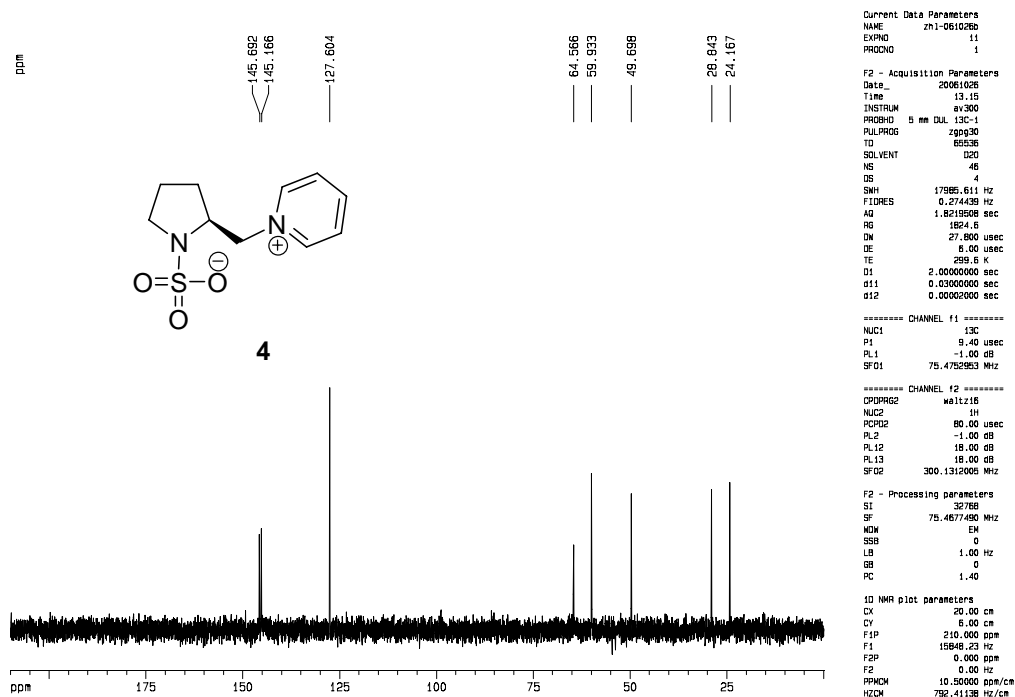

# Supplementary Material (ESI) for Organic and Biomolecular Chemistry  
 # This journal is © The Royal Society of Chemistry 2007

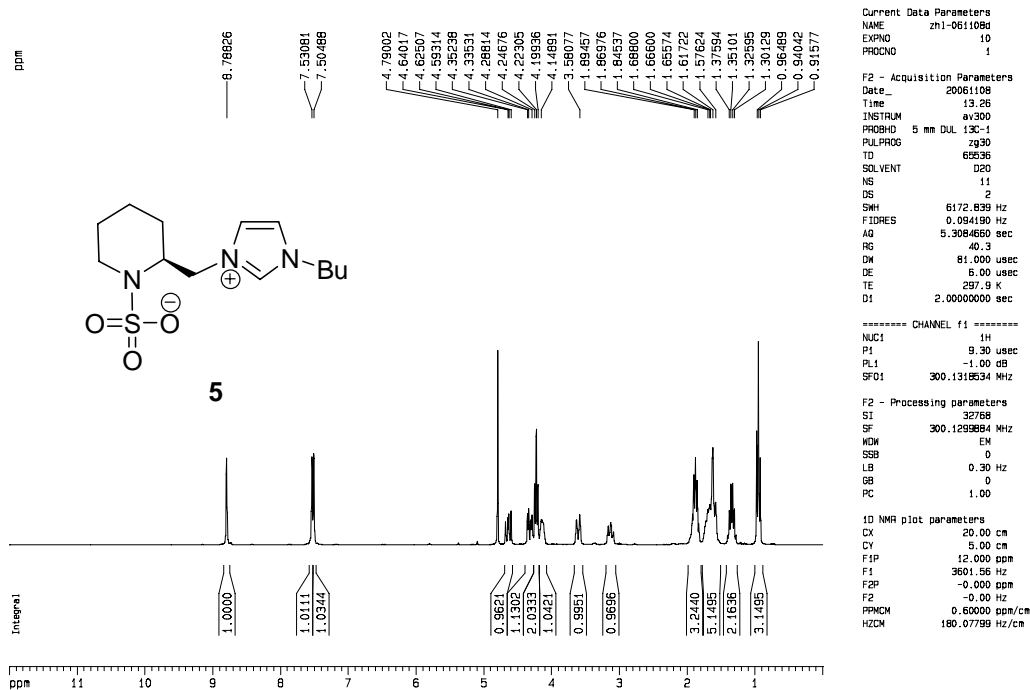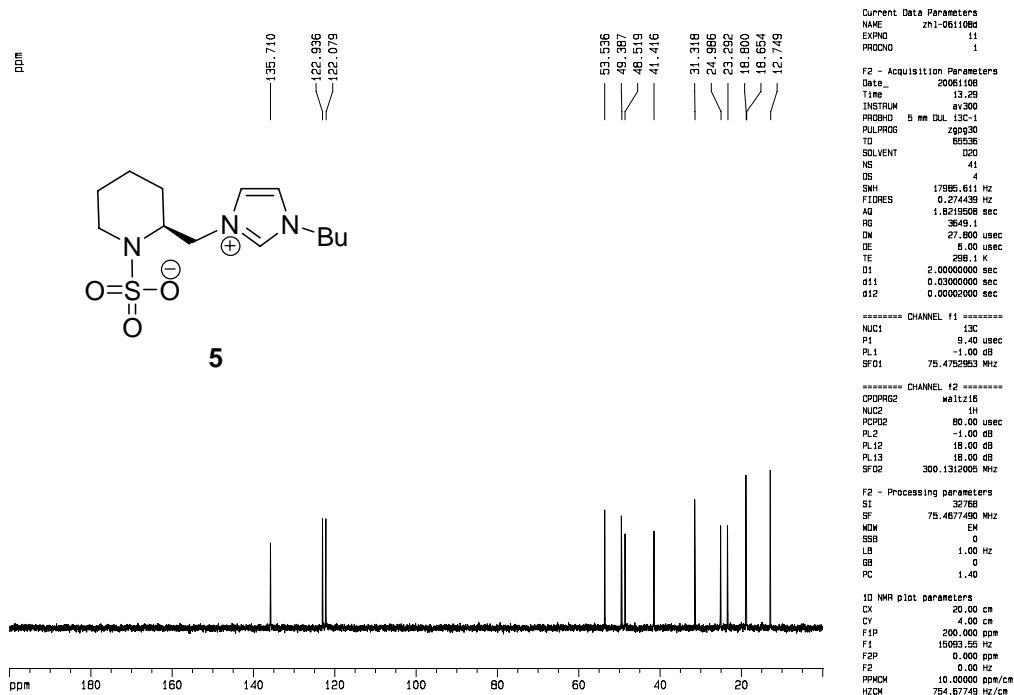

# Supplementary Material (ESI) for Organic and Biomolecular Chemistry  
 # This journal is © The Royal Society of Chemistry 2007

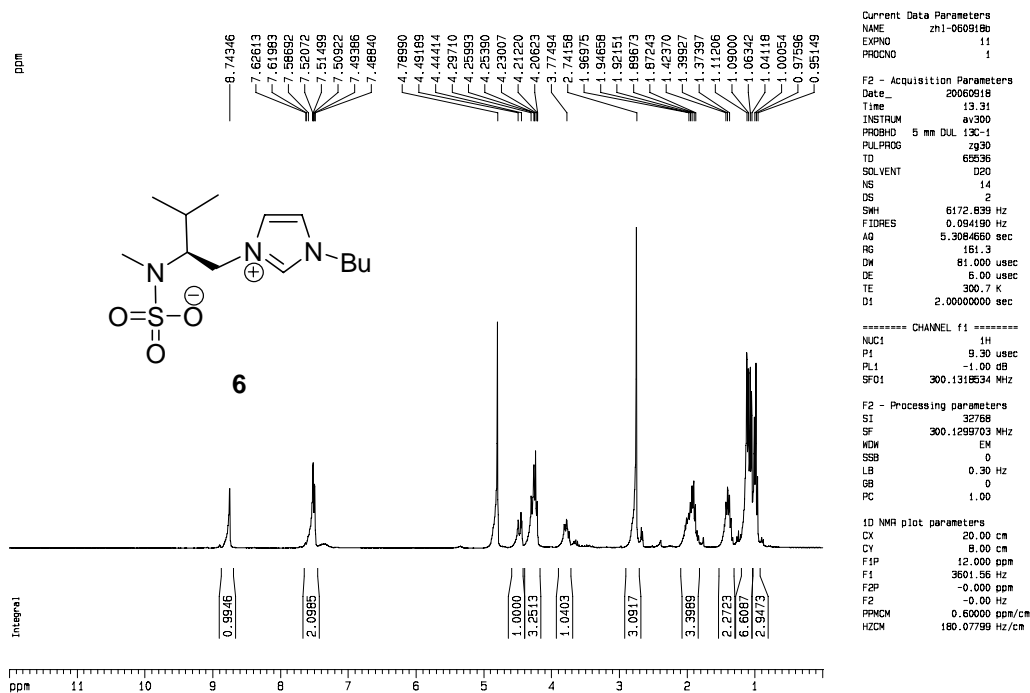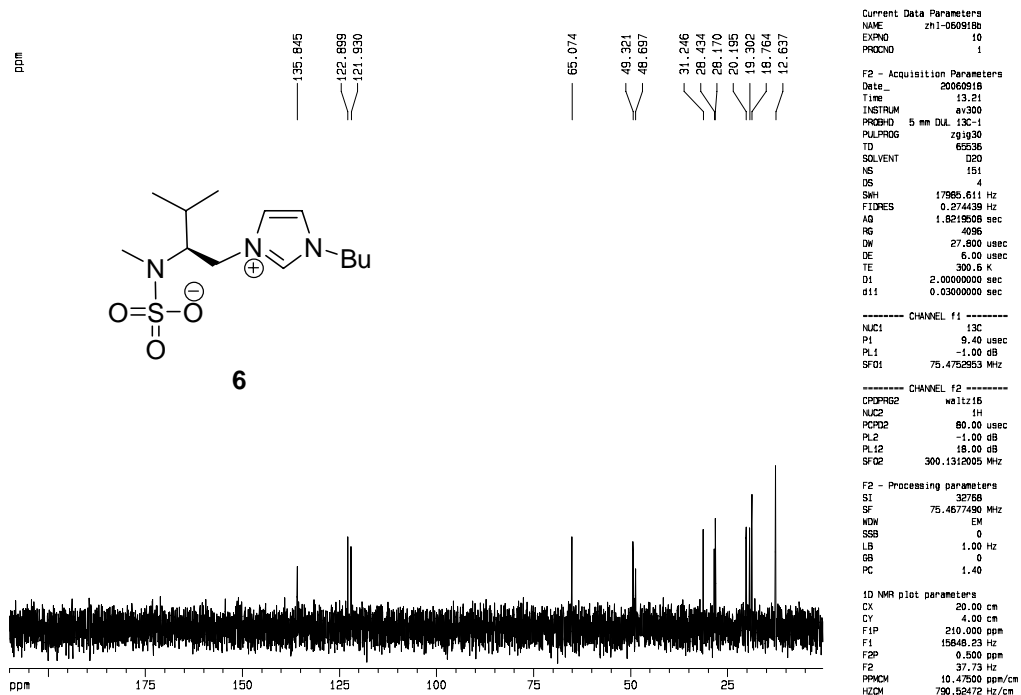

# Supplementary Material (ESI) for Organic and Biomolecular Chemistry  
 # This journal is © The Royal Society of Chemistry 2007

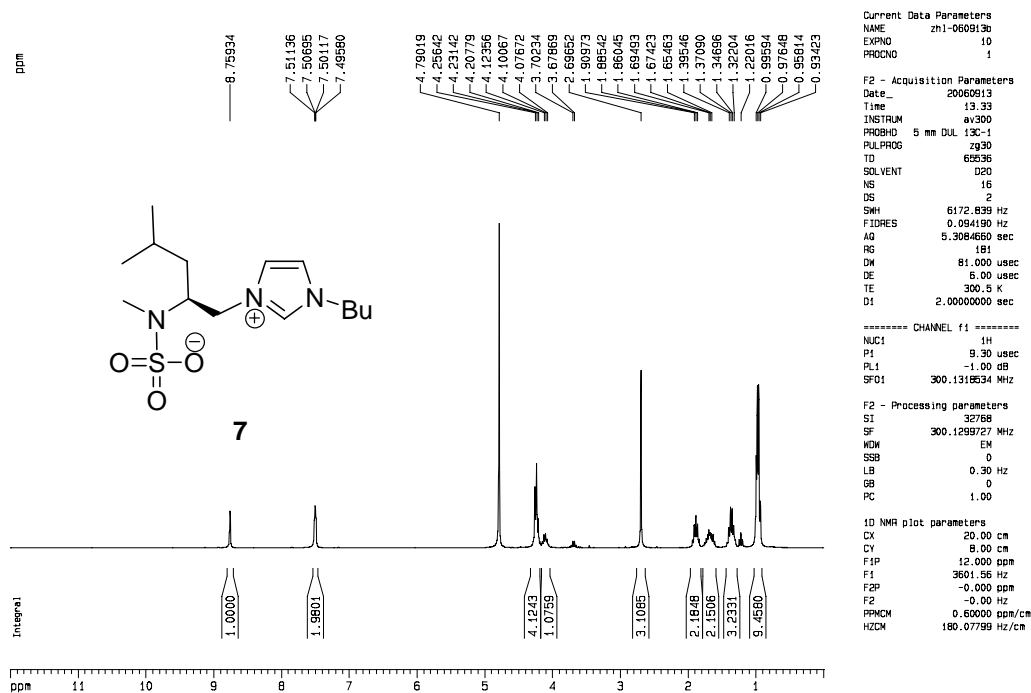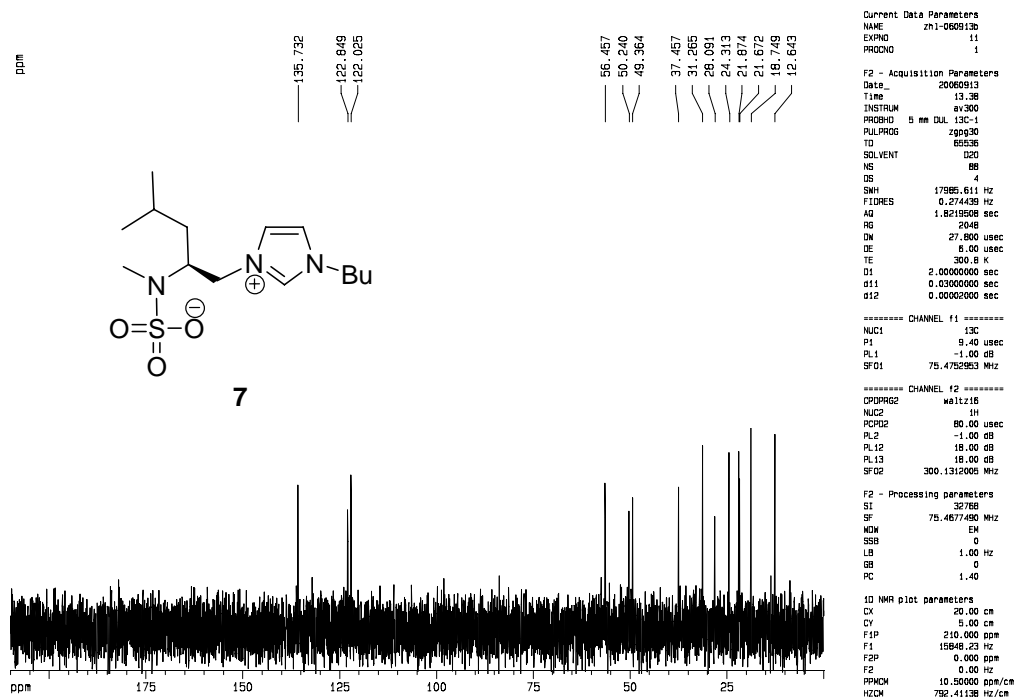



# Supplementary Material (ESI) for Organic and Biomolecular Chemistry  
 # This journal is © The Royal Society of Chemistry 2007

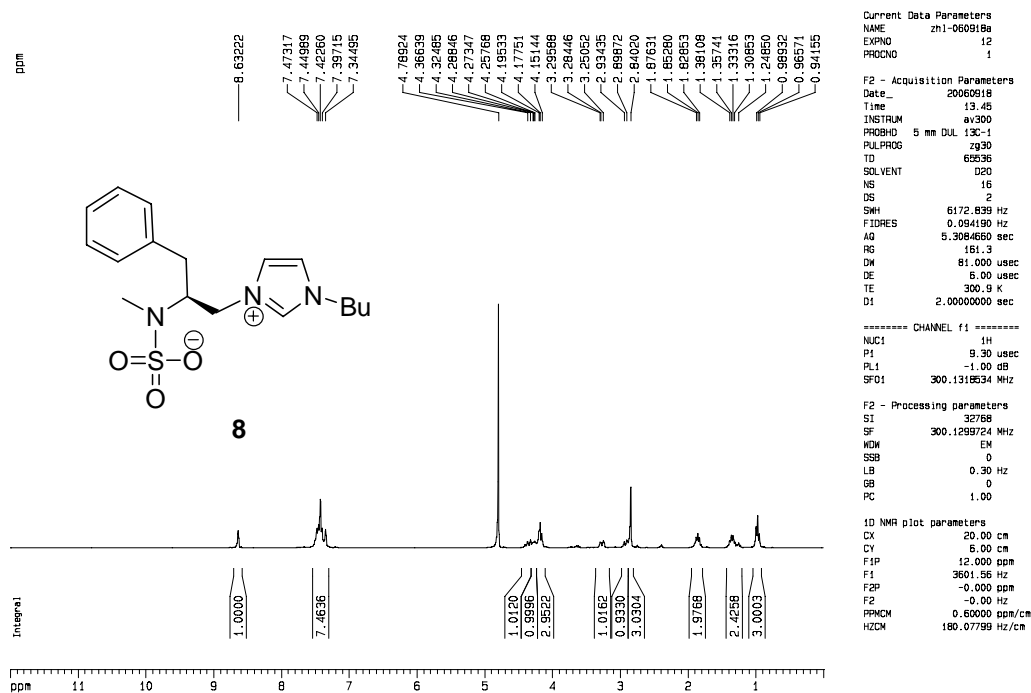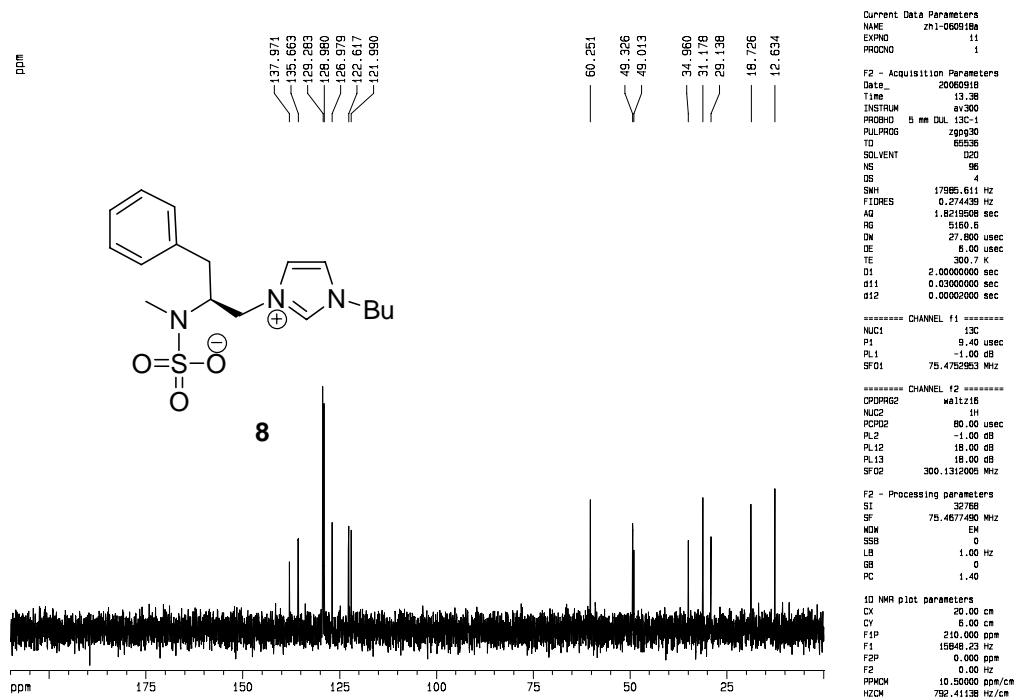

# Supplementary Material (ESI) for Organic and Biomolecular Chemistry  
 # This journal is © The Royal Society of Chemistry 2007

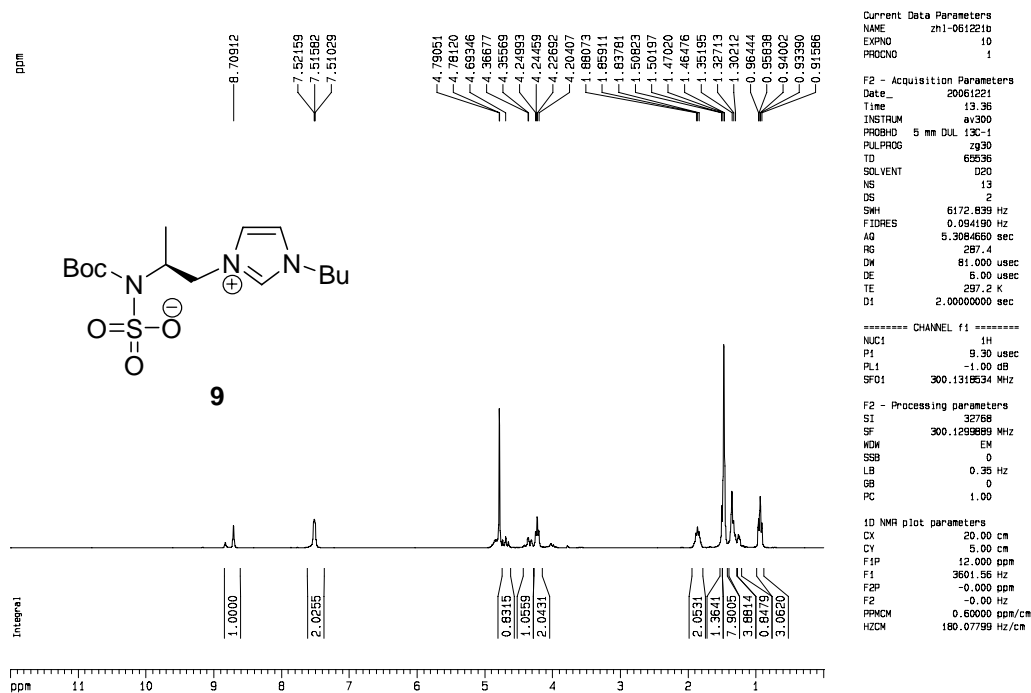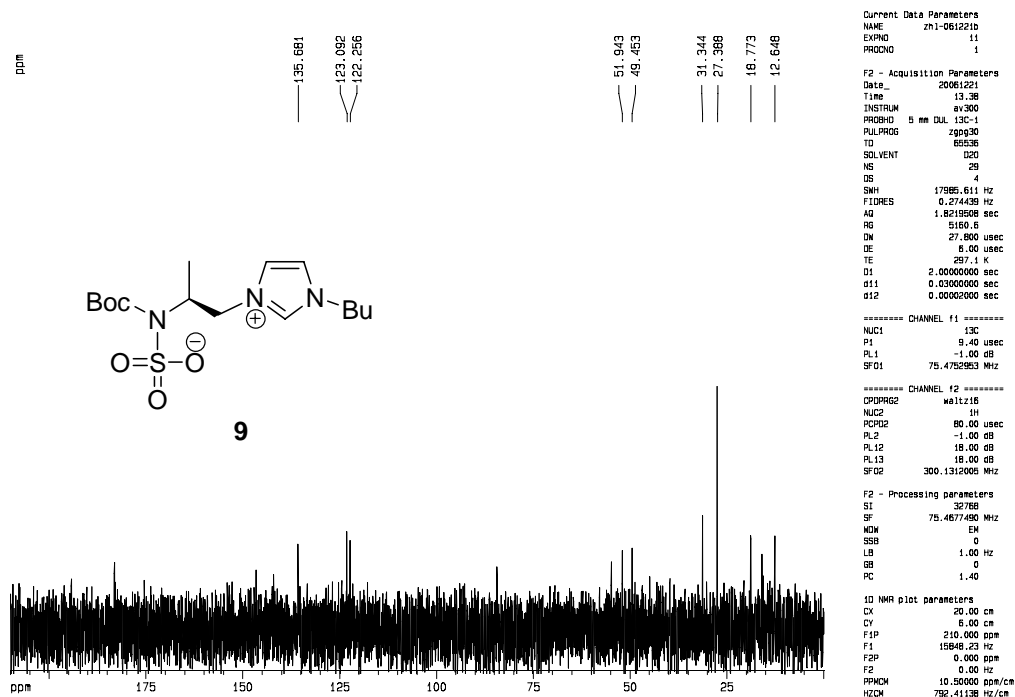

# Supplementary Material (ESI) for Organic and Biomolecular Chemistry  
 # This journal is © The Royal Society of Chemistry 2007

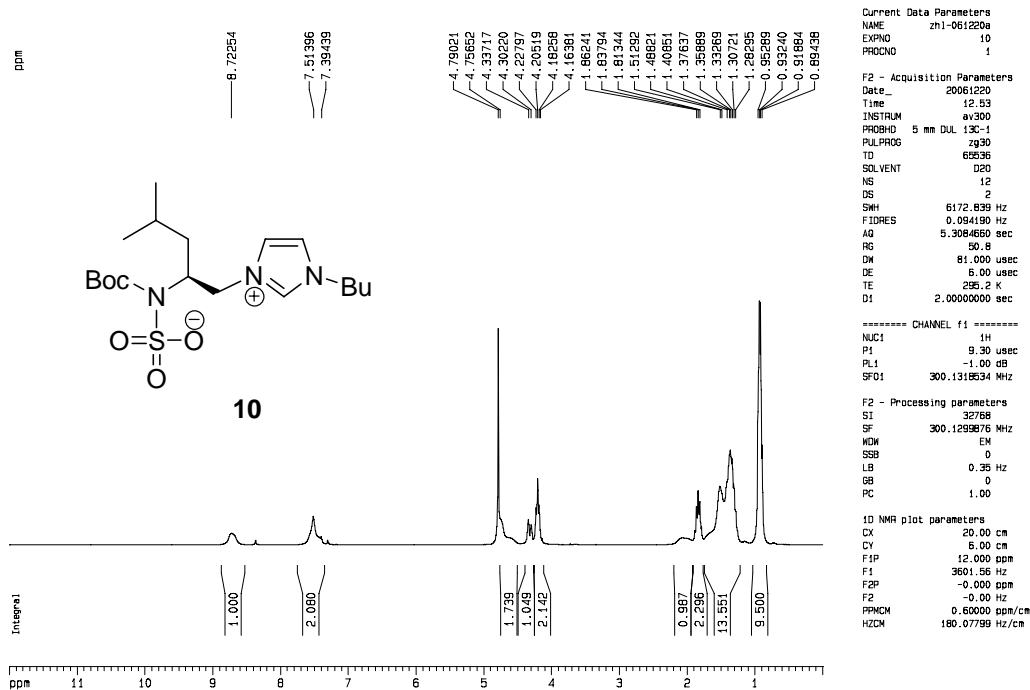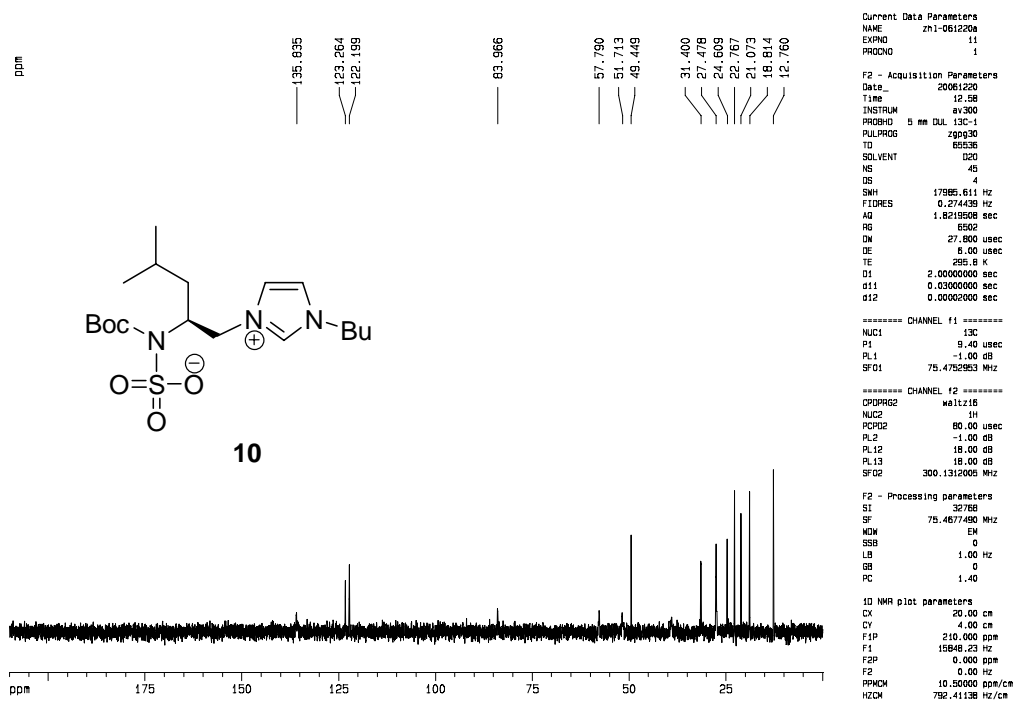

# Supplementary Material (ESI) for Organic and Biomolecular Chemistry  
 # This journal is © The Royal Society of Chemistry 2007

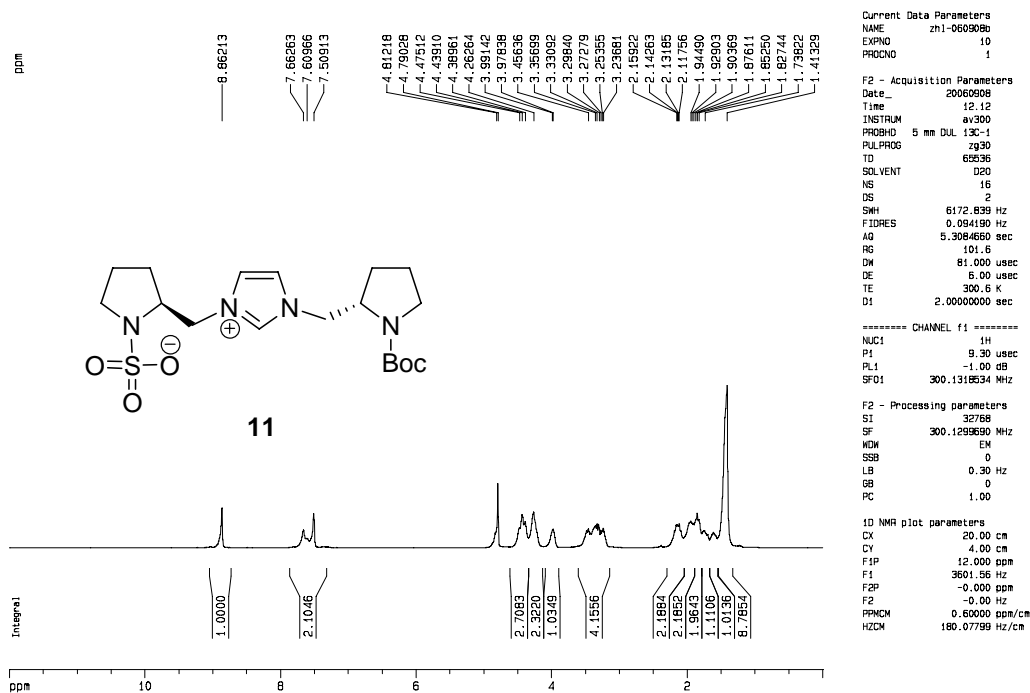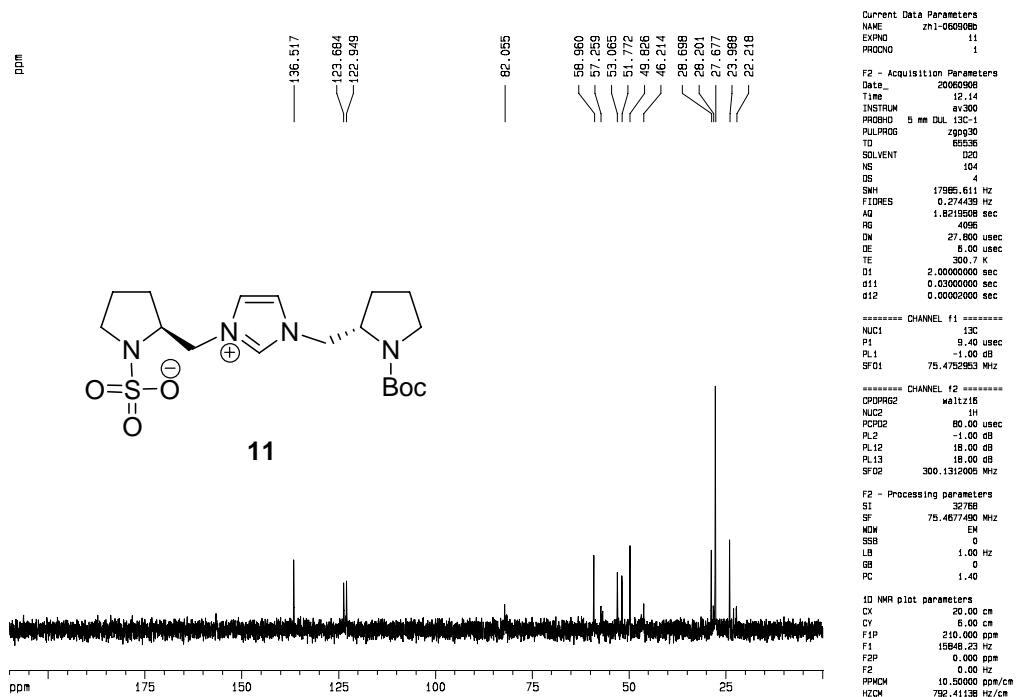

# Supplementary Material (ESI) for Organic and Biomolecular Chemistry  
 # This journal is © The Royal Society of Chemistry 2007

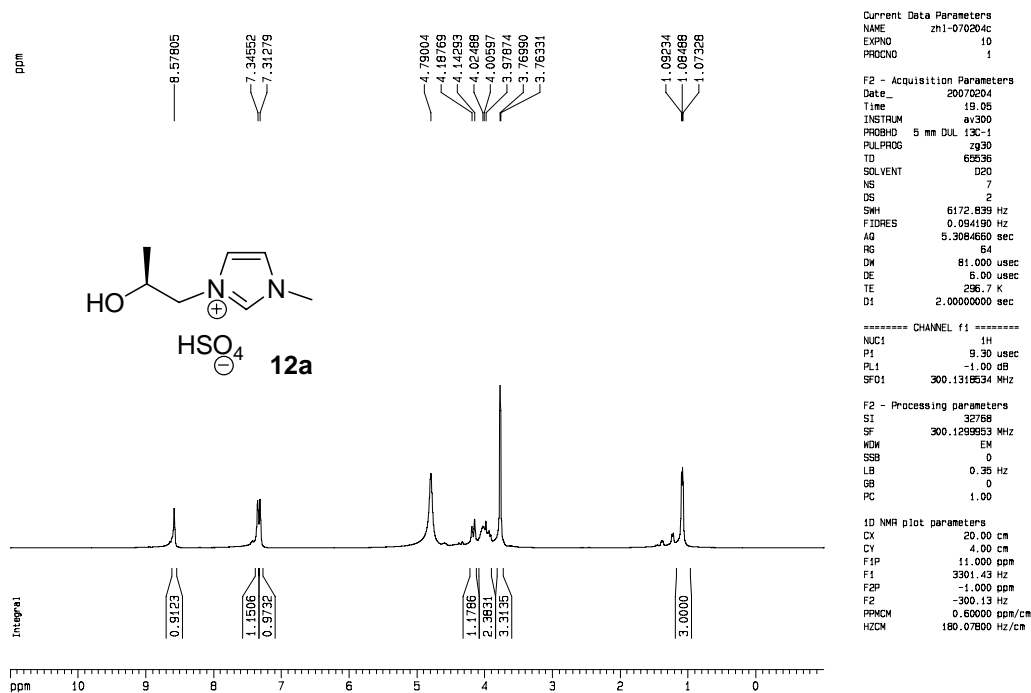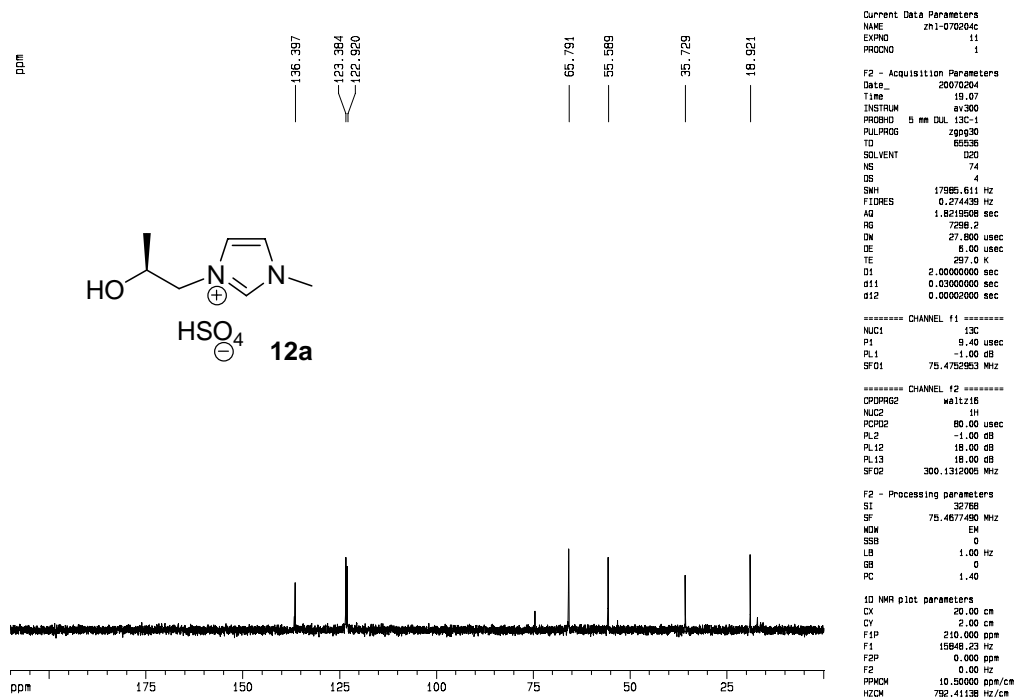

# Supplementary Material (ESI) for Organic and Biomolecular Chemistry  
 # This journal is © The Royal Society of Chemistry 2007

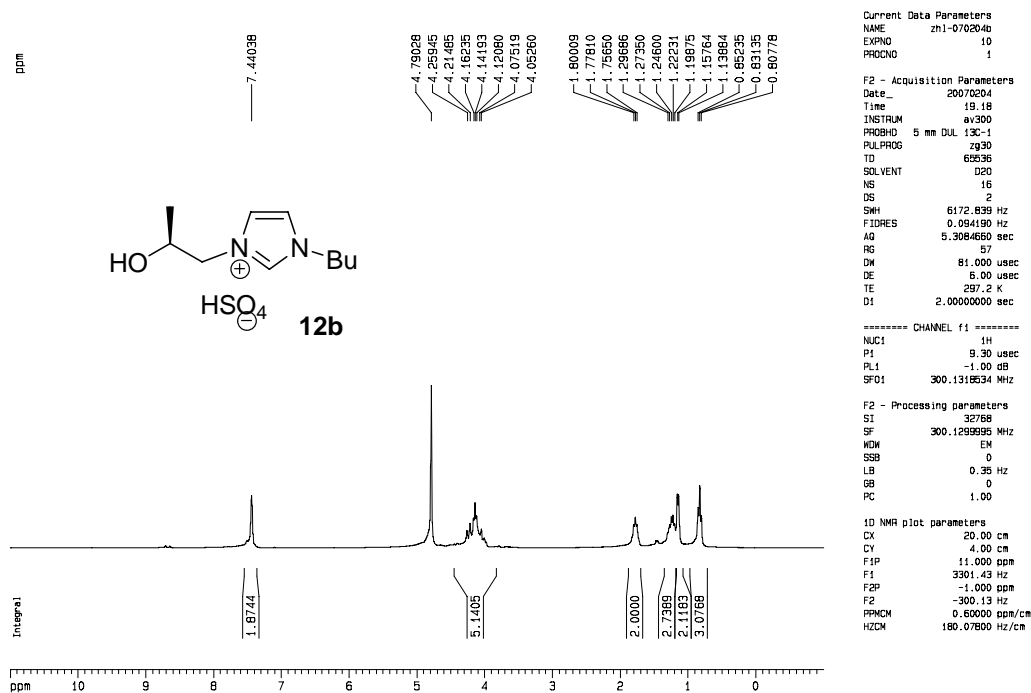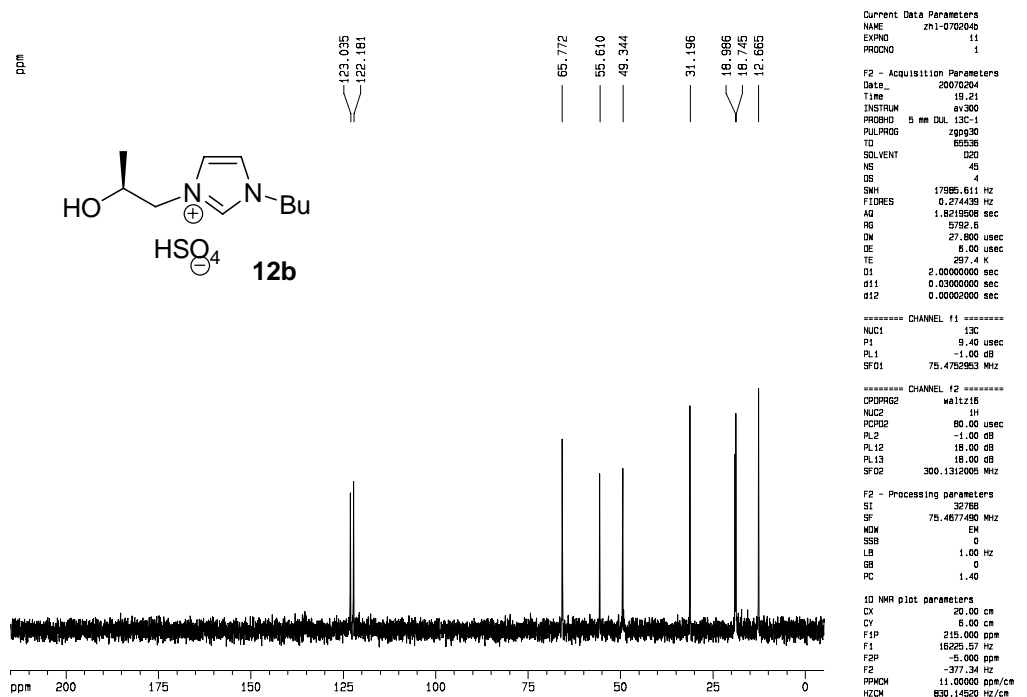

# Supplementary Material (ESI) for Organic and Biomolecular Chemistry  
 # This journal is © The Royal Society of Chemistry 2007

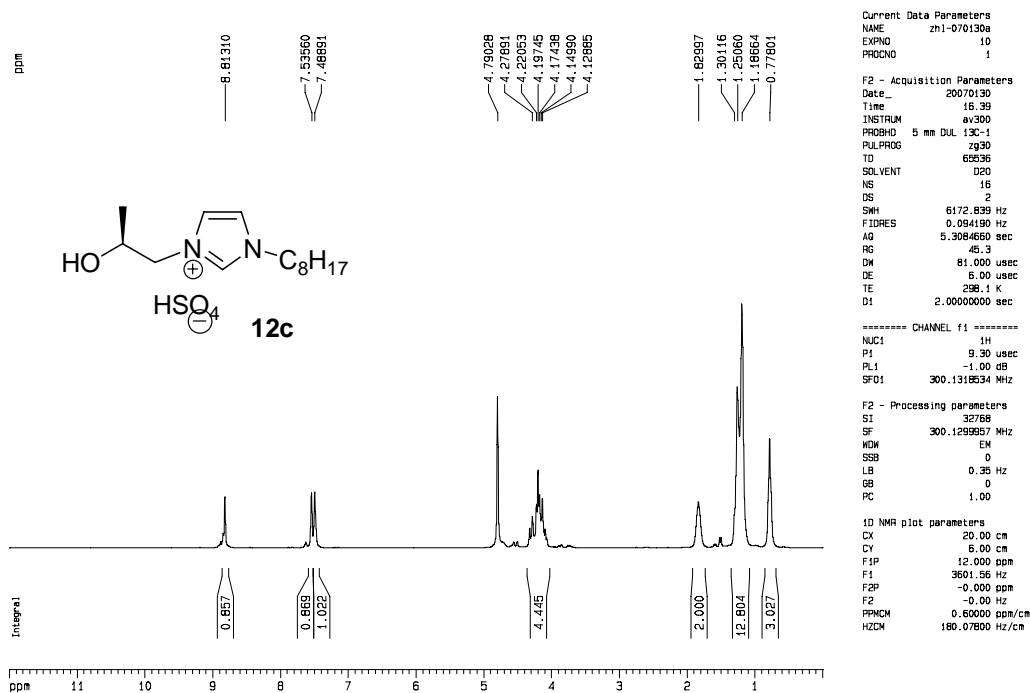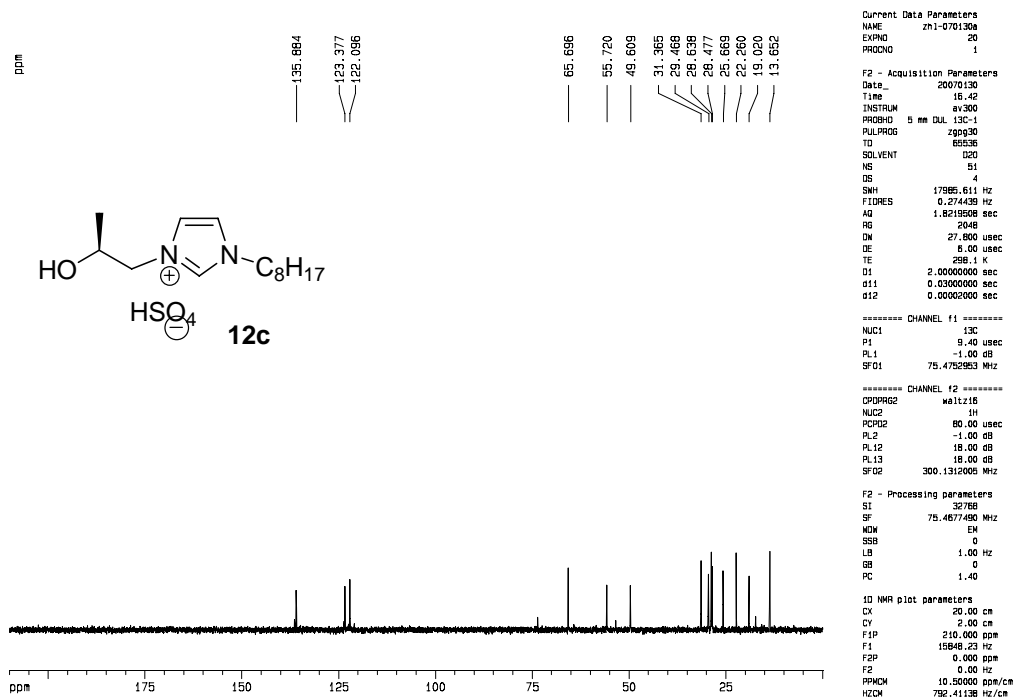

# Supplementary Material (ESI) for Organic and Biomolecular Chemistry  
 # This journal is © The Royal Society of Chemistry 2007

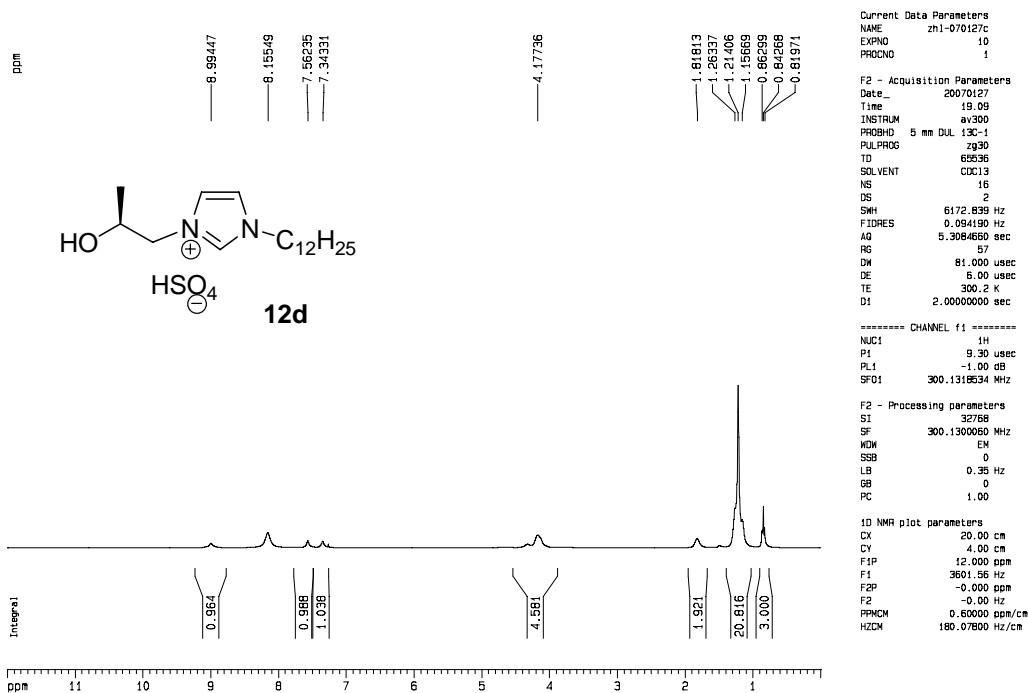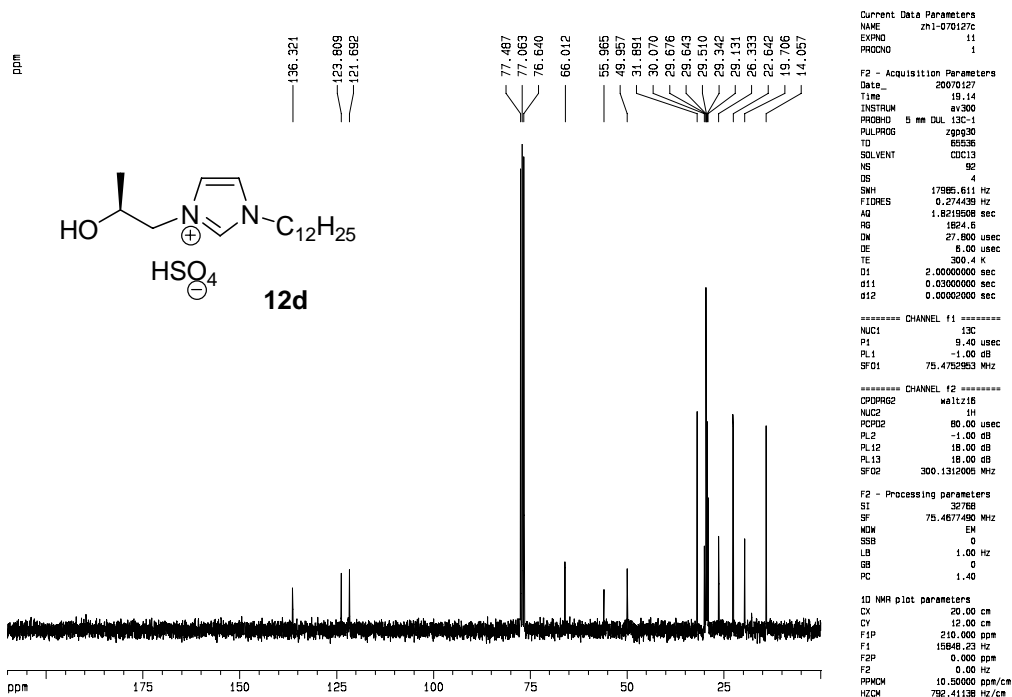



# Supplementary Material (ESI) for Organic and Biomolecular Chemistry  
 # This journal is © The Royal Society of Chemistry 2007

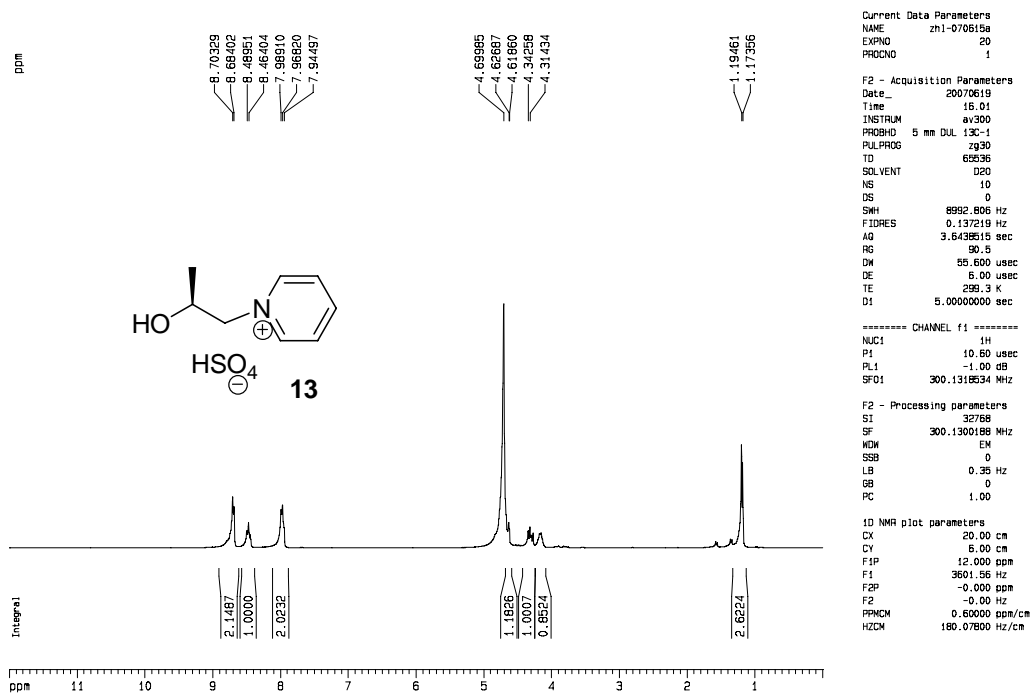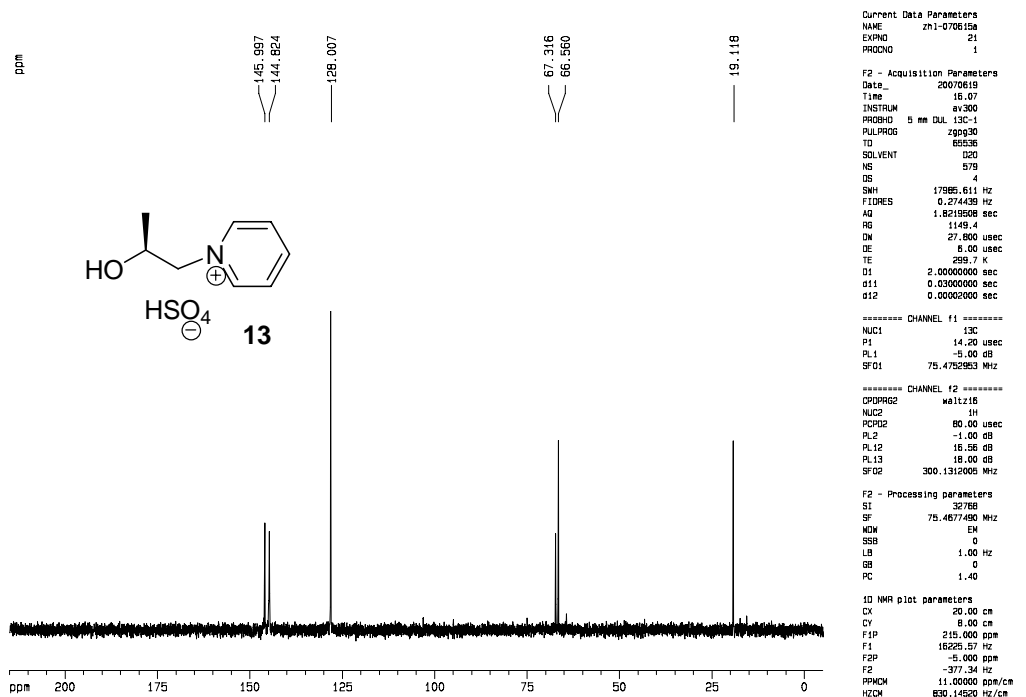

# Supplementary Material (ESI) for Organic and Biomolecular Chemistry  
 # This journal is © The Royal Society of Chemistry 2007

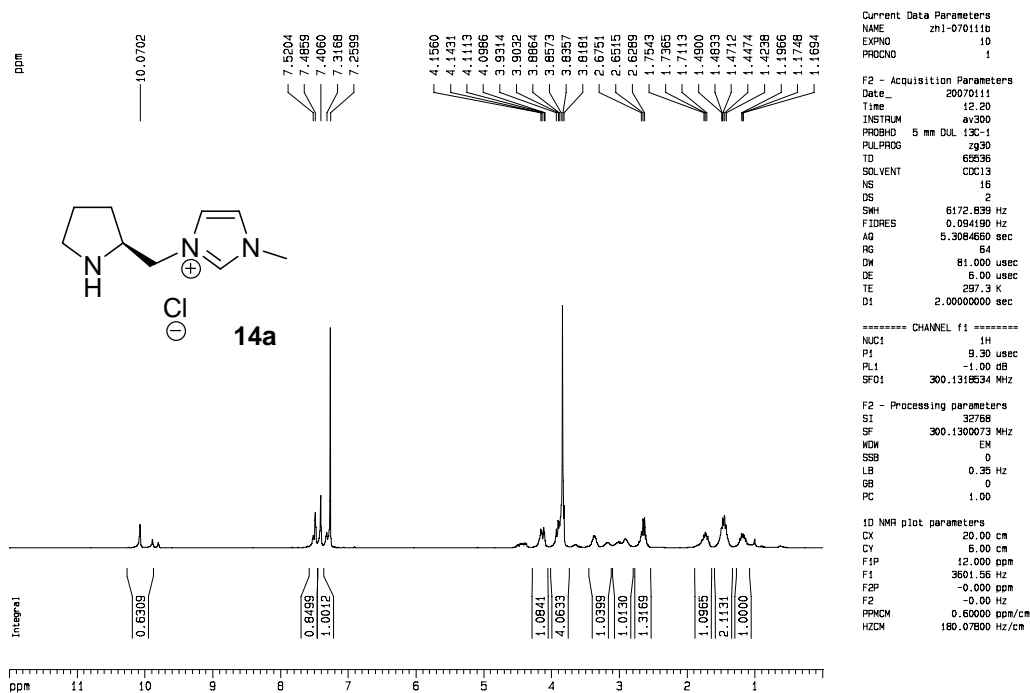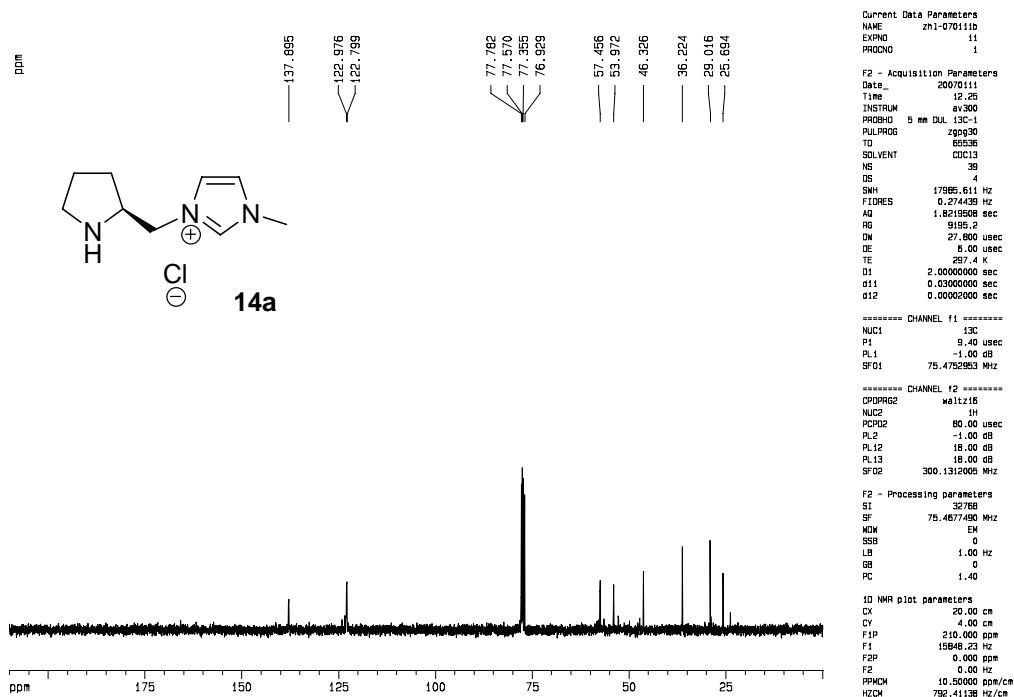

# Supplementary Material (ESI) for Organic and Biomolecular Chemistry  
 # This journal is © The Royal Society of Chemistry 2007

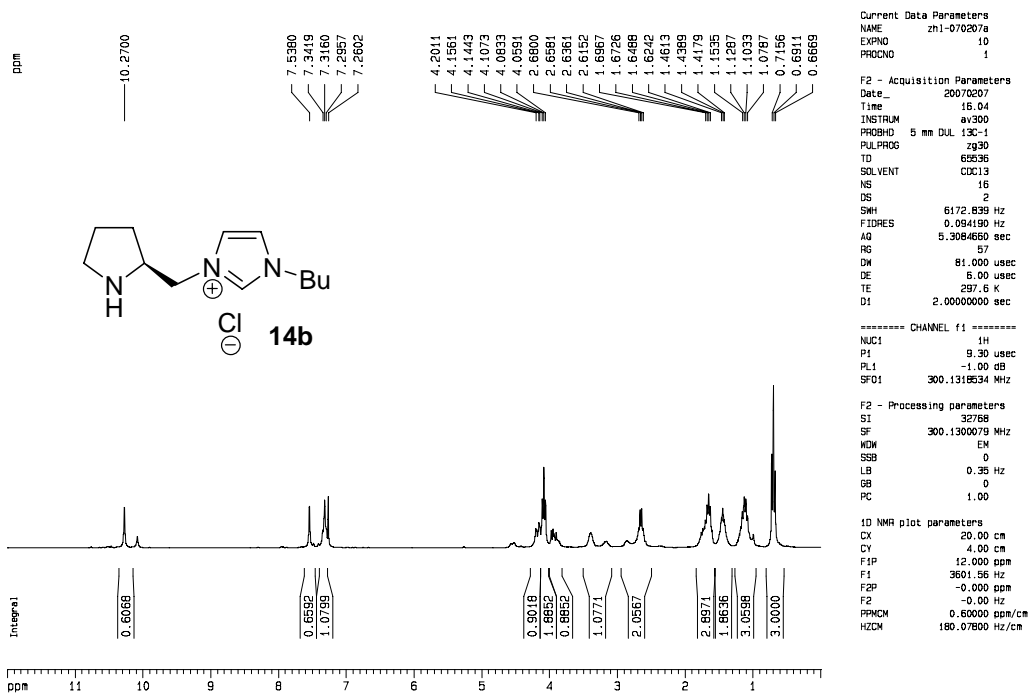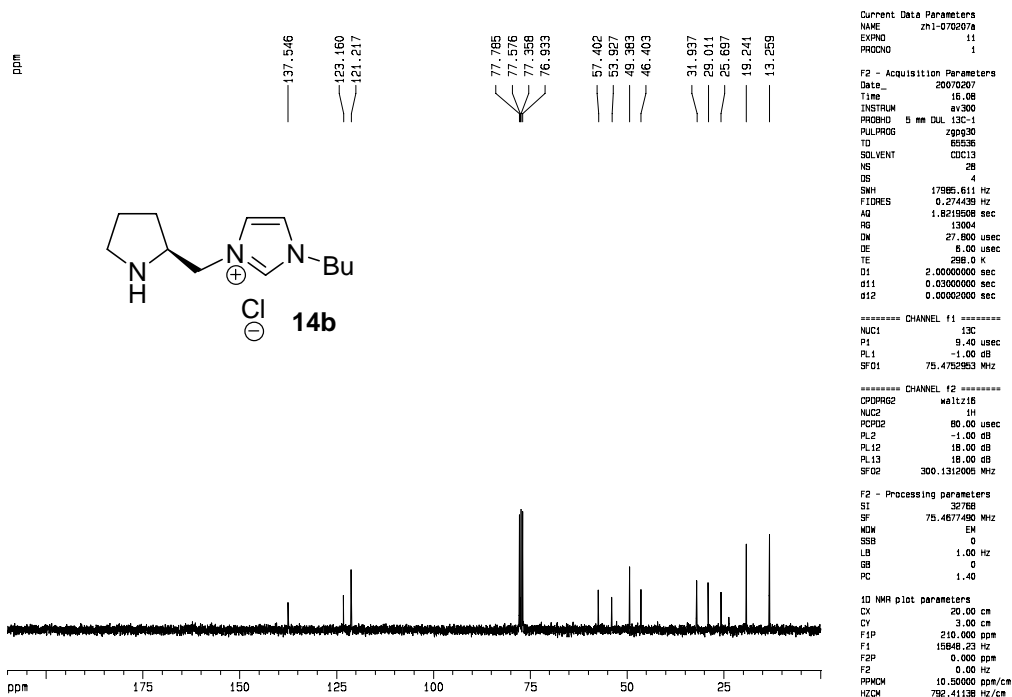

# Supplementary Material (ESI) for Organic and Biomolecular Chemistry  
 # This journal is © The Royal Society of Chemistry 2007

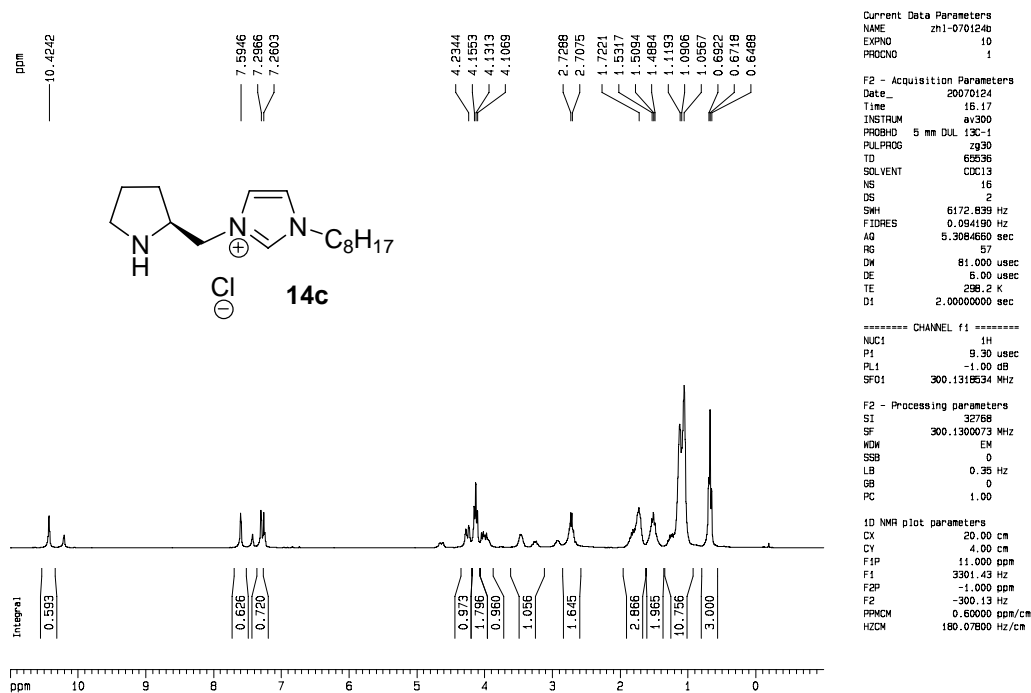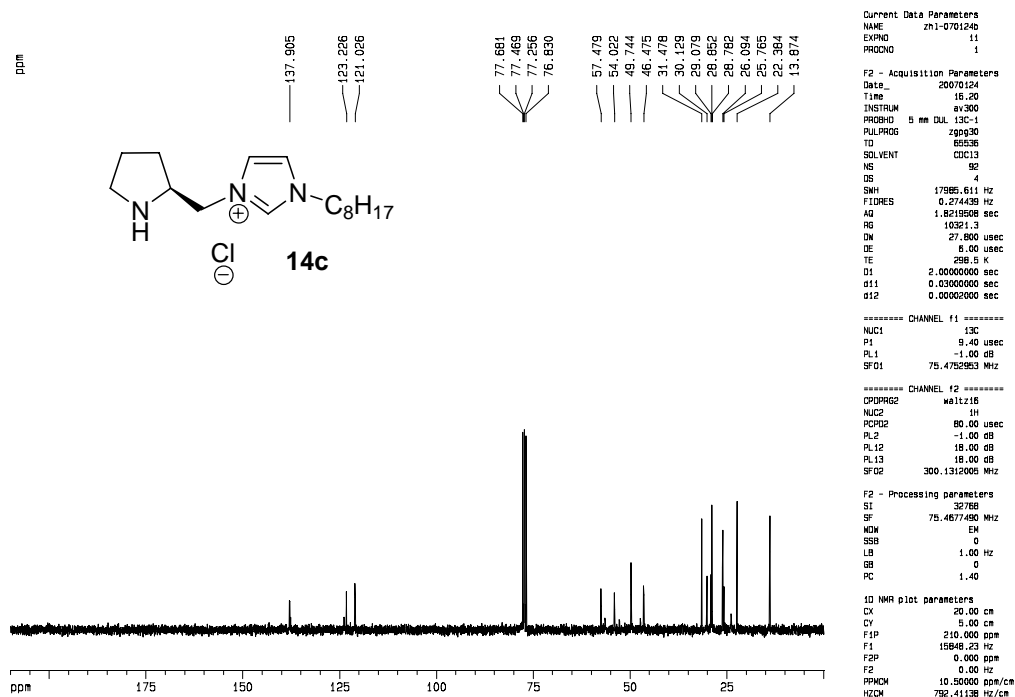

# Supplementary Material (ESI) for Organic and Biomolecular Chemistry  
 # This journal is © The Royal Society of Chemistry 2007

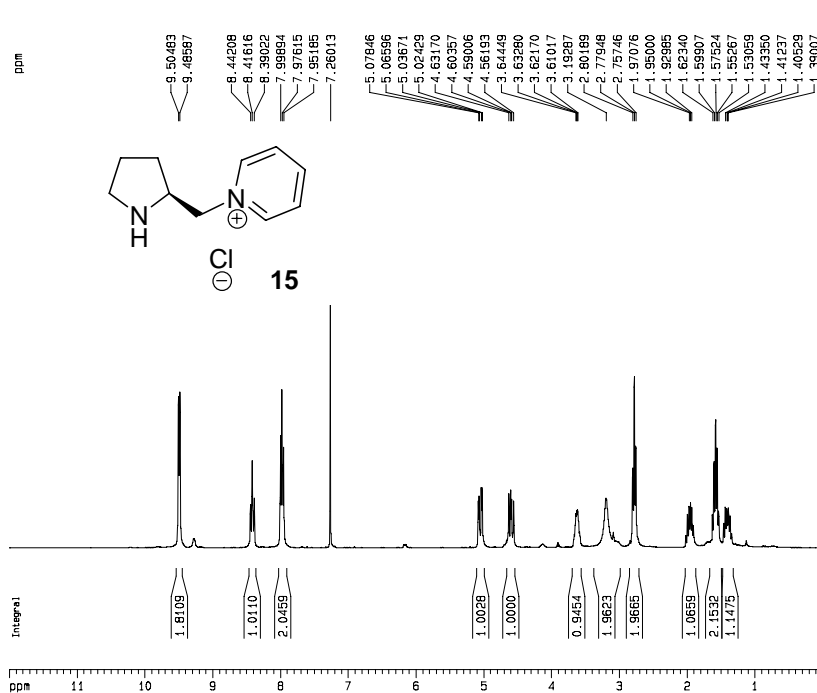

Current Data Parameters  
 NAME znl-06118e  
 EXPNO 11  
 PROCNO 1

F2 - Acquisition Parameters  
 Date\_ 20061118  
 Time 12.43  
 INSTRUM av300  
 PROBHD 5 mm DUL 13C-1  
 PULPROG zg30  
 TD 65536  
 SOLVENT CDCl3  
 NS 16  
 DS 2  
 SWH 6172.839 Hz  
 FIDRES 0.094190 Hz  
 AQ 5.3084660 sec  
 RG 128  
 DM 81.000 usec  
 DE 6.00 usec  
 TE 298.3 K  
 D1 2.0000000 sec

===== CHANNEL f1 =====  
 NUC1 1H  
 P1 9.30 usec  
 PL1 -1.00 dB  
 SFO1 300.1318534 Mhz

F2 - Processing parameters  
 S1 32768  
 SF 300.1300074 Mhz  
 MDW EM  
 SSB 0  
 LB 0.35 Hz  
 GB 0  
 PC 1.00

ID NMR plot parameters  
 CX 20.00 cm  
 CY 6.00 cm  
 F1P 12.000 ppm  
 F1 3601.56 Hz  
 F2P -0.000 ppm  
 F2 -0.00 Hz  
 FPCMC 0.60000 ppm/cm  
 HZCM 180.07600 Hz/cm

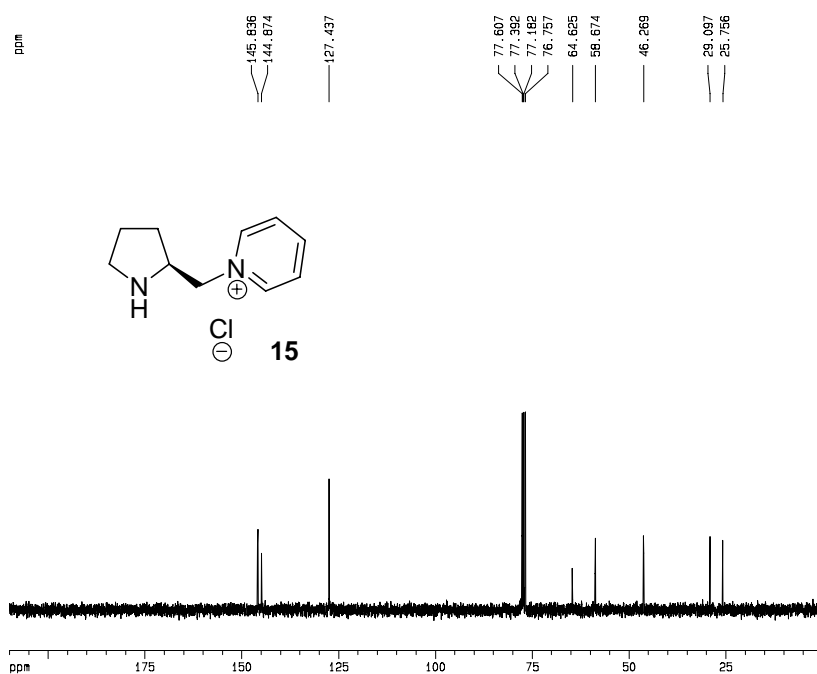

Current Data Parameters  
 NAME znl-06118e  
 EXPNO 12  
 PROCNO 1

F2 - Acquisition Parameters  
 Date\_ 20061118  
 Time 12.48  
 INSTRUM av300  
 PROBHD 5 mm DUL 13C-1  
 PULPROG zgpg30  
 TD 65536  
 SOLVENT CDCl3  
 NS 48  
 DS 4  
 SWH 17865.611 Hz  
 FIDRES 0.274459 Hz  
 AQ 1.8219508 sec  
 RG 16384  
 DM 27.800 usec  
 DE 8.00 usec  
 TE 299.0 K  
 D1 2.0000000 sec  
 d11 0.0300000 sec  
 d12 0.0002000 sec

===== CHANNEL f1 =====  
 NUC1 13C  
 P1 9.40 usec  
 PL1 -1.00 dB  
 SFO1 75.4782983 Mhz

===== CHANNEL f2 =====  
 CPDPRG2 waltz16  
 NUC2 1H  
 PCPD2 80.00 usec  
 PL2 -1.00 dB  
 PL12 18.00 dB  
 PL13 18.00 dB  
 SFO2 300.1312005 Mhz

F2 - Processing parameters  
 S1 32768  
 SF 75.4677490 Mhz  
 MDW EM  
 SSB 0  
 LB 1.00 Hz  
 GB 0  
 PC 1.40

ID NMR plot parameters  
 CX 20.00 cm  
 CY 6.00 cm  
 F1P 210.000 ppm  
 F1 15846.23 Hz  
 F2P 0.000 ppm  
 F2 0.00 Hz  
 FPCMC 10.50000 ppm/cm  
 HZCM 792.41138 Hz/cm

# Supplementary Material (ESI) for Organic and Biomolecular Chemistry  
 # This journal is © The Royal Society of Chemistry 2007

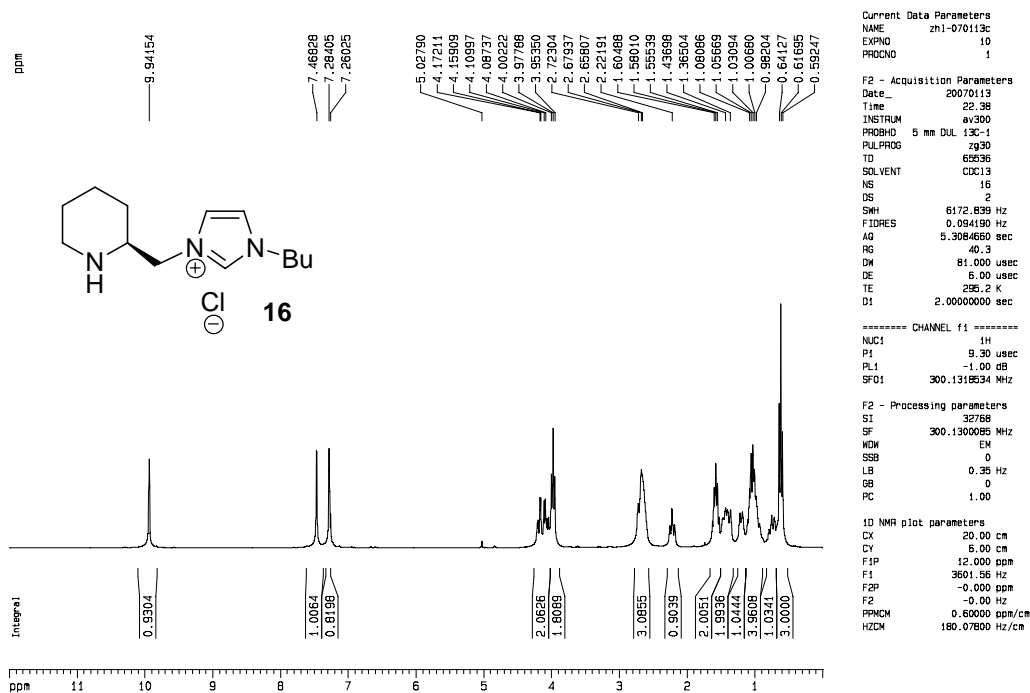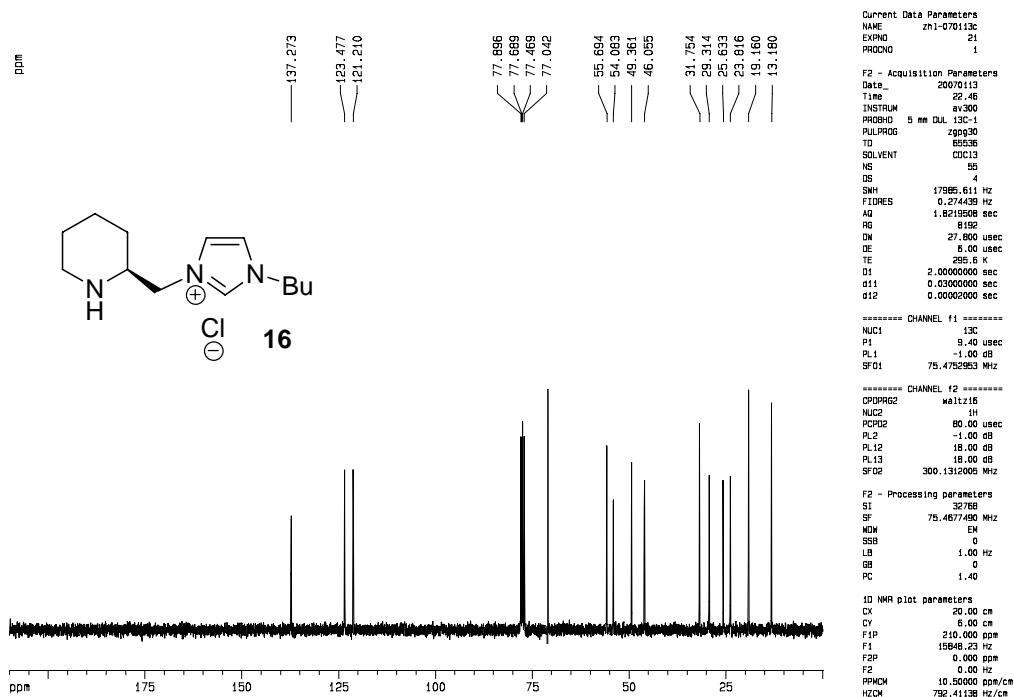

# Supplementary Material (ESI) for Organic and Biomolecular Chemistry  
 # This journal is © The Royal Society of Chemistry 2007

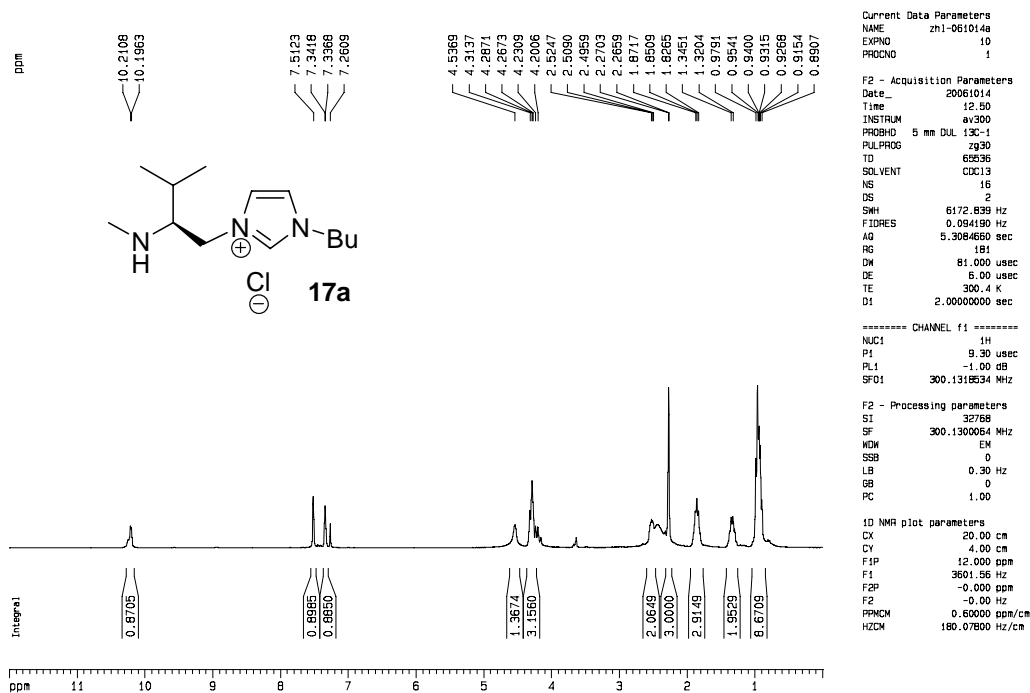

Current Data Parameters  
 NAME znl-061014a  
 EXPNO 10  
 PROCNO 1

F2 - Acquisition Parameters  
 Date\_ 20061014  
 Time 12:50  
 INSTRUM av300  
 PROBHD 5 mm DUL 13C-1  
 PULPROG zg30  
 TD 65536  
 SOLVENT CDCl3  
 NS 16  
 DS 2  
 SWH 6172.839 Hz  
 FIDRES 0.094190 Hz  
 AQ 5.3084660 sec  
 RG 181  
 DM 81.000 usec  
 DE 6.00 usec  
 TE 300.4 K  
 D1 2.0000000 sec

===== CHANNEL f1 =====  
 NUC1 1H  
 P1 9.30 usec  
 PL1 -1.00 dB  
 SFO1 300.1318534 MHz

F2 - Processing parameters  
 S1 32768  
 SF 300.1300064 MHz  
 MDW EM  
 SSB 0  
 LB 0.30 Hz  
 GB 0  
 PC 1.00

ID NMR plot parameters  
 CX 20.00 cm  
 CY 4.00 cm  
 F1P 12.000 ppm  
 F1 3601.56 Hz  
 F2P -0.000 ppm  
 F2 -0.00 Hz  
 FPCMC 0.60000 ppm/cm  
 HZCM 180.07800 Hz/cm

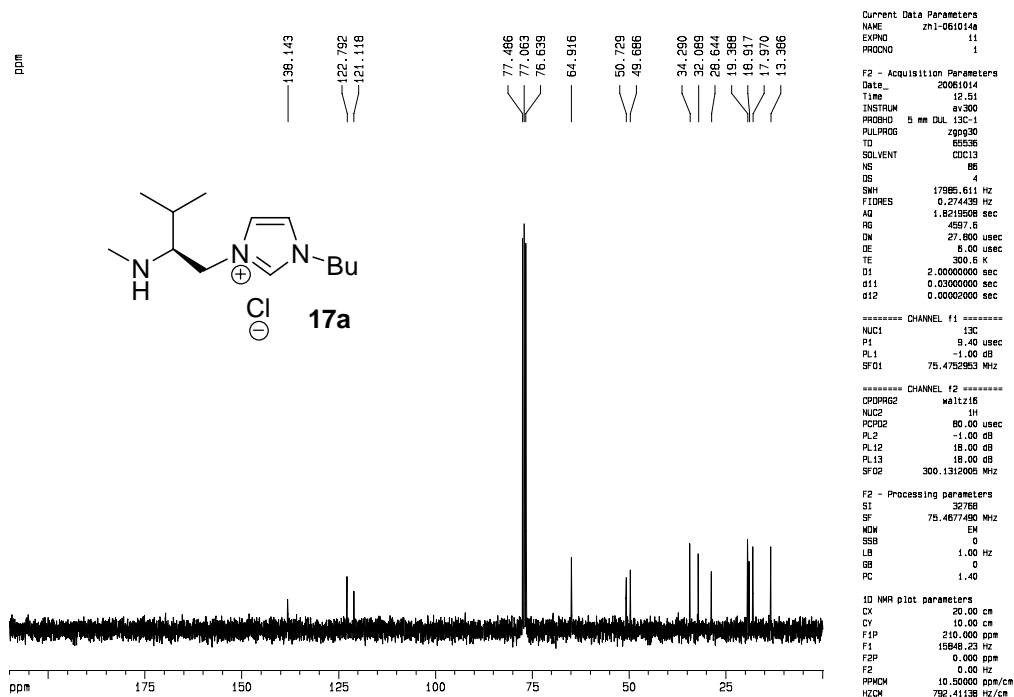

Current Data Parameters  
 NAME znl-061014a  
 EXPNO 11  
 PROCNO 1

F2 - Acquisition Parameters  
 Date\_ 20061014  
 Time 12:51  
 INSTRUM av300  
 PROBHD 5 mm DUL 13C-1  
 PULPROG zgpg30  
 TD 65536  
 SOLVENT CDCl3  
 NS 88  
 DS 4  
 SWH 17865.611 Hz  
 FIDRES 0.274459 Hz  
 AQ 1.8219508 sec  
 RG 4897.6  
 DM 27.800 usec  
 DE 8.00 usec  
 TE 300.6 K  
 D1 2.0000000 sec  
 d11 0.0300000 sec  
 d12 0.0002000 sec

===== CHANNEL f1 =====  
 NUC1 13C  
 P1 9.40 usec  
 PL1 -1.00 dB  
 SFO1 75.4782983 MHz

===== CHANNEL f2 =====  
 CPDPRG2 waltz16  
 NUC2 1H  
 PCPD2 80.00 usec  
 PL2 -1.00 dB  
 PL12 18.00 dB  
 PL13 18.00 dB  
 SFO2 300.1312005 MHz

F2 - Processing parameters  
 S1 32768  
 SF 75.4677490 MHz  
 MDW EM  
 SSB 0  
 LB 1.00 Hz  
 GB 0  
 PC 1.40

ID NMR plot parameters  
 CX 20.00 cm  
 CY 10.00 cm  
 F1P 210.000 ppm  
 F1 15846.23 Hz  
 F2P 0.000 ppm  
 F2 0.00 Hz  
 FPCMC 10.50000 ppm/cm  
 HZCM 792.41138 Hz/cm

# Supplementary Material (ESI) for Organic and Biomolecular Chemistry  
 # This journal is © The Royal Society of Chemistry 2007

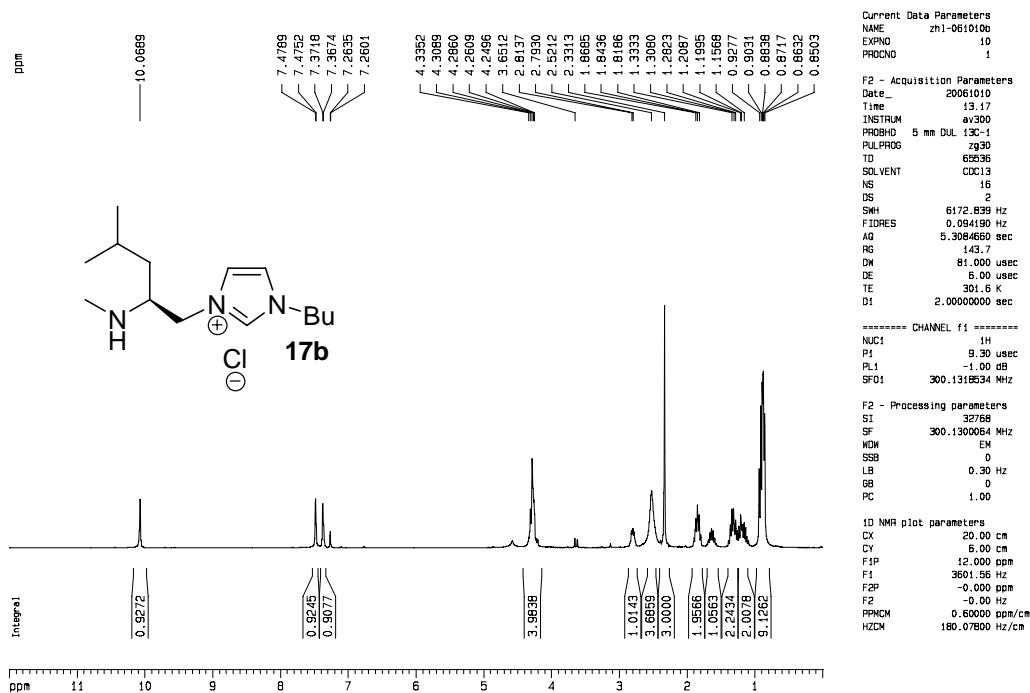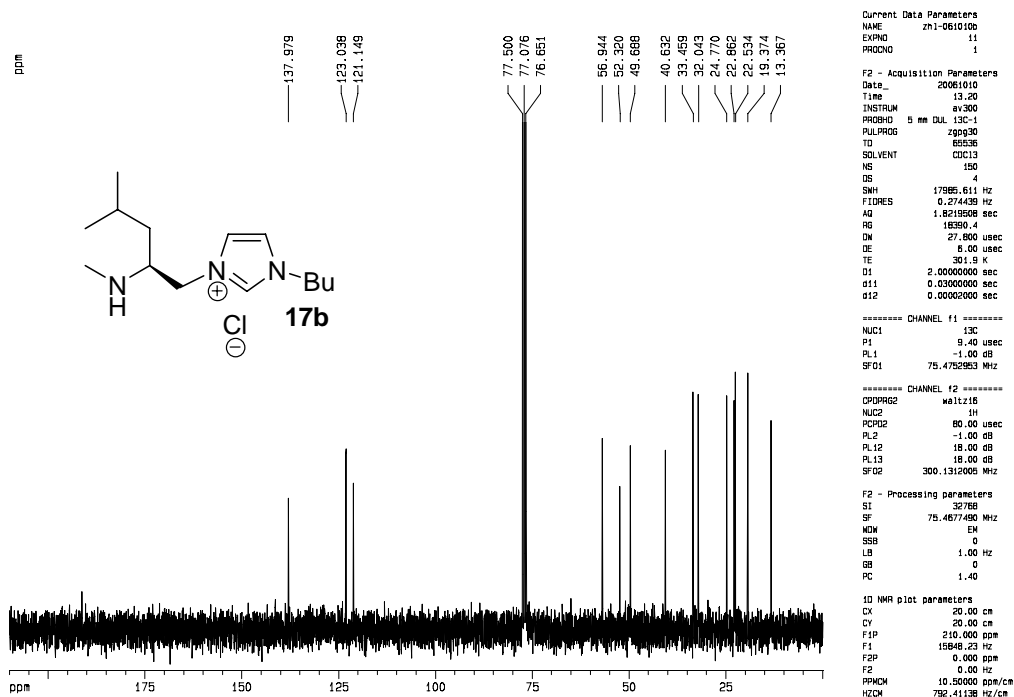



# Supplementary Material (ESI) for Organic and Biomolecular Chemistry  
 # This journal is © The Royal Society of Chemistry 2007

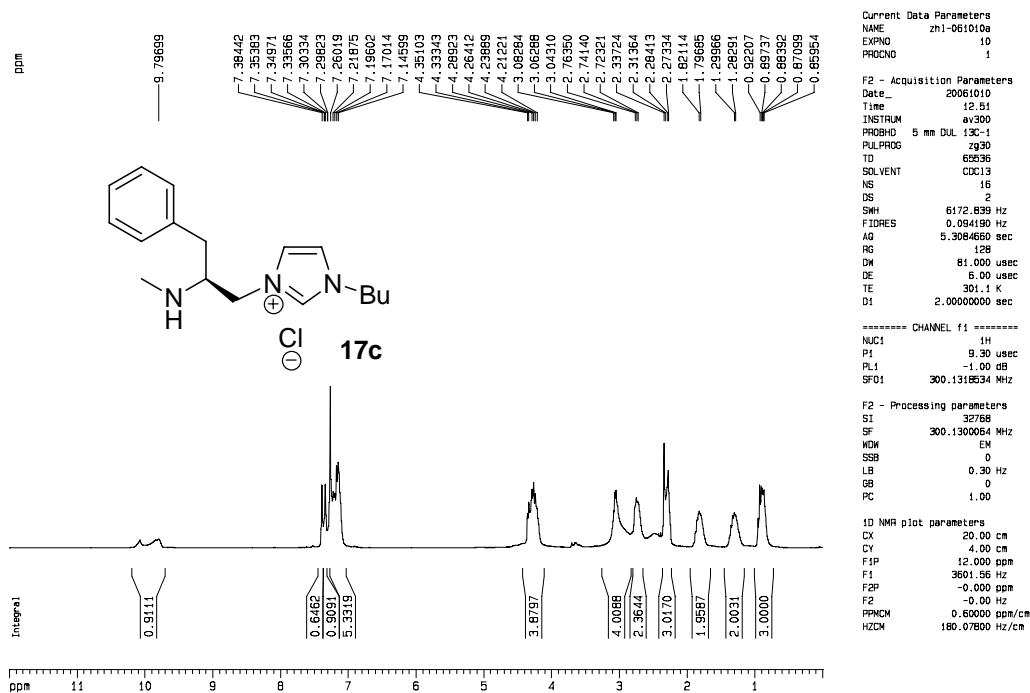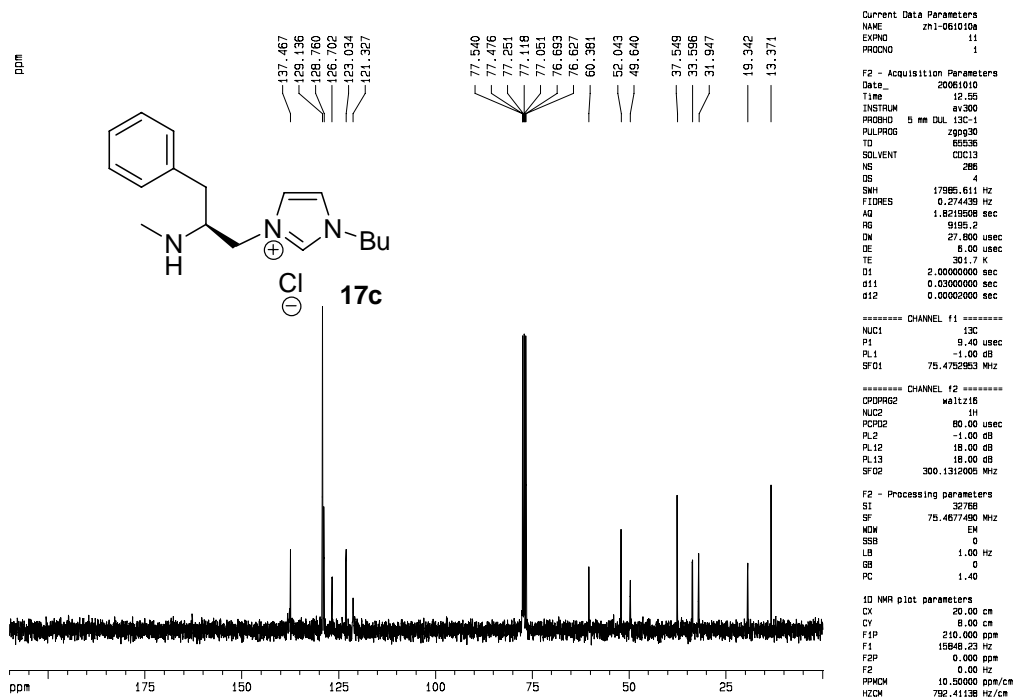

# Supplementary Material (ESI) for Organic and Biomolecular Chemistry  
 # This journal is © The Royal Society of Chemistry 2007

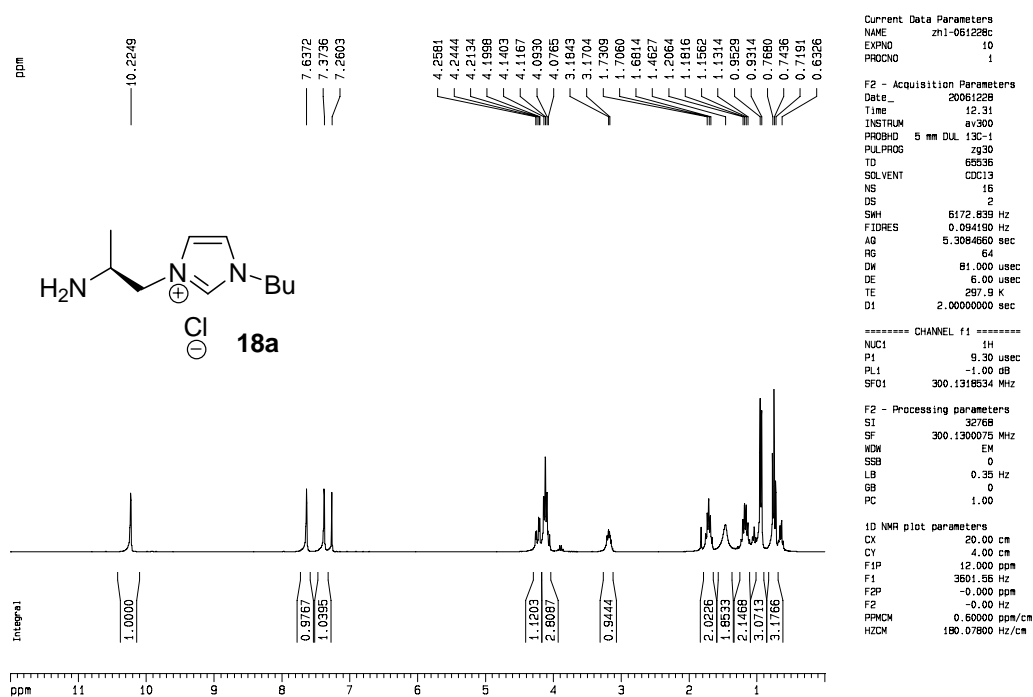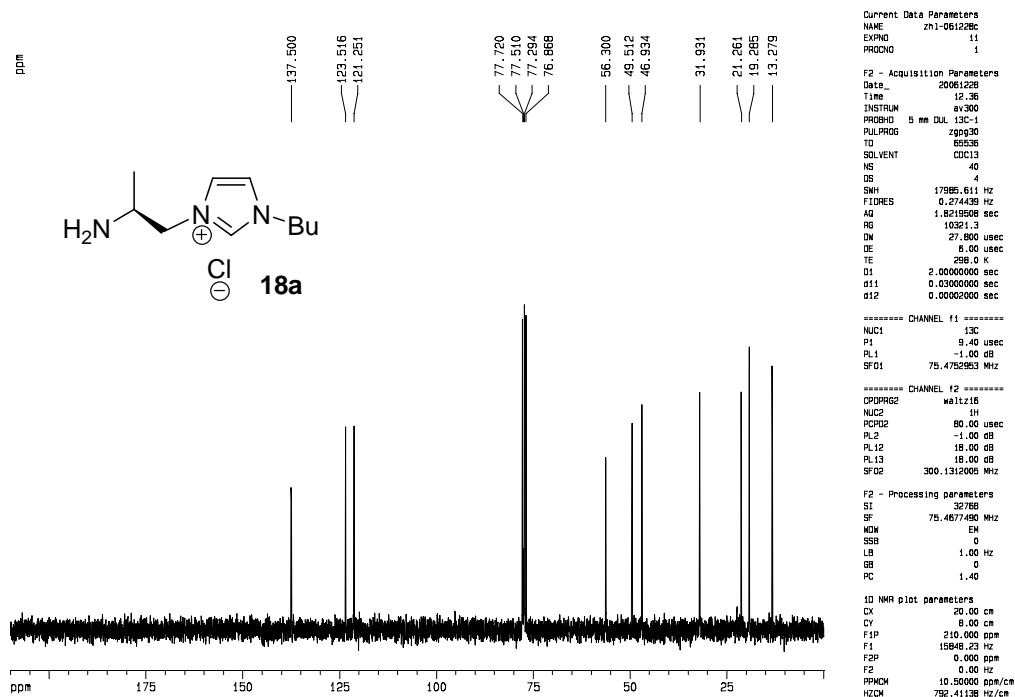

# Supplementary Material (ESI) for Organic and Biomolecular Chemistry  
 # This journal is © The Royal Society of Chemistry 2007

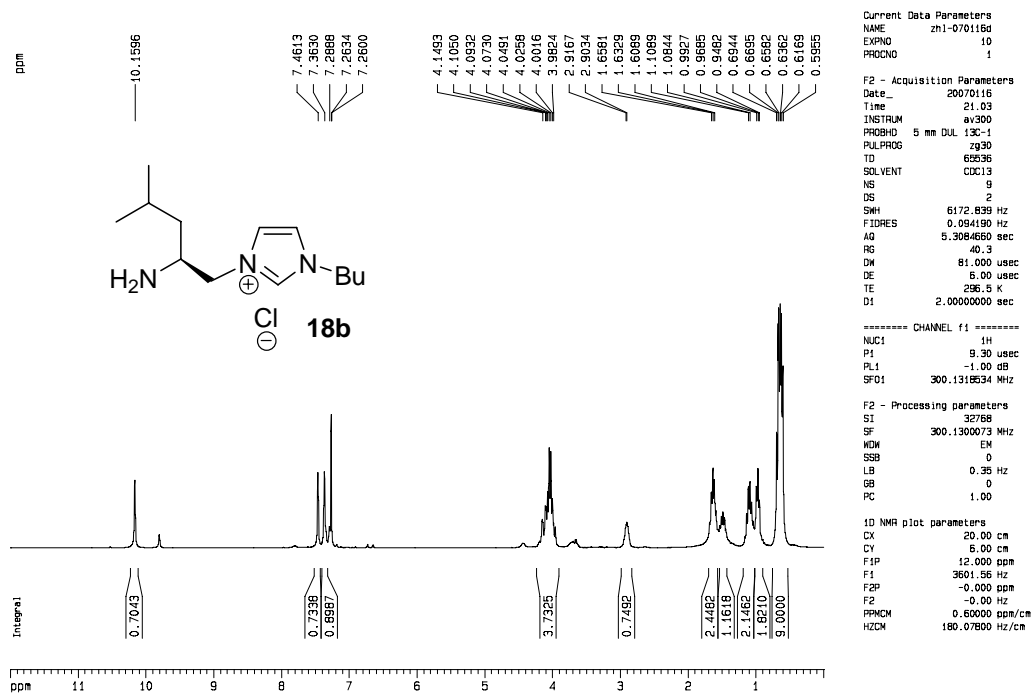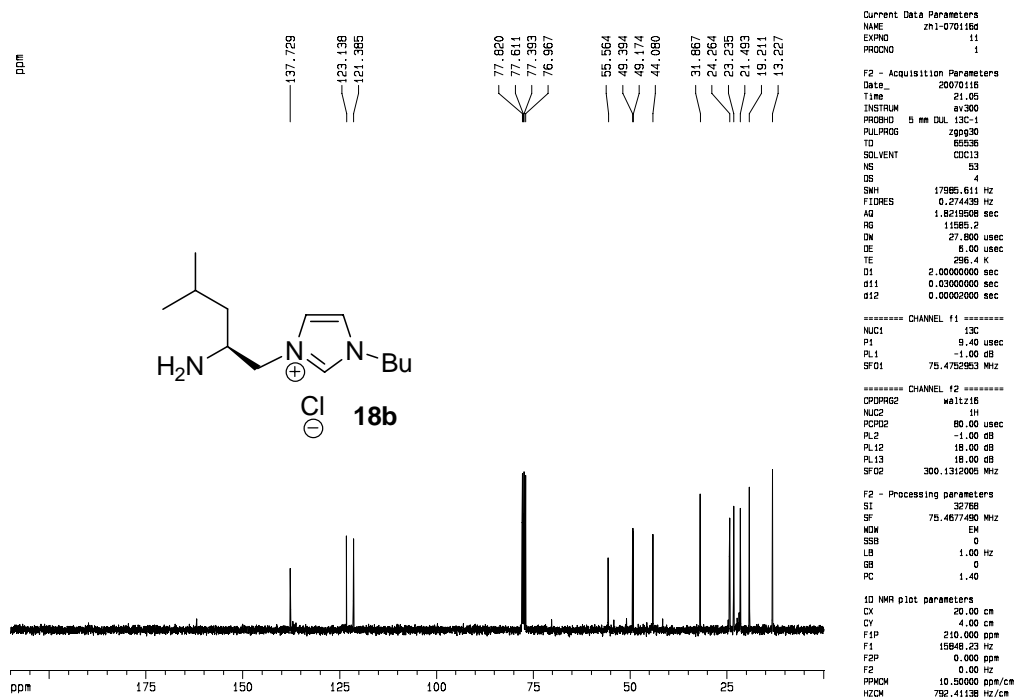

# Supplementary Material (ESI) for Organic and Biomolecular Chemistry  
 # This journal is © The Royal Society of Chemistry 2007

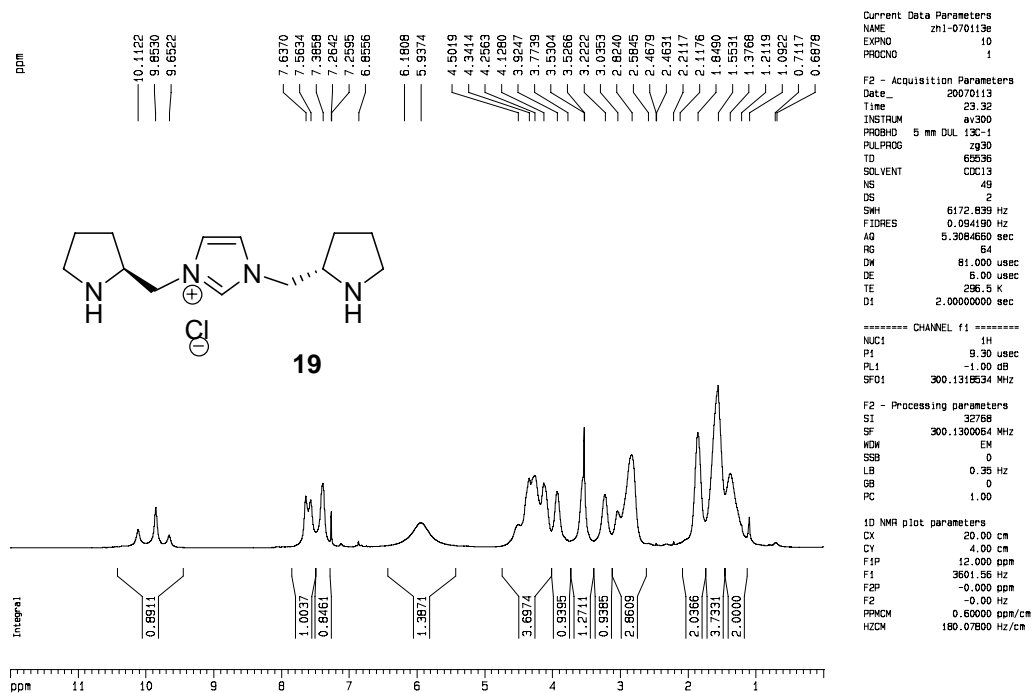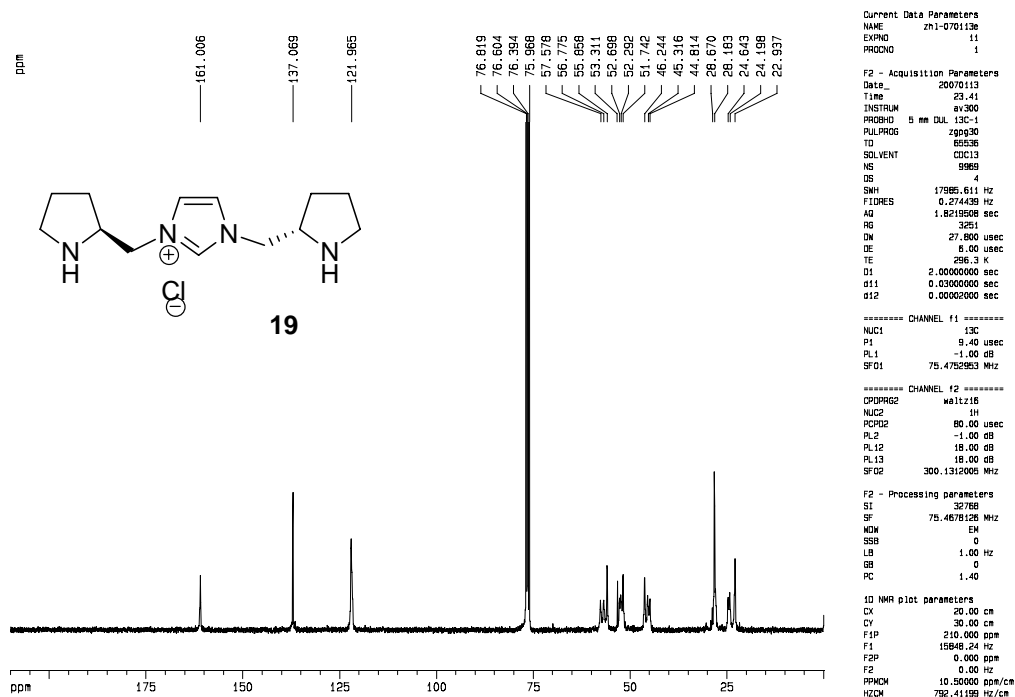

# Supplementary Material (ESI) for Organic and Biomolecular Chemistry  
 # This journal is © The Royal Society of Chemistry 2007

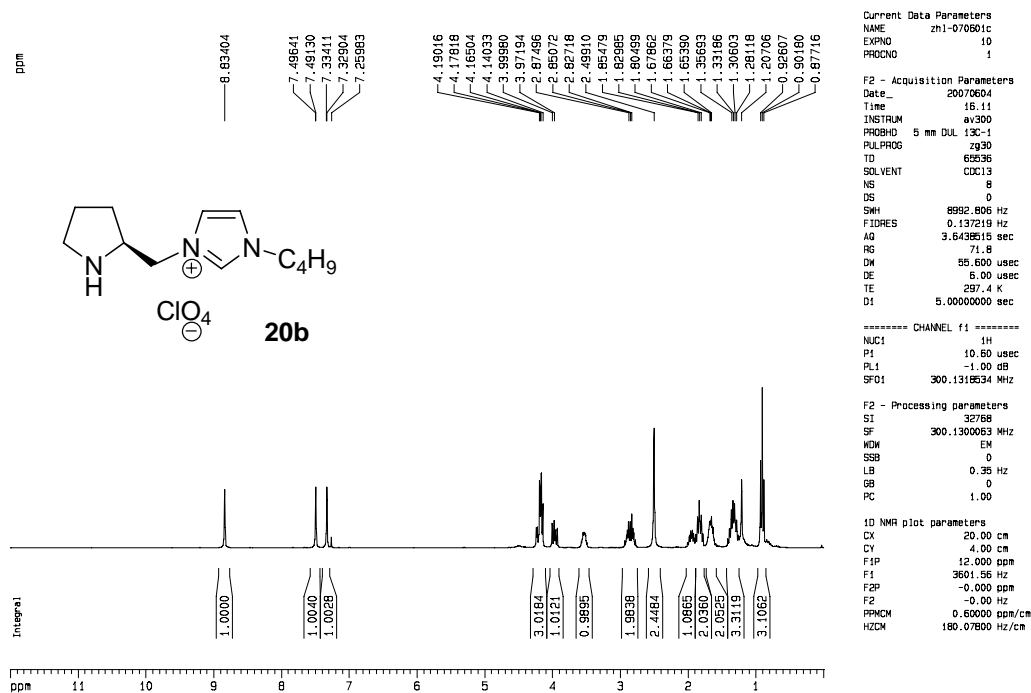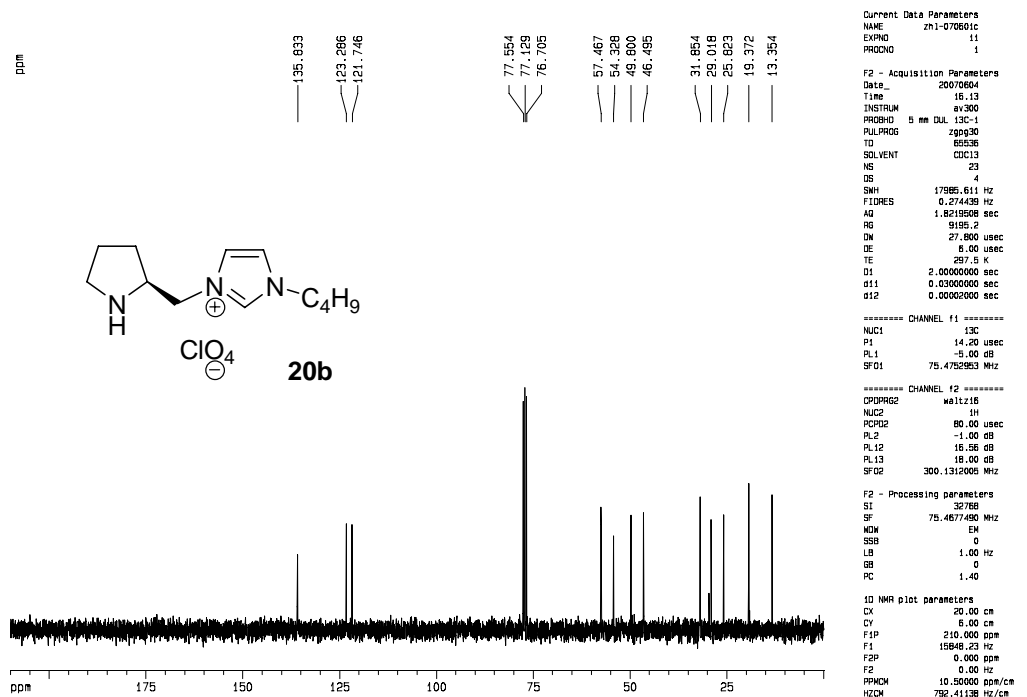

# Supplementary Material (ESI) for Organic and Biomolecular Chemistry  
 # This journal is © The Royal Society of Chemistry 2007

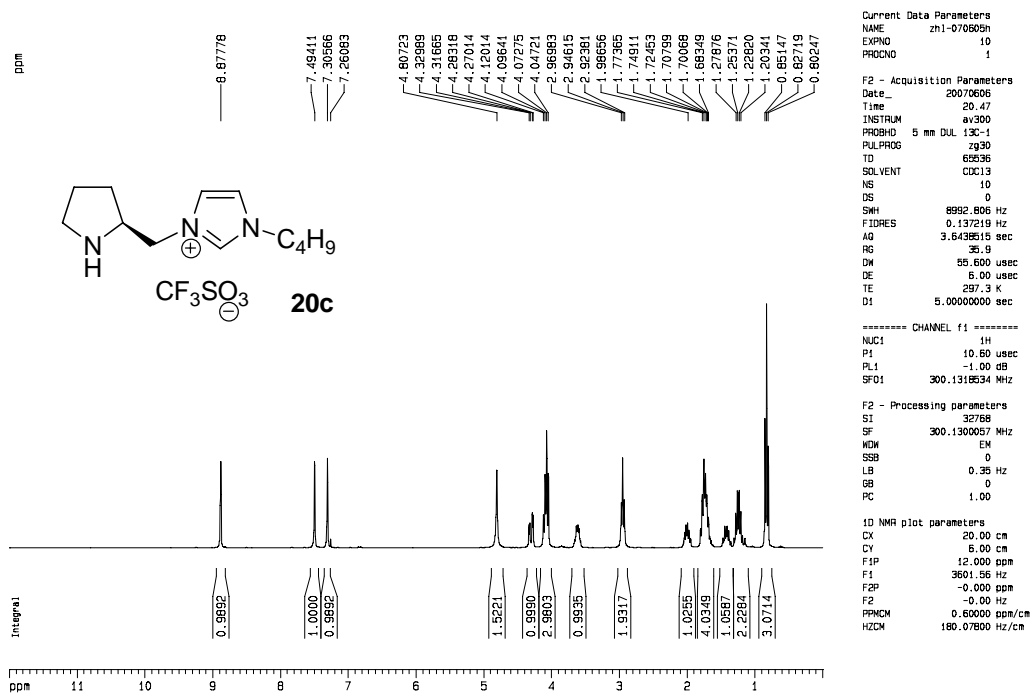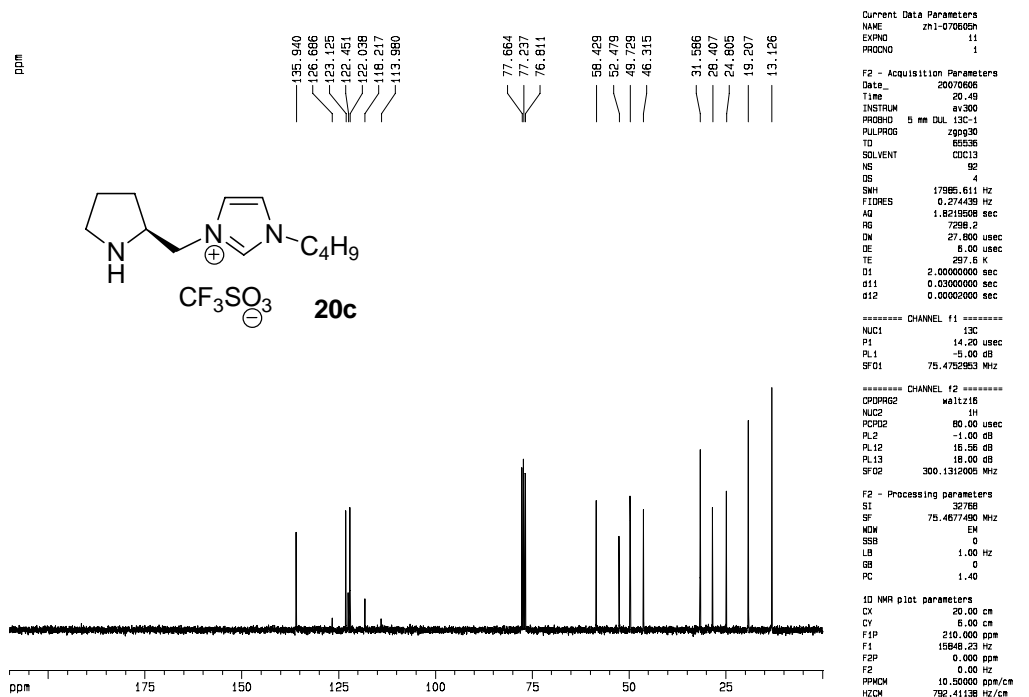

# Supplementary Material (ESI) for Organic and Biomolecular Chemistry  
 # This journal is © The Royal Society of Chemistry 2007

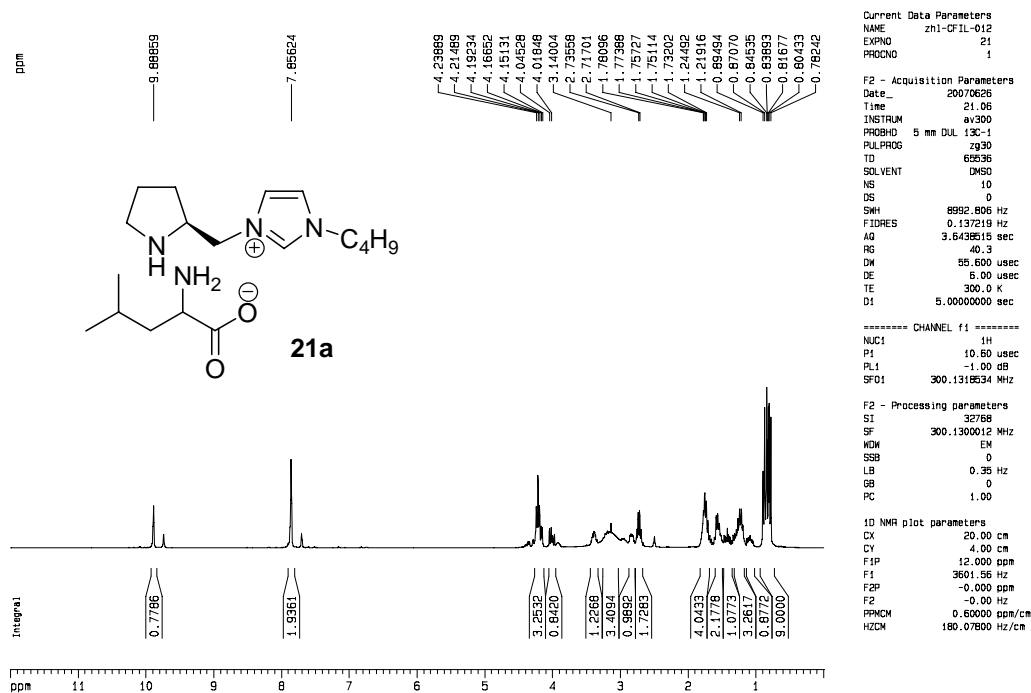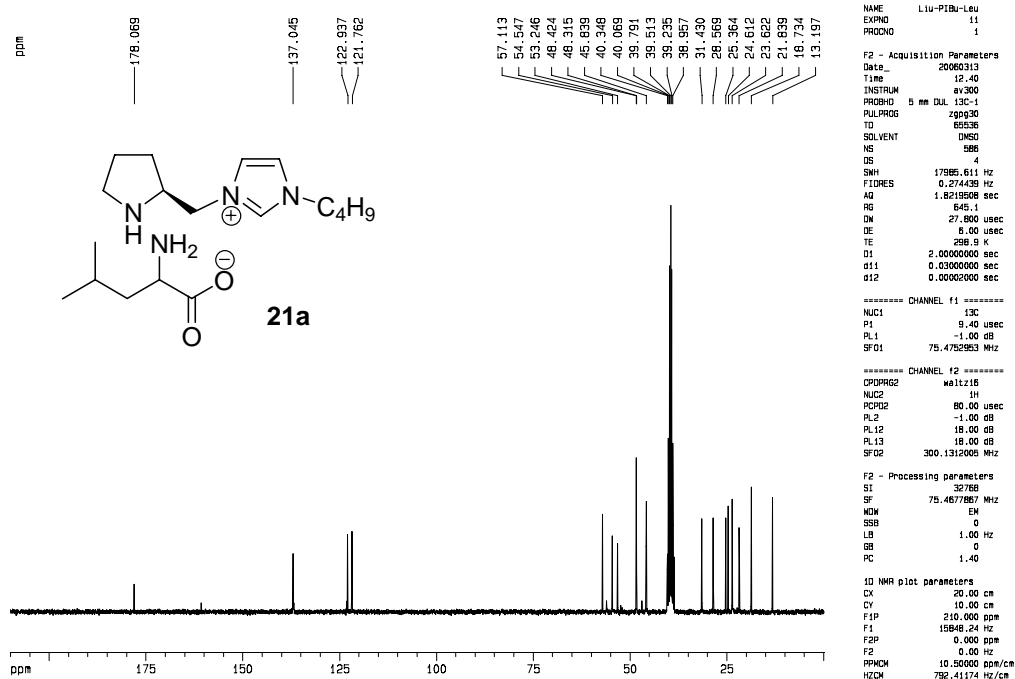

# Supplementary Material (ESI) for Organic and Biomolecular Chemistry  
 # This journal is © The Royal Society of Chemistry 2007

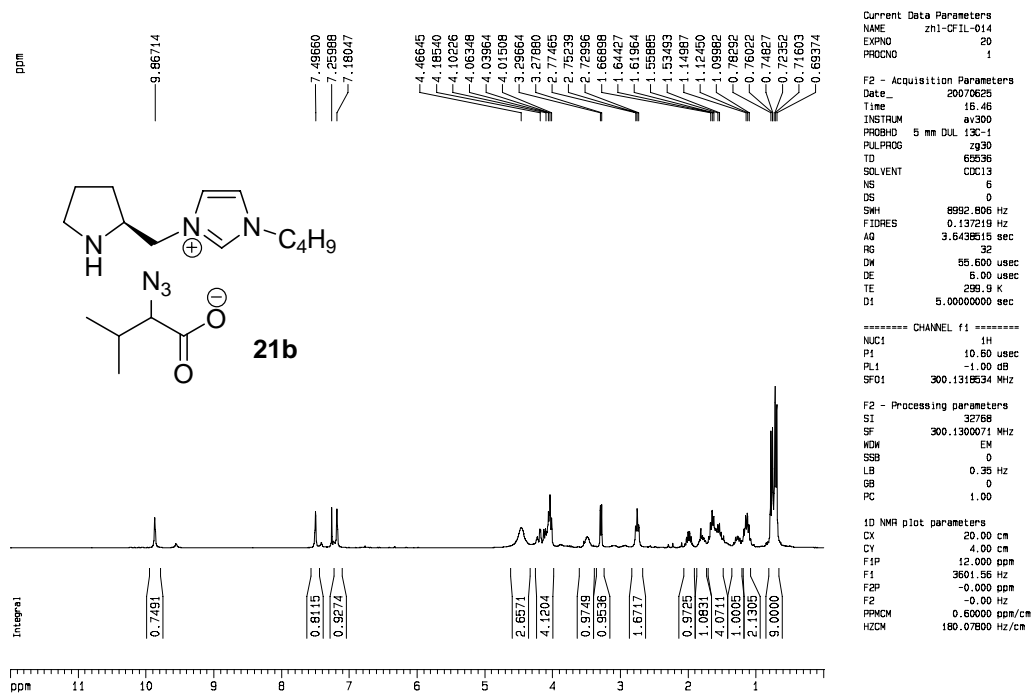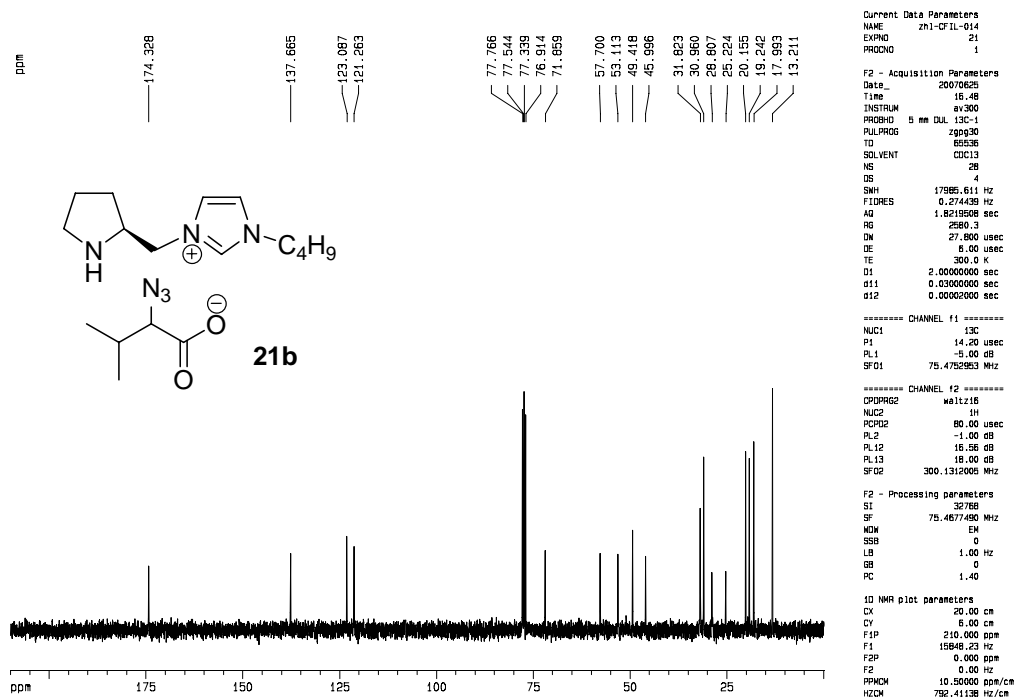



# Supplementary Material (ESI) for Organic and Biomolecular Chemistry  
 # This journal is © The Royal Society of Chemistry 2007

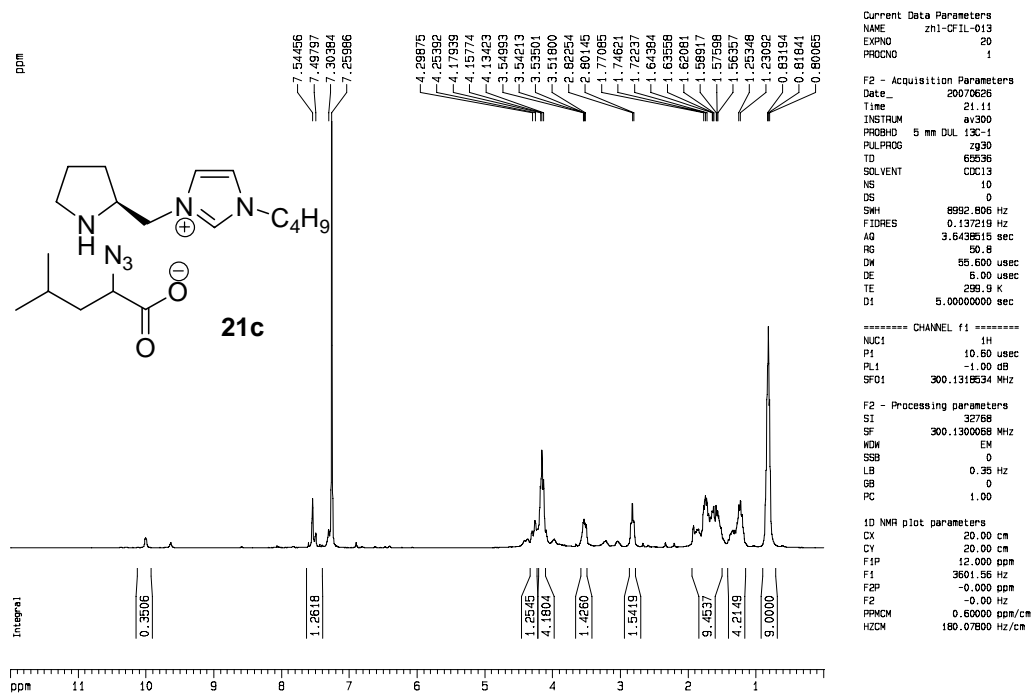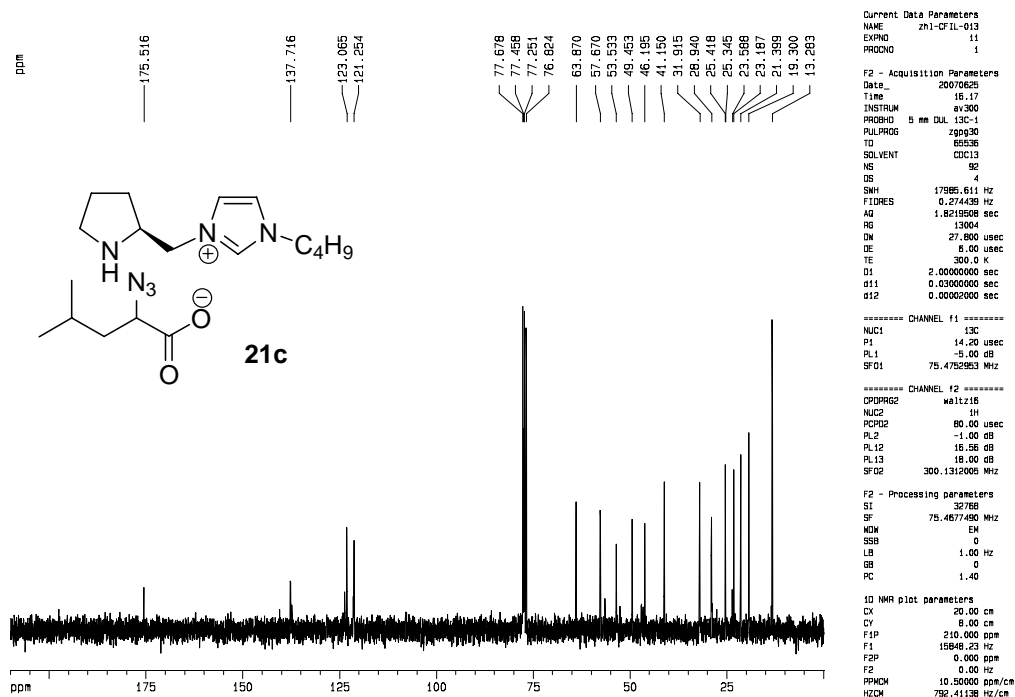

# Supplementary Material (ESI) for Organic and Biomolecular Chemistry  
 # This journal is © The Royal Society of Chemistry 2007

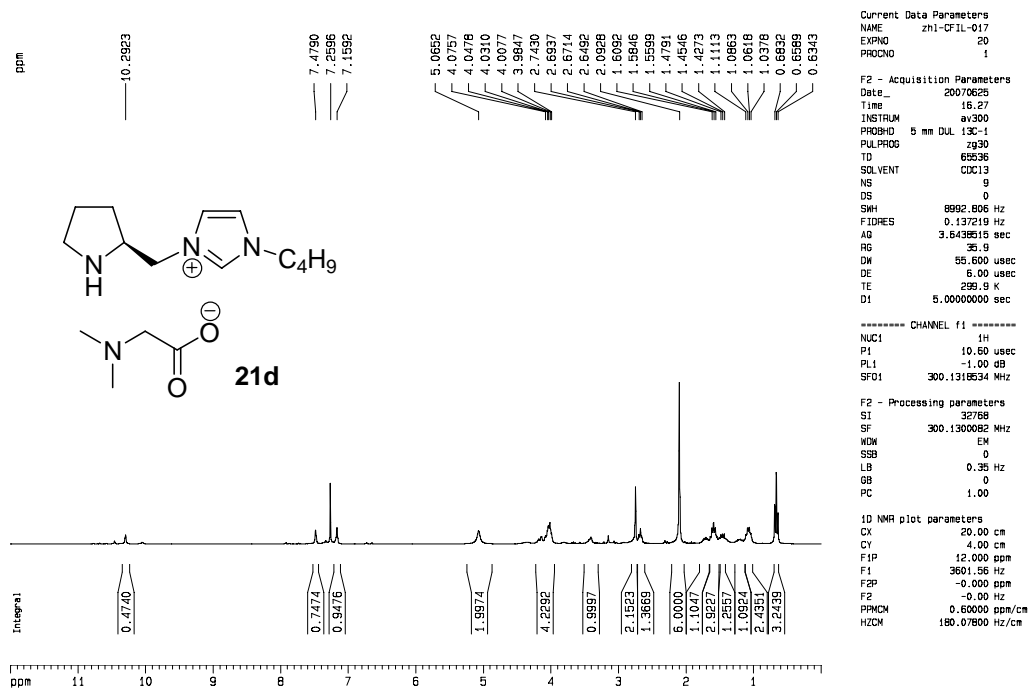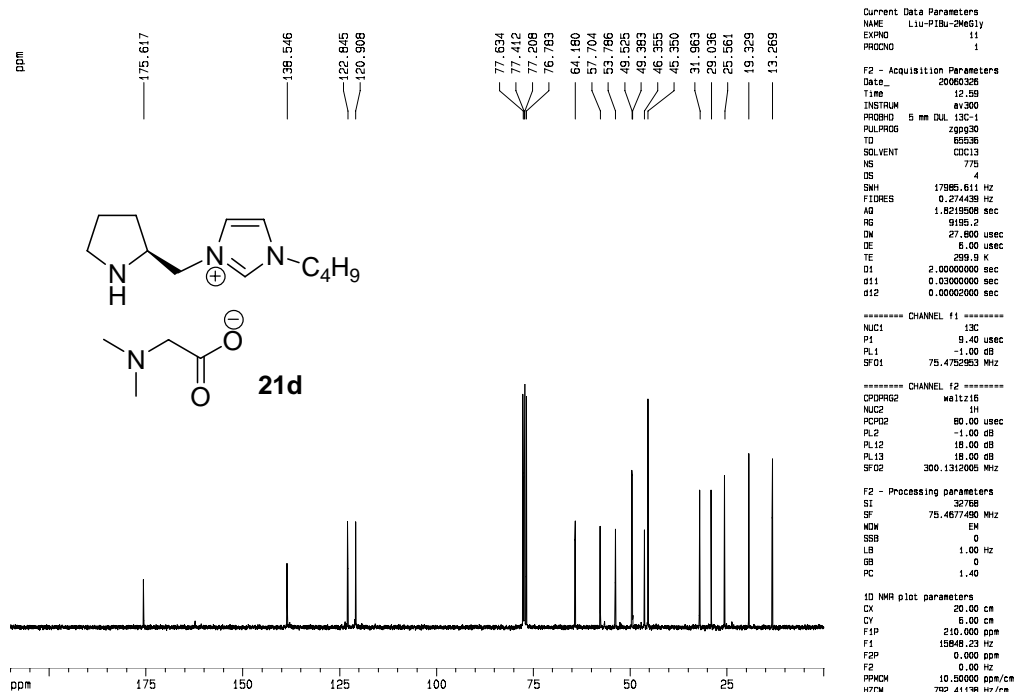

# Supplementary Material (ESI) for Organic and Biomolecular Chemistry  
 # This journal is © The Royal Society of Chemistry 2007

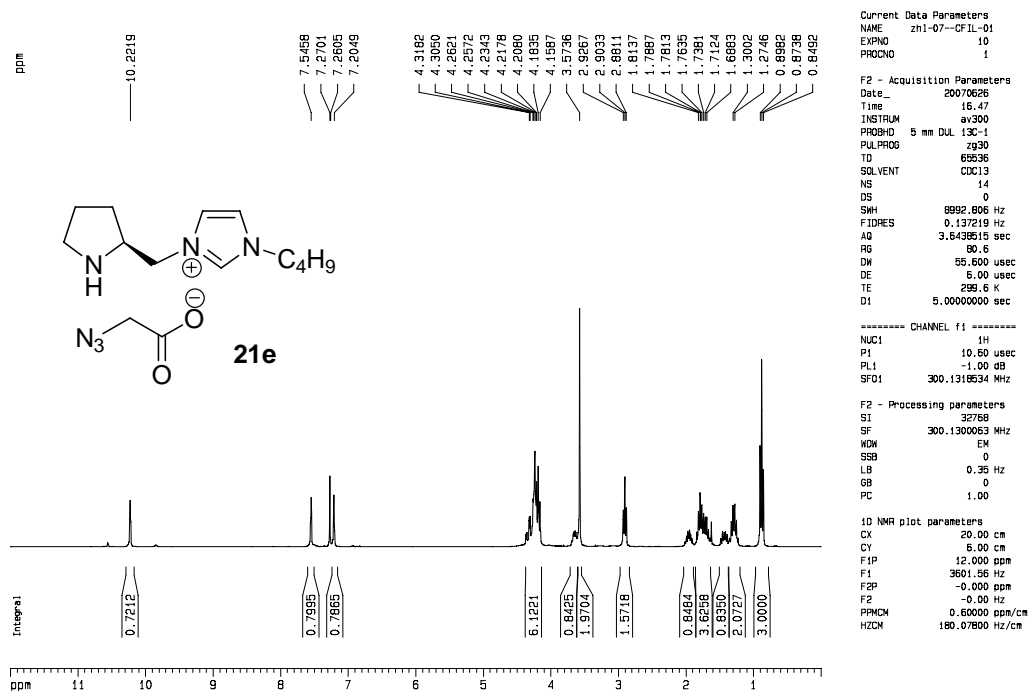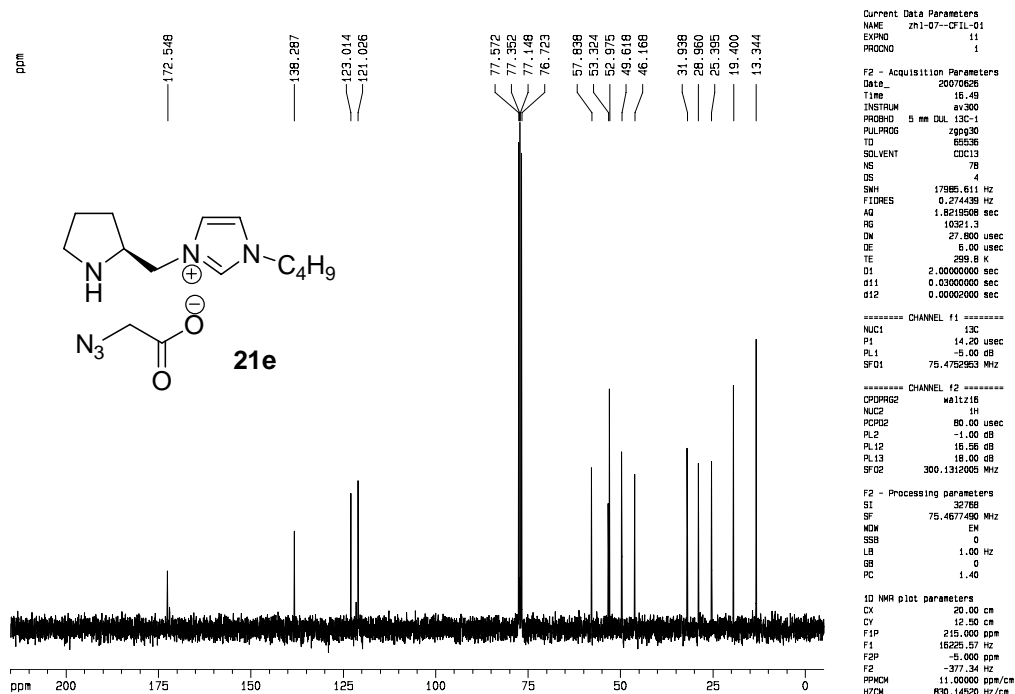

# Supplementary Material (ESI) for Organic and Biomolecular Chemistry  
 # This journal is © The Royal Society of Chemistry 2007

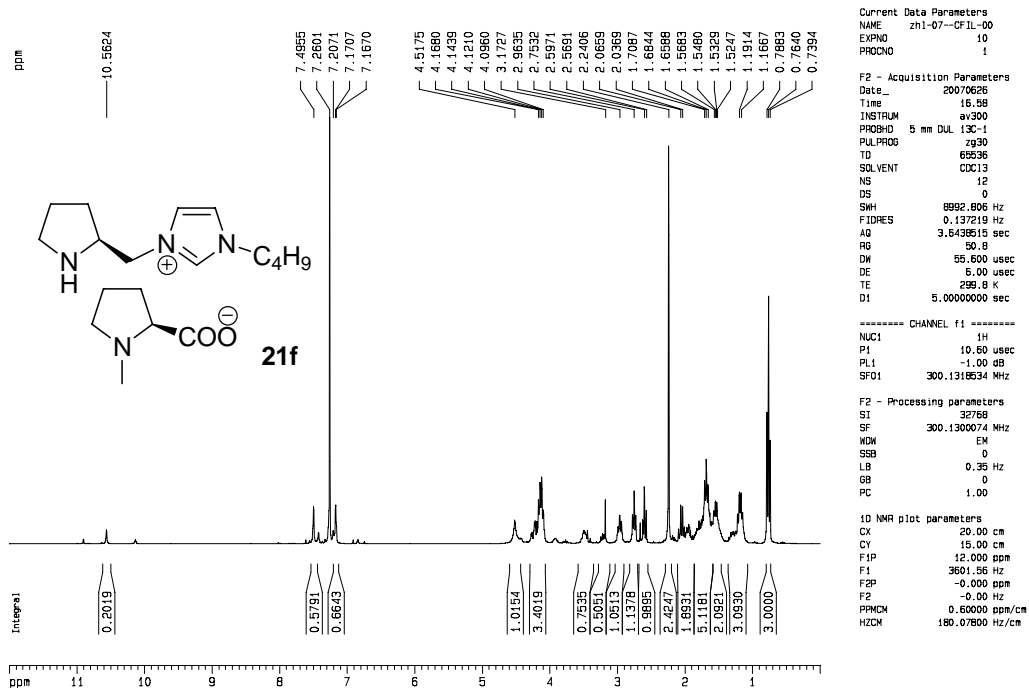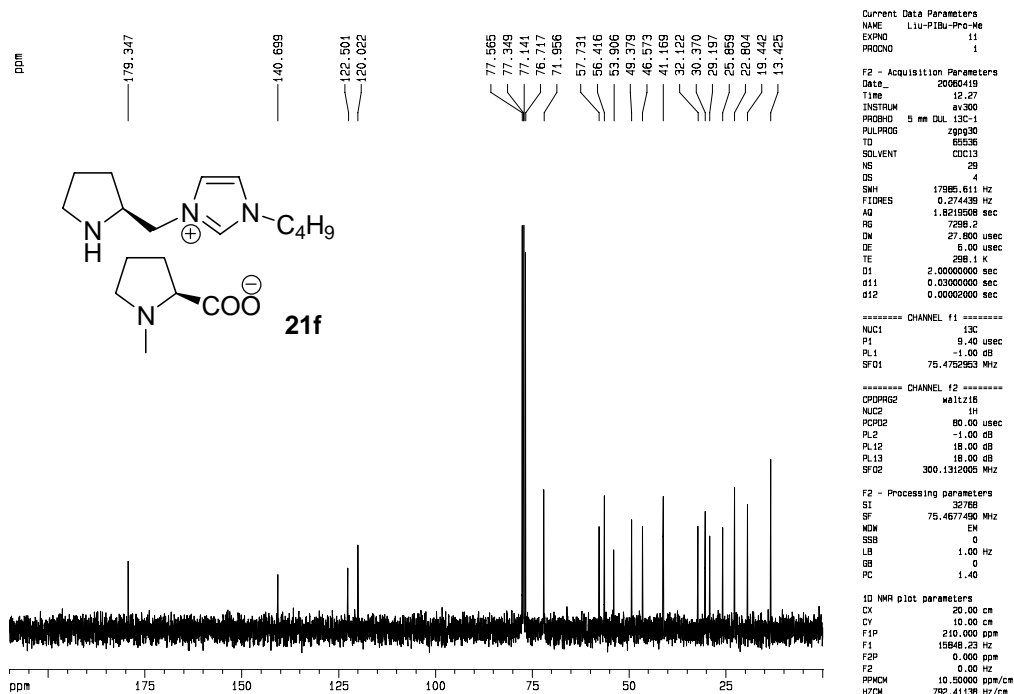

# Supplementary Material (ESI) for Organic and Biomolecular Chemistry  
 # This journal is © The Royal Society of Chemistry 2007

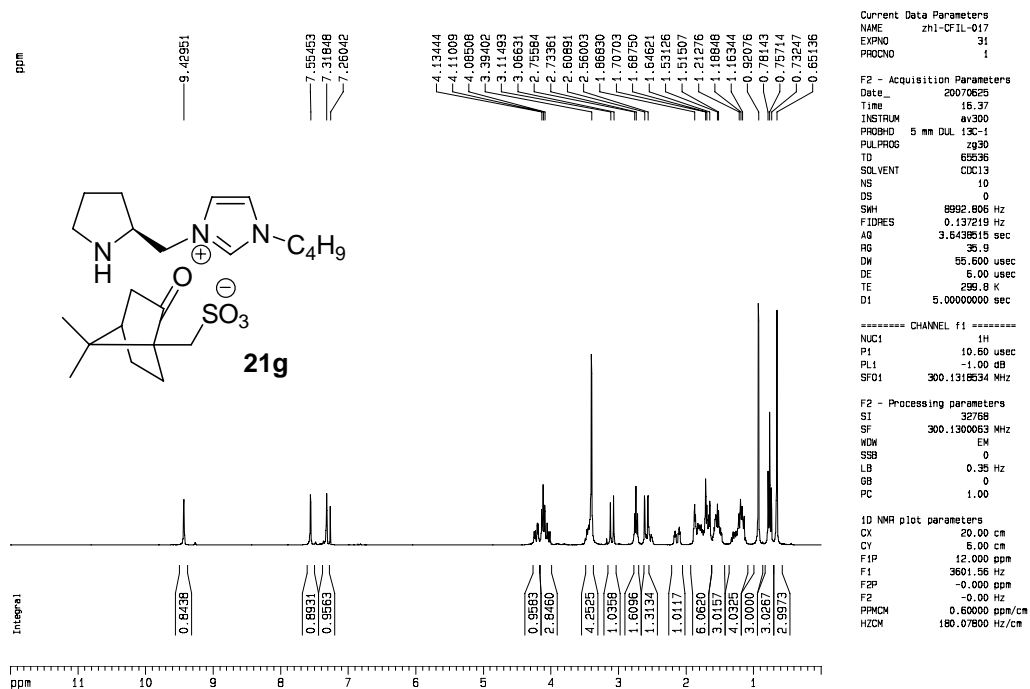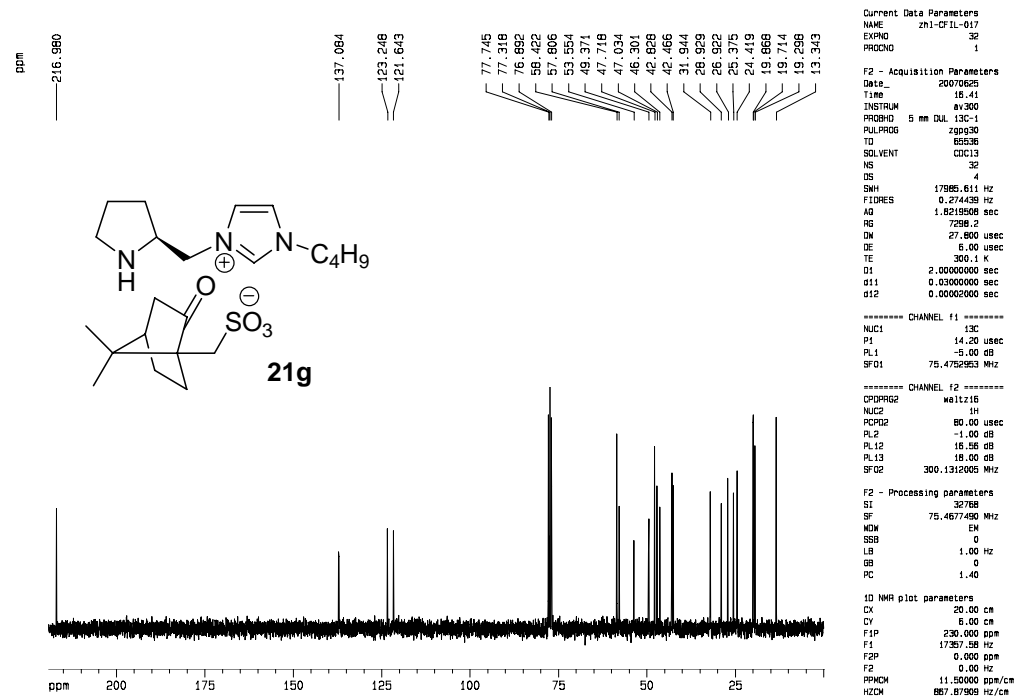

Supplement: b713843a.pdf [file b713843a.pdf]
